# Supplementary material for: A COVID-19 Drug Repurposing Strategy through Quantitative Homological Similarities Using a Topological Data Analysis-Based Framework
Source: MDPI journal article supplement (doi:10.3390/pharmaceutics13040488), 2021-04-02

## **SUPPLEMENTARY FILE 4**

Interacting residues between the 3 viral proteins  
and the 16 drugs identified as potential  
repurposing candidates.

**6m2q: 3CL pro**

**DB00263: Sulfoxazole**

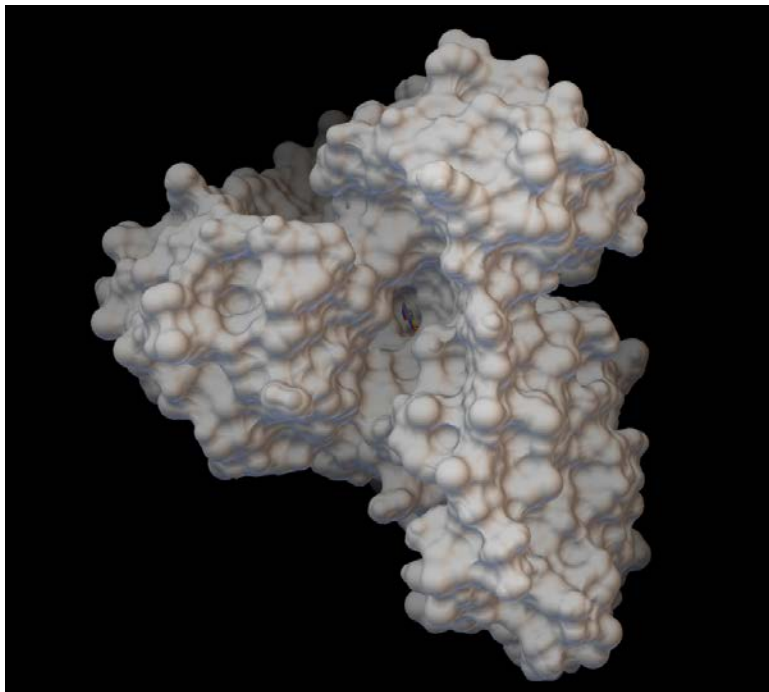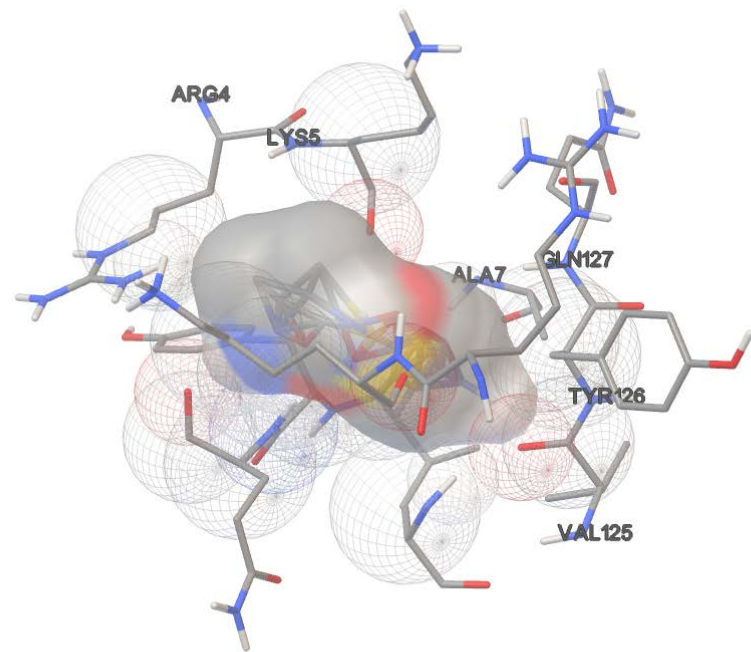

6m2q: 3CL pro

DB00328: Indomethacin

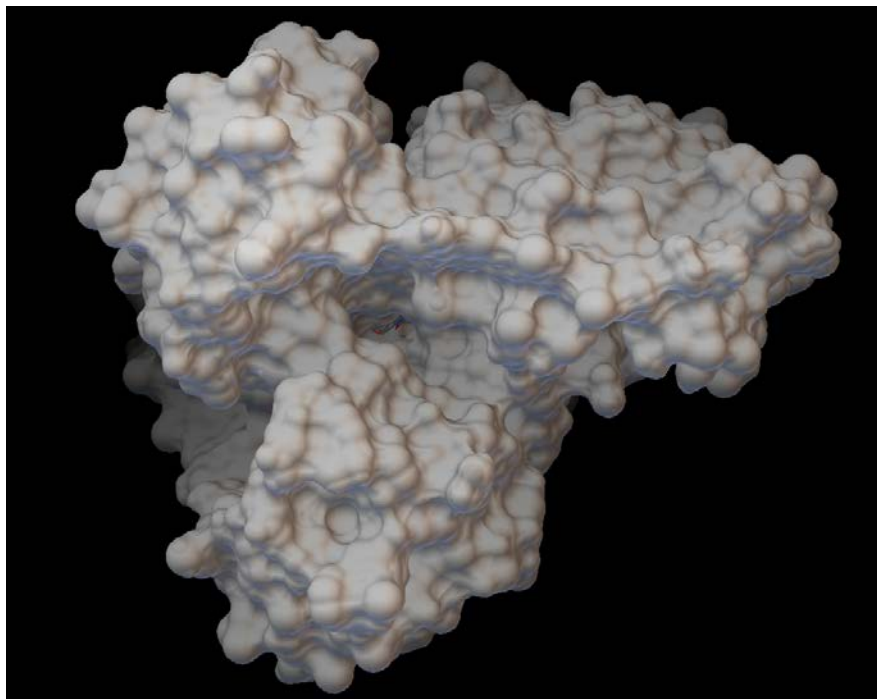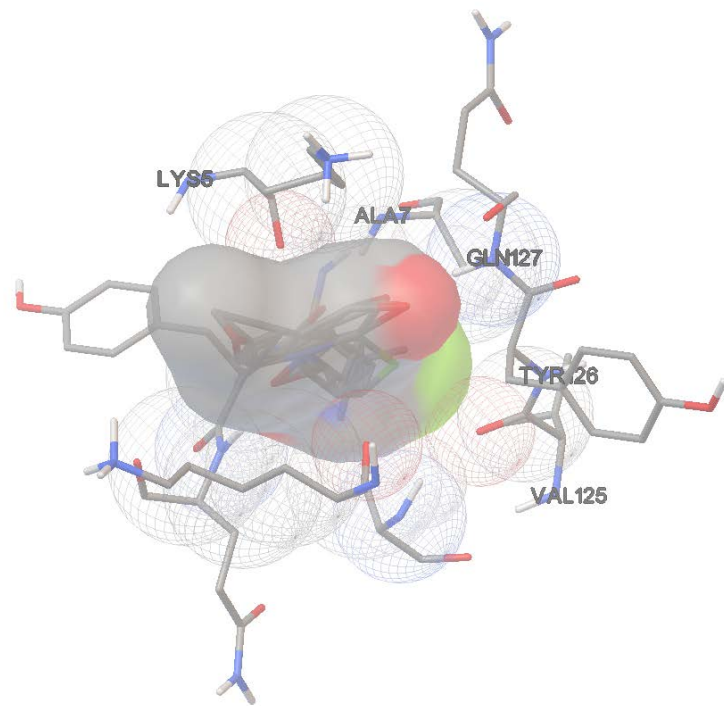

6m2q: 3CL pro  
DB00605: Sulindac

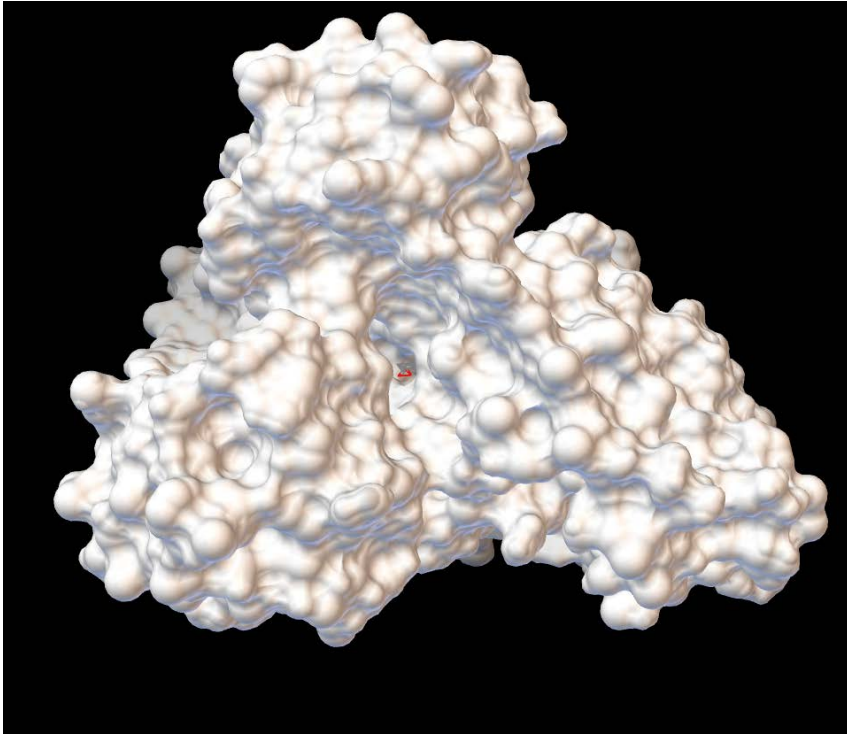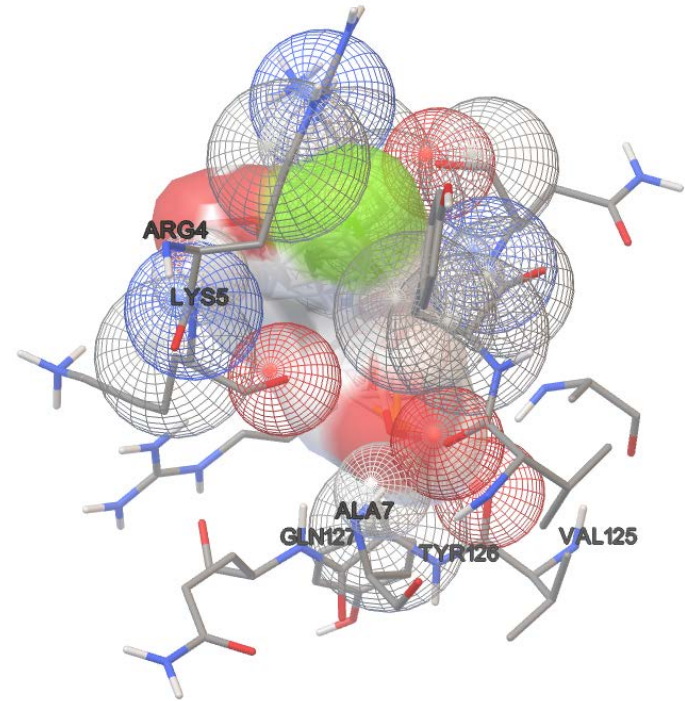

**6m2q: 3CL pro**  
**DB01254: Dasatinib**

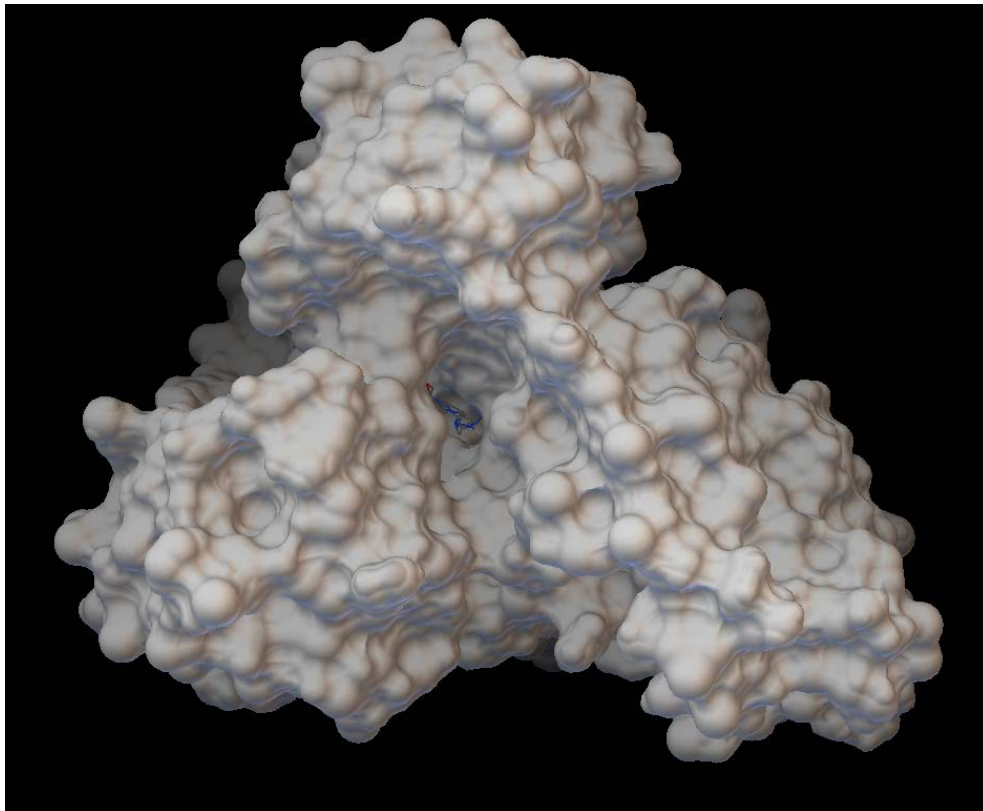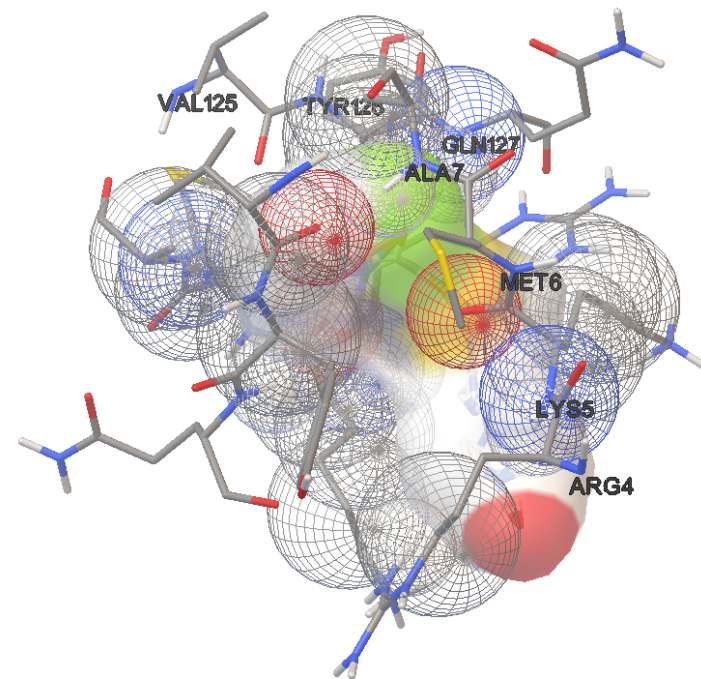



6m2q: 3CL pro  
DB01698: Rutin

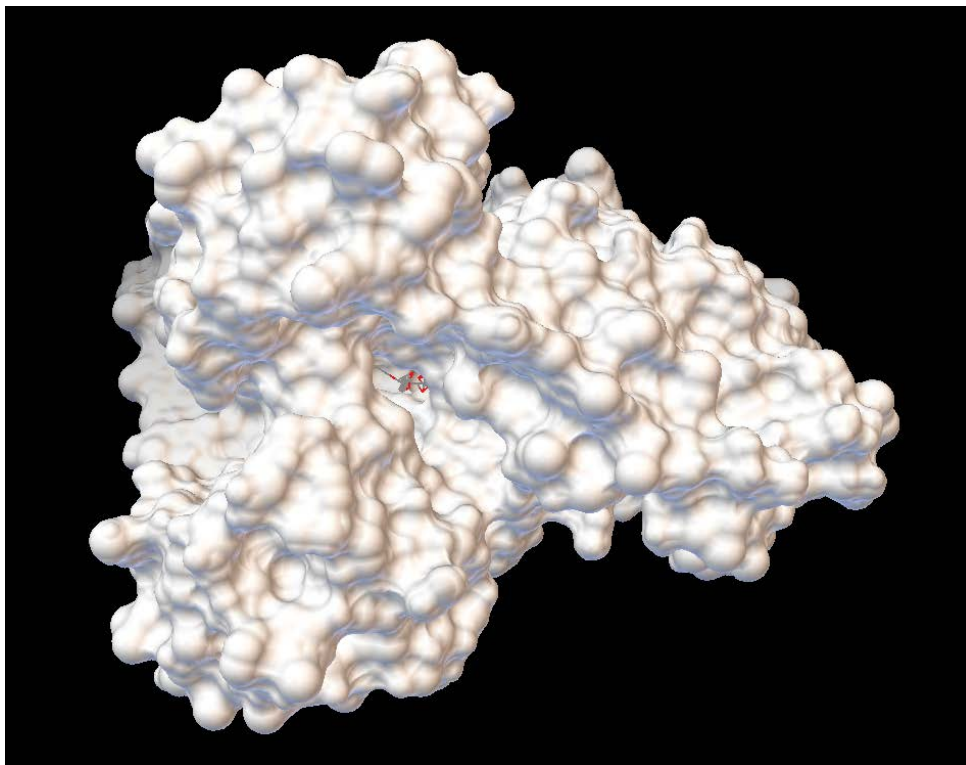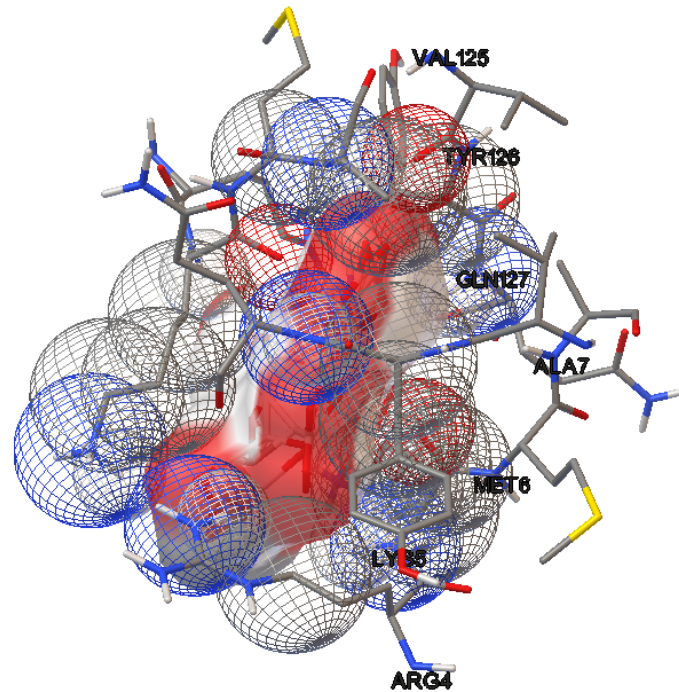

**6m2q: 3CL pro**  
**DB02659: Cholic Acid**

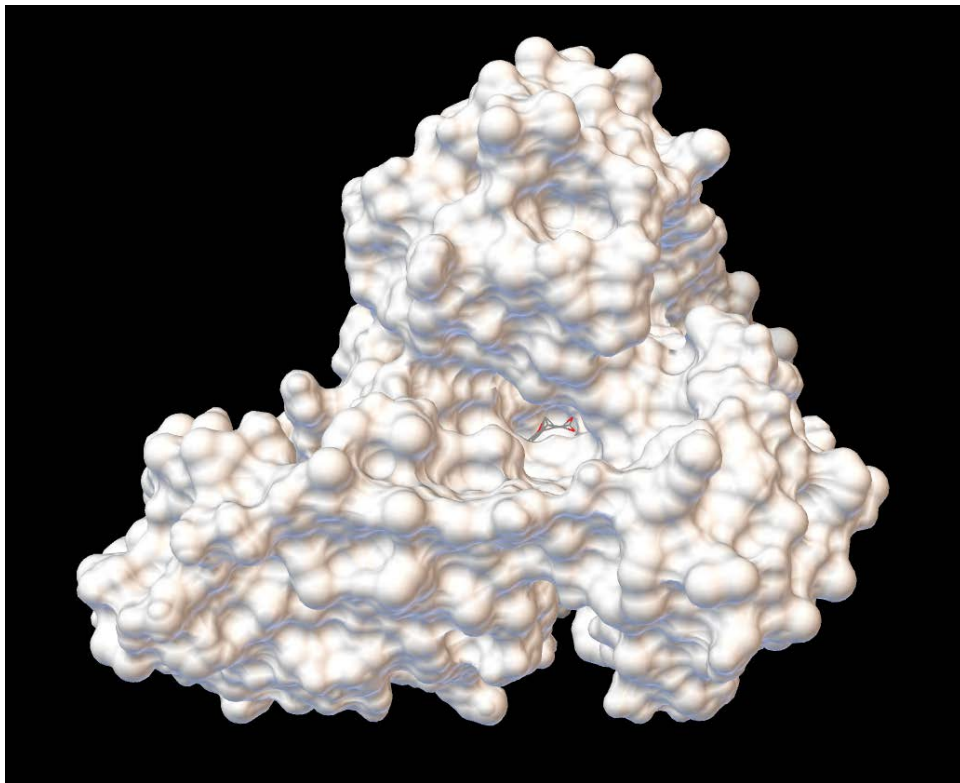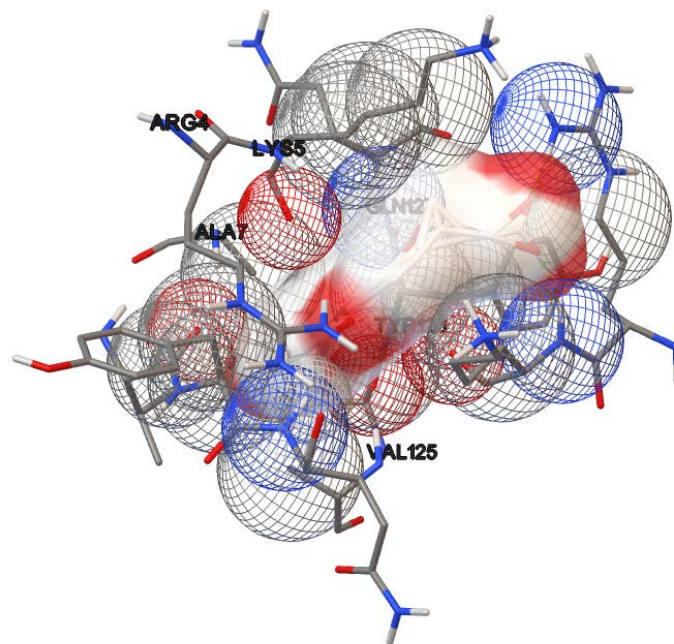

**6m71: RNA-dependent RNA pol**  
**DB00367: Levonorgestrel**

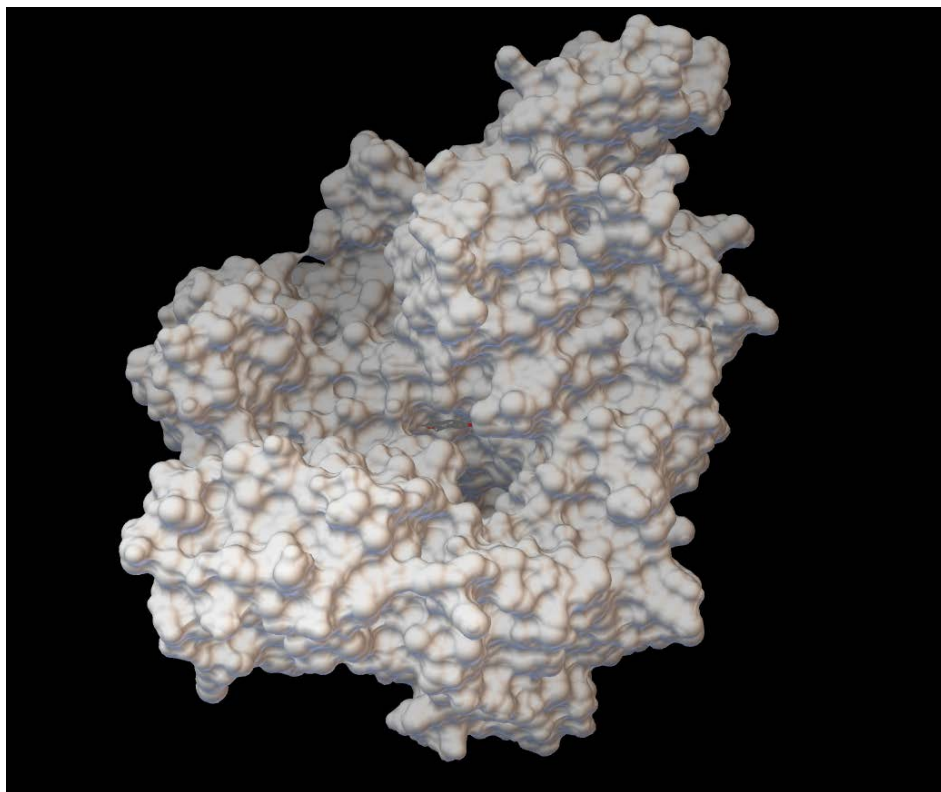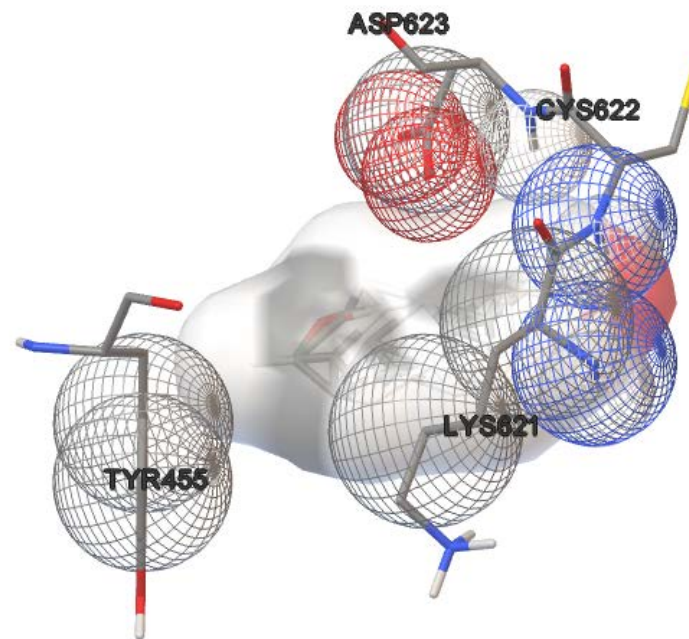



**6m71: RNA-dependent RNA pol**  
**DB00398: Sorafenib**

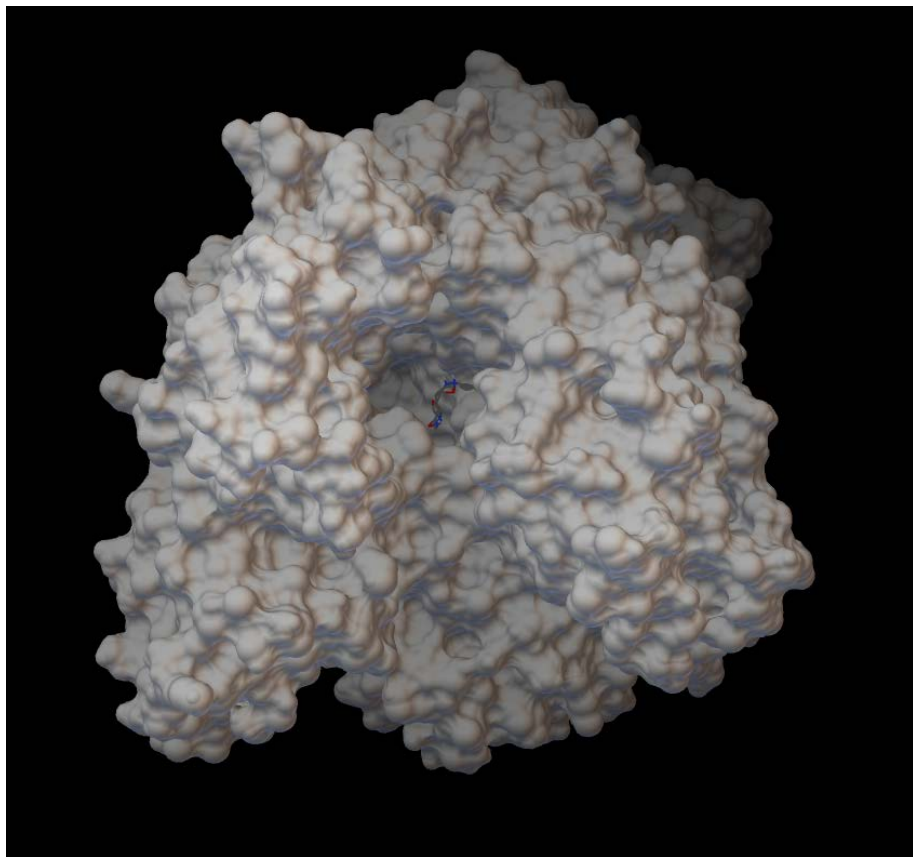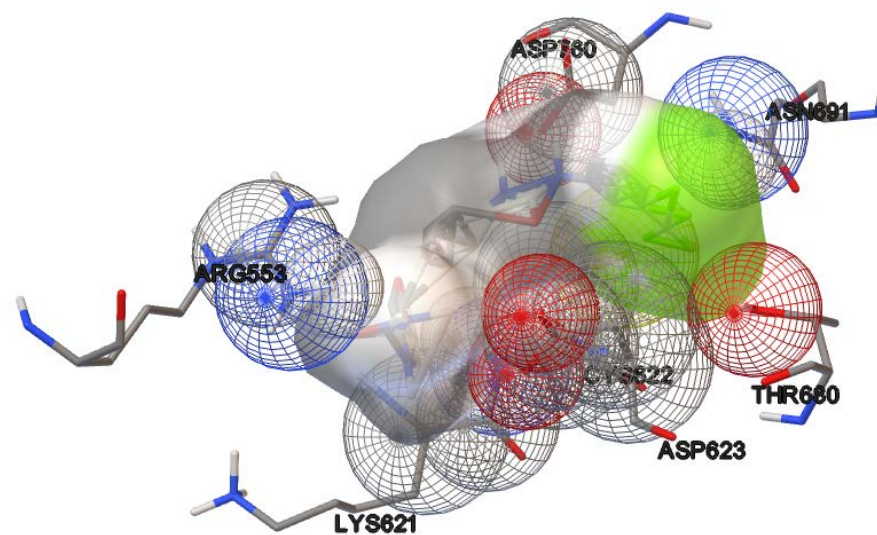

**6m71: RNA-dependent RNA pol**  
**DB00481: Raloxifene**

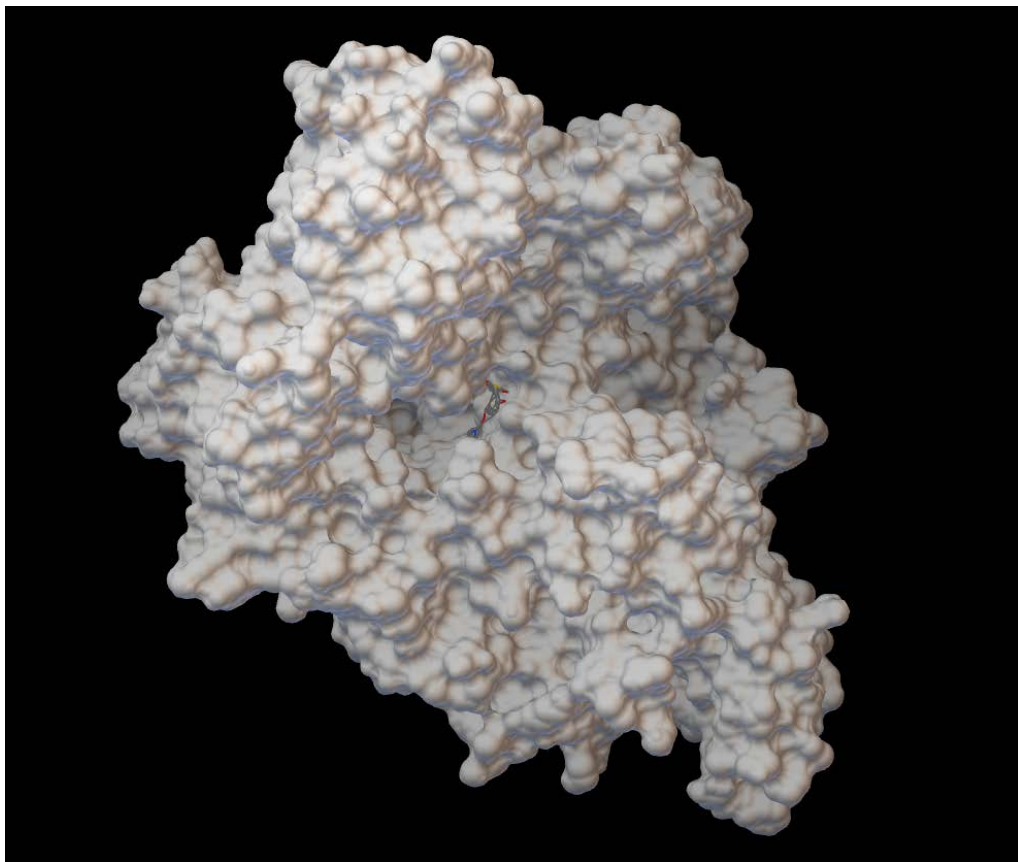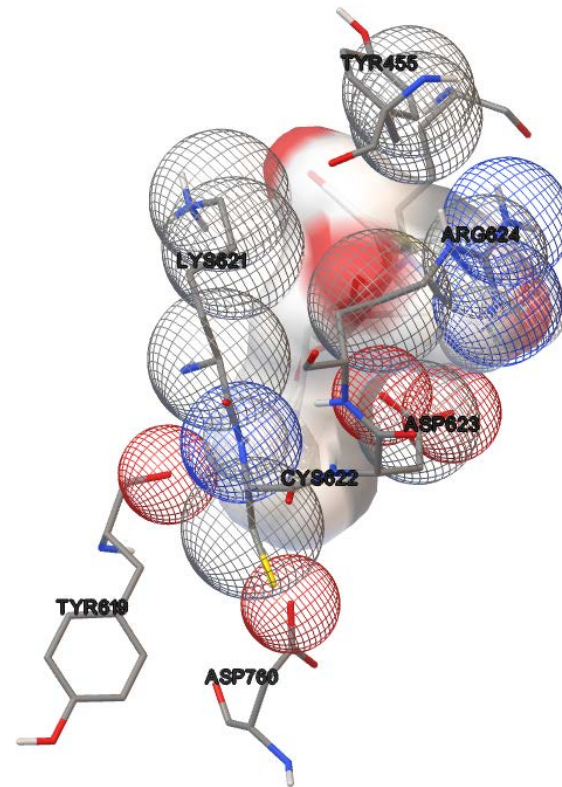

**6m71: RNA-dependent RNA pol**  
**DB01183: Naloxone**

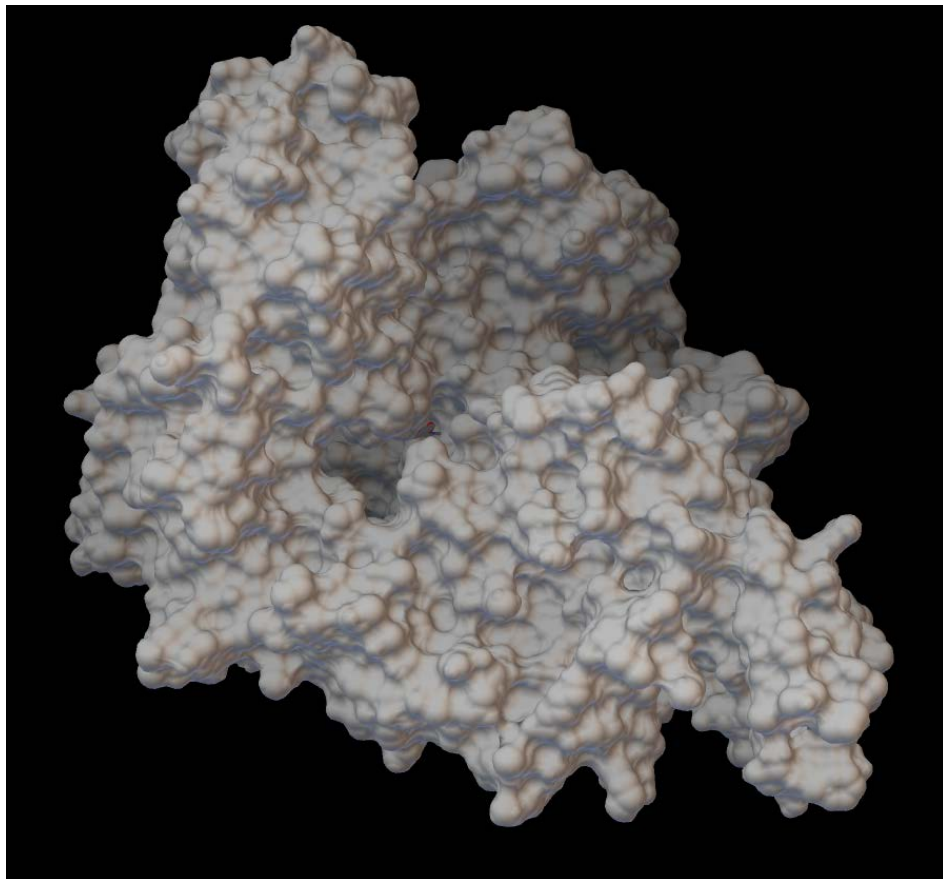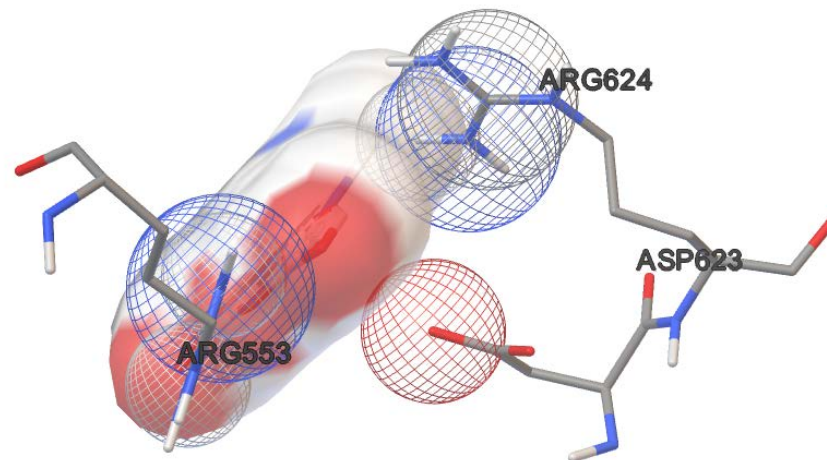



**6m71: RNA-dependent RNA pol**  
**DB08881: Vemurafenib**

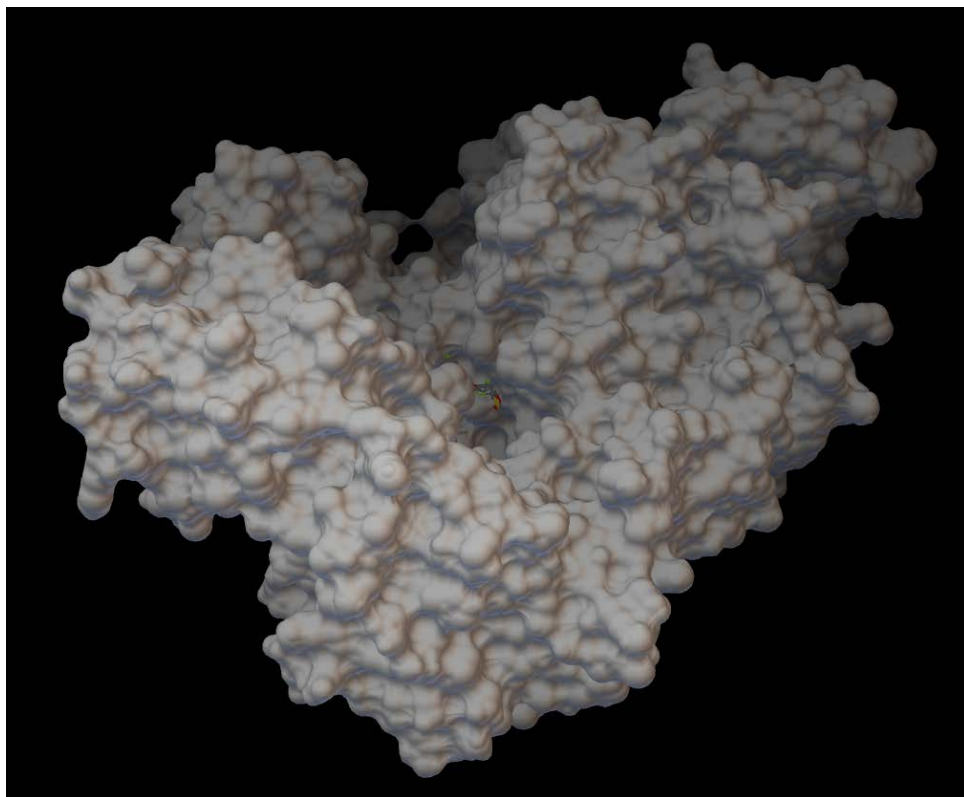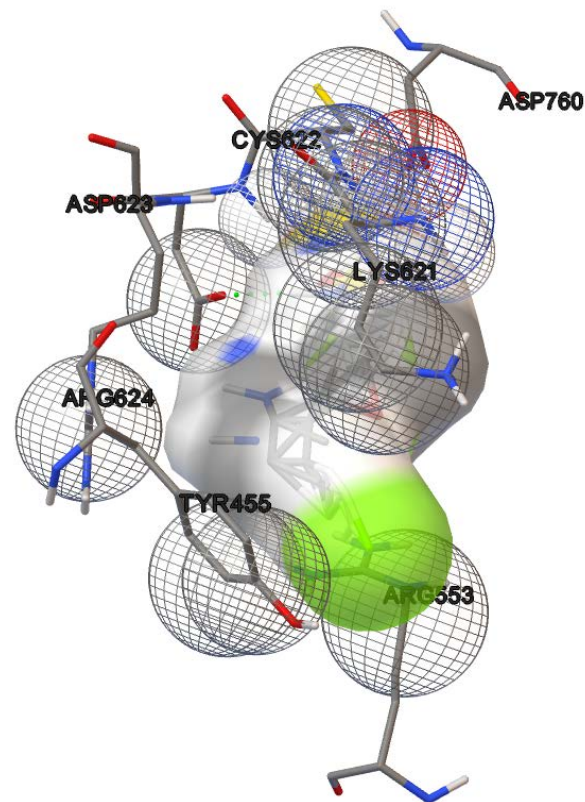



**6w01: NSP15 endoribonuclease**  
**DB00421: Spironolactone**

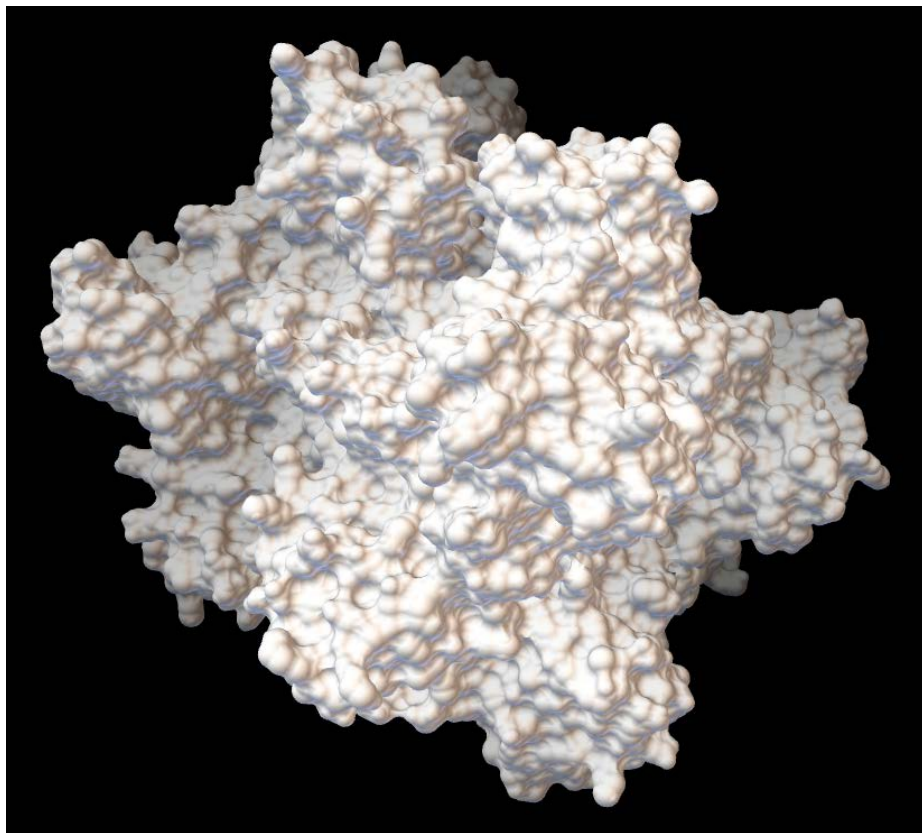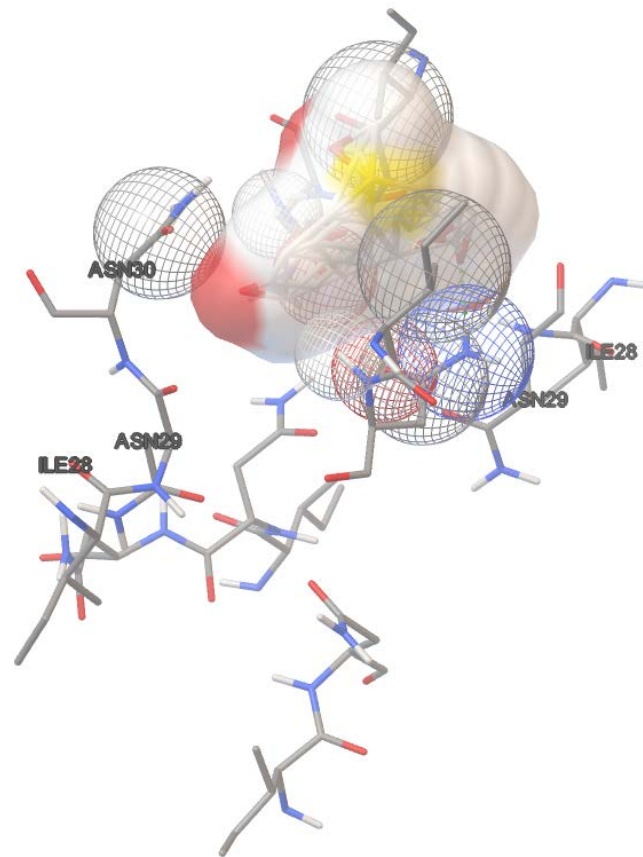

**6w01: NSP15 endoribonuclease**  
**DB00564: Carbamazepine**

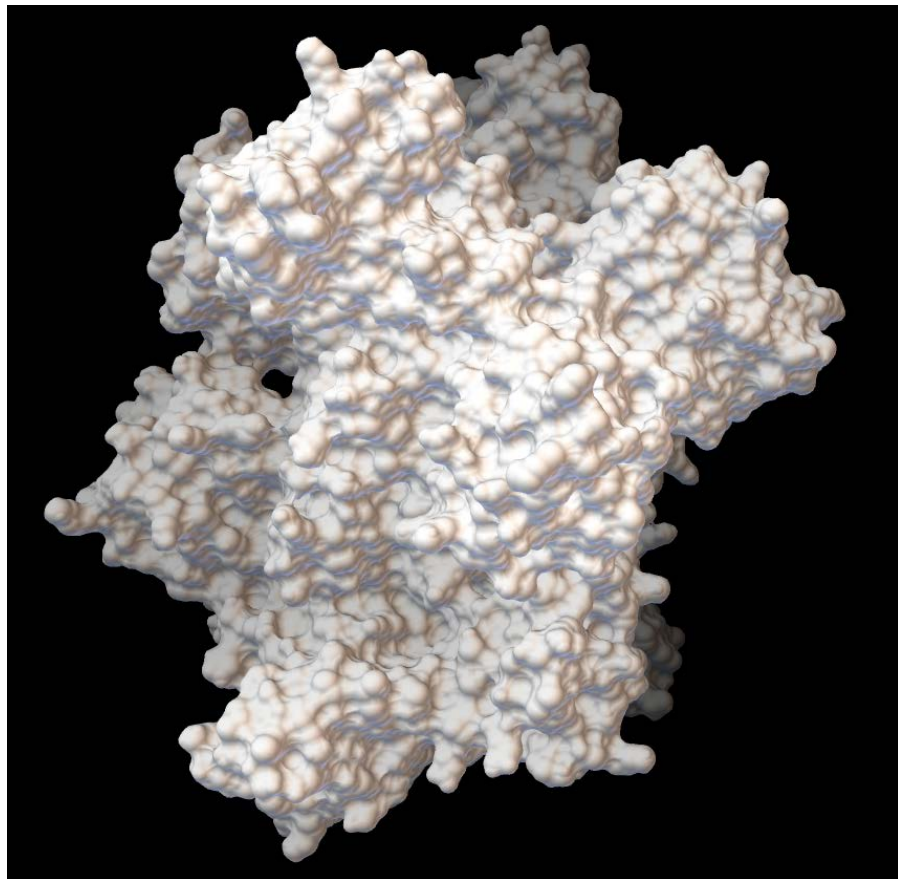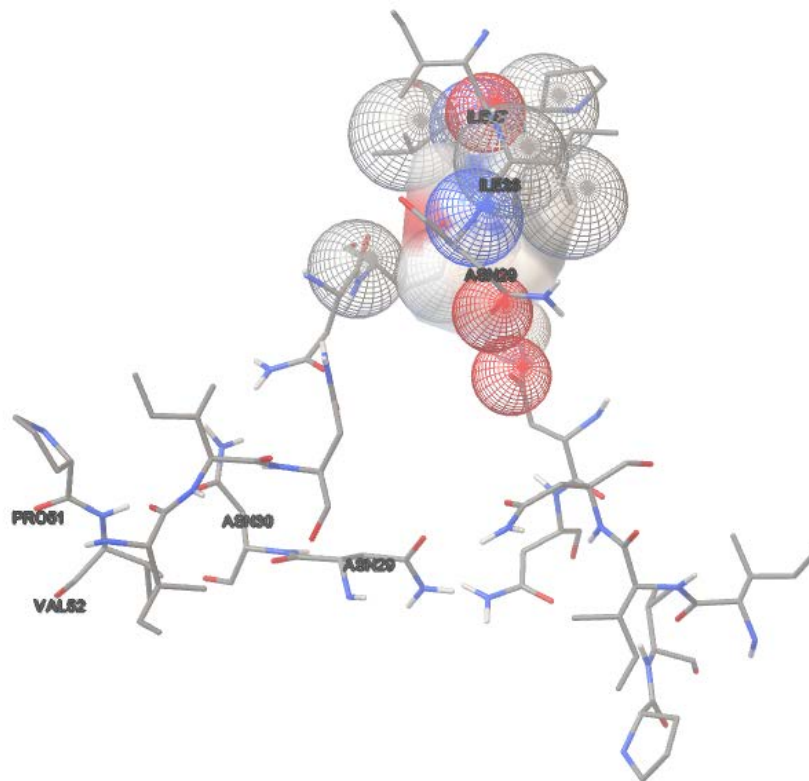

**6w01: NSP15 endoribonuclease**  
**DB00834:Mifepristone**

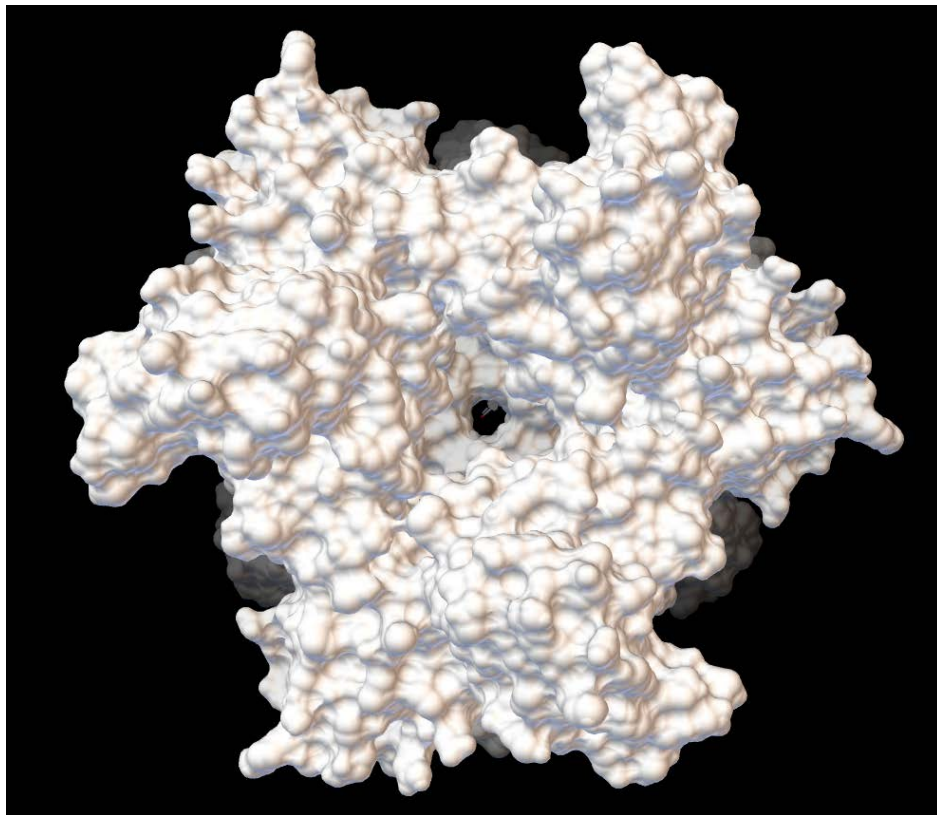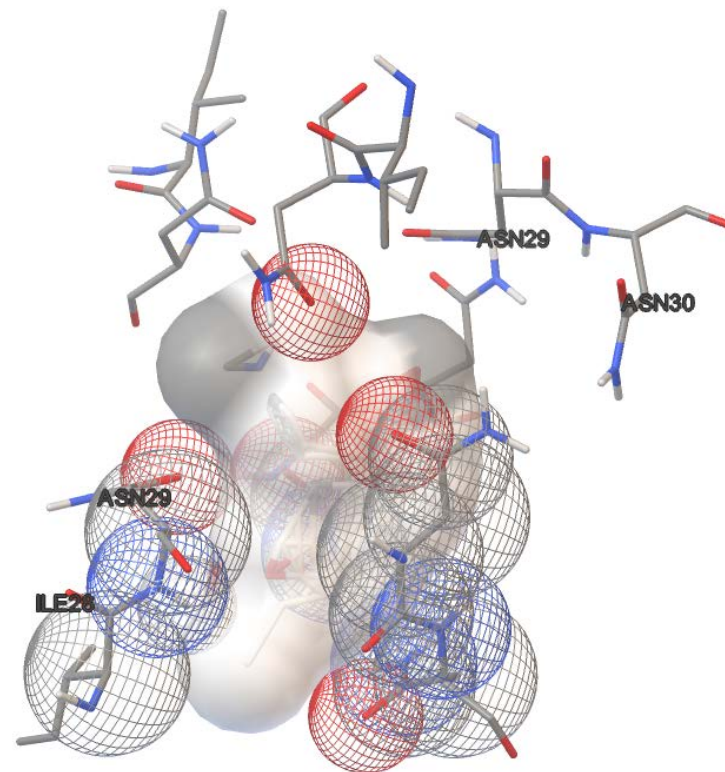



**6w01: NSP15 endoribonuclease**  
**DB01234: Dexamethasone**

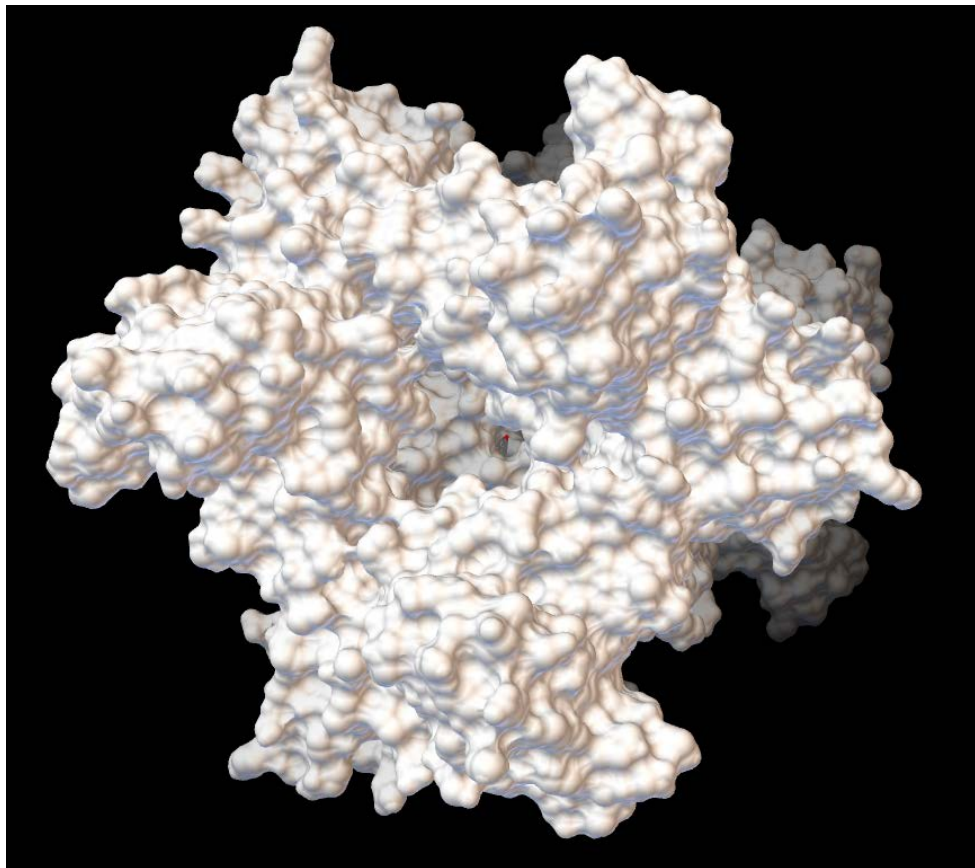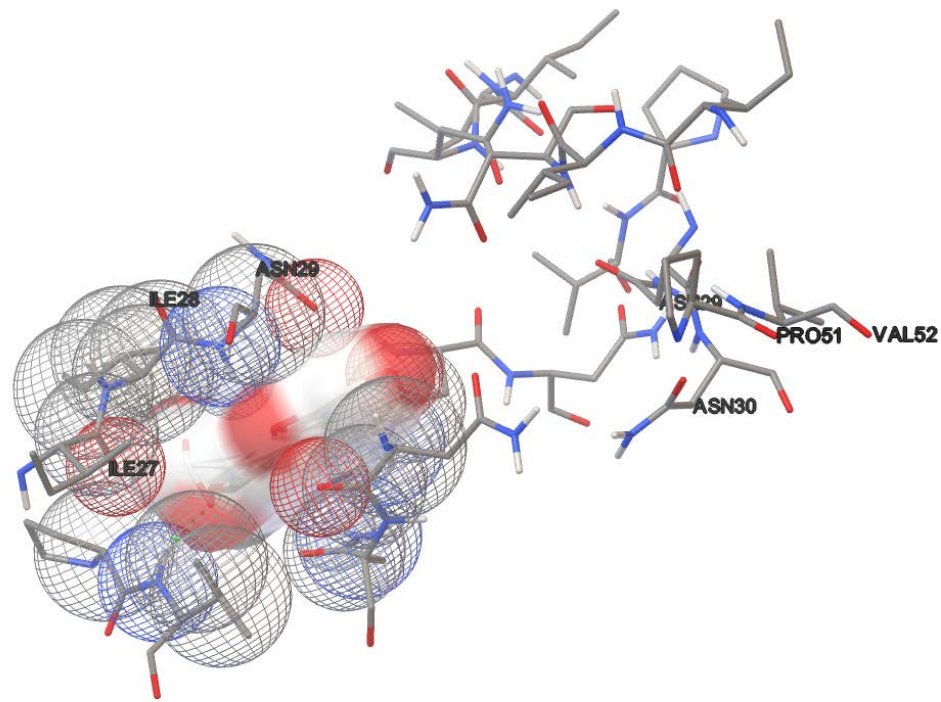



**6w01: NSP15 endoribonuclease**  
**DB04824: Phenolphthalein**

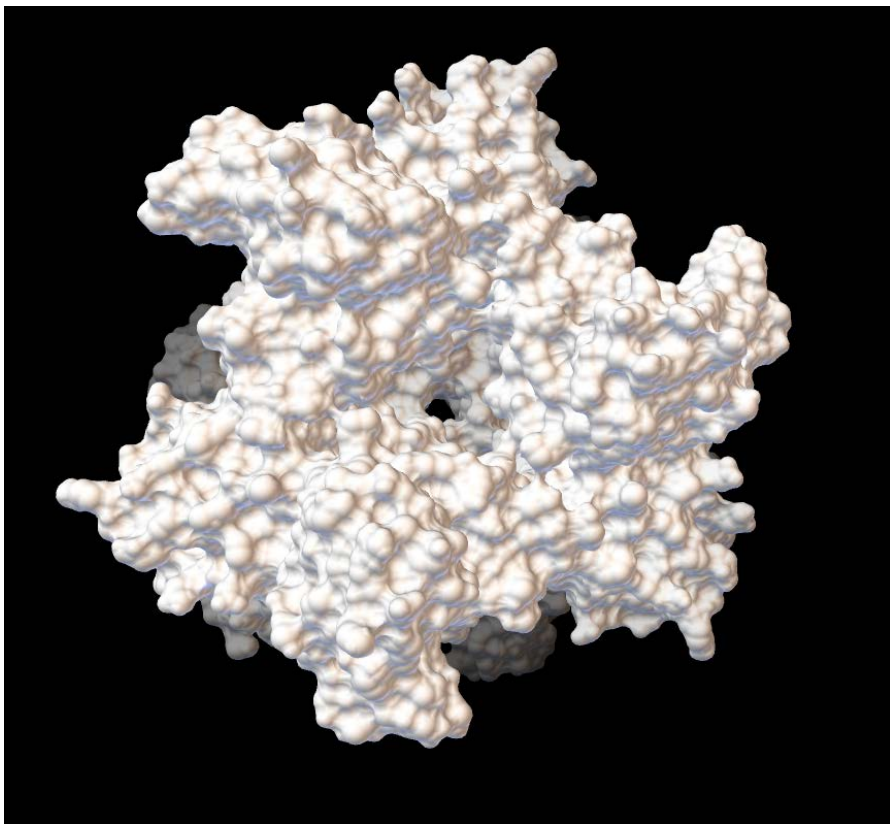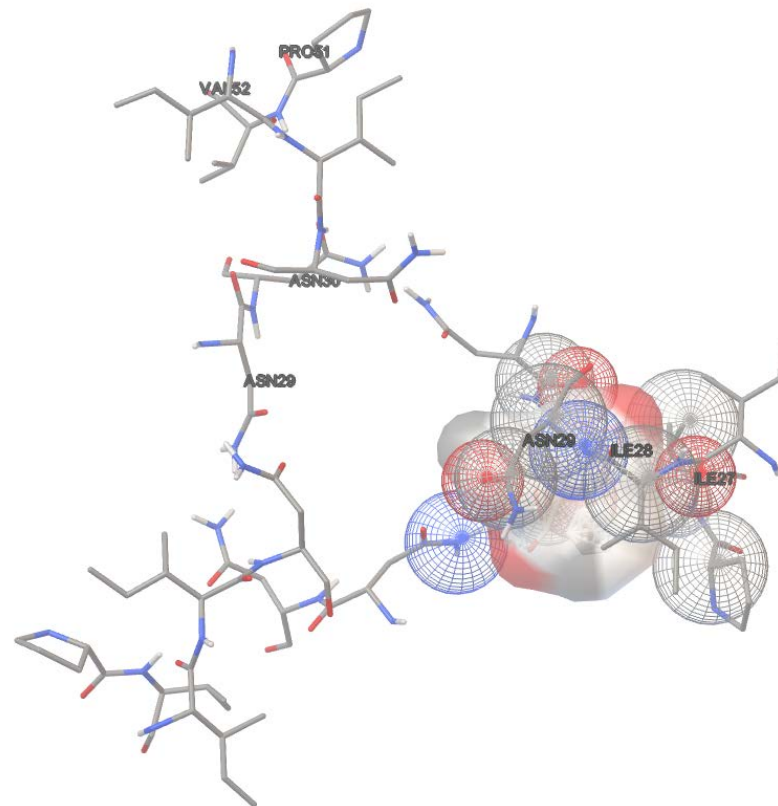

Supplement: s1 [file s1]
