# Supplementary material for: A COVID-19 Drug Repurposing Strategy through Quantitative Homological Similarities Using a Topological Data Analysis-Based Framework
Source: MDPI journal article supplement (doi:10.3390/pharmaceutics13040488), 2021-04-02
Supplement: s1 [file s1]

Supplementary Materials 3 for *A COVID-19 Drug Repurposing Strategy through Quantitative Homological Similarities Using a Topological Data Analysis-Based Framework*

## 1. Supplementary tables

| PDB ID | Residue count | EC number | SCOPE fold                                                               | Classification                       | CATH description                                     | Protein Family Annotation                            | Mean persistent simlarity |
|--------|---------------|-----------|--------------------------------------------------------------------------|--------------------------------------|------------------------------------------------------|------------------------------------------------------|---------------------------|
| 1d4L   | 332           | NA        | Lysosyme-Like                                                            | Hydrolase(O-Glycosyl)                | NA                                                   | Phage Lysosyme                                       | 0.906                     |
| 1A5Y   | 330           | 3.13.48   | (Phosphotyrosine Protein) Phosphatases II                                | Hydrolase                            | Protein Tyrosine Phosphatase Superfamily             | Protein-Tyrosine Phosphatase                         | 0.909                     |
| 1AAX   | 321           | 3.13.48   | (Phosphotyrosine Protein) Phosphatases II                                | Hydrolase                            | Protein Tyrosine Phosphatase Superfamily             | Protein-Tyrosine Phosphatase                         | 0.907                     |
| 1AB1   | 315           | 3.4.21.5  | NA                                                                       | Hydrolase/Hydrolase Inhibitor        | Trypsin-Like Serine Proteases                        | Trypsin                                              | 0.908                     |
| 1ADS   | 315           | 1.1.1.21  | Tim Beta/Alpha-Barrel                                                    | Oxidoreductase                       | Nadp-Dependent Oxidoreductase                        | Aldo/Keto Reductase Family                           | 0.902                     |
| 1AEB   | 305           | 3.4.21.5  | NA                                                                       | Hydrolase/Hydrolase Inhibitor        | Trypsin-Like Serine Proteases                        | Trypsin                                              | 0.905                     |
| 1AFE   | 305           | 3.4.21.5  | NA                                                                       | Hydrolase/Hydrolase Inhibitor        | Trypsin-Like Serine Proteases                        | Trypsin                                              | 0.912                     |
| 1AB8   | 307           | 3.4.21.5  | NA                                                                       | Blood Clotting/Hydrolase Inhibitor   | Trypsin-Like Serine Proteases                        | Trypsin                                              | 0.902                     |
| 1AB0   | 282           | 2.5.1.15  | Tim Beta/Alpha-Barrel                                                    | Synthase                             | Dihydropyrimate (Dhp) Synthetase                     | Protein Binding Enzyme                               | 0.900                     |
| 1AY6   | 308           | 3.4.21.5  | NA                                                                       | Hydrolase/Hydrolase Inhibitor        | Trypsin-Like Serine Proteases                        | Trypsin                                              | 0.903                     |
| 1AZ2   | 315           | 1.1.1.21  | Tim Beta/Alpha-Barrel                                                    | Oxidoreductase                       | Nadp-Dependent Oxidoreductase                        | Aldo/Keto Reductase Family                           | 0.915                     |
| 1CIW   | 306           | 3.4.21.5  | NA                                                                       | Hydrolase/Hydrolase Inhibitor        | Trypsin-Like Serine Proteases                        | Trypsin                                              | 0.900                     |
| 1C4Y   | 308           | 3.4.21.5  | Trypsin-Like Serine Proteases                                            | Hydrolase/Hydrolase Inhibitor        | NA                                                   | Thrombin Light Chain                                 | 0.900                     |
| 1C5L   | 305           | 3.4.21.5  | NA                                                                       | Blood Clotting/Hydrolase Inhibitor   | Trypsin-Like Serine Proteases                        | Trypsin                                              | 0.903                     |
| 1CSN   | 305           | 3.4.21.5  | NA                                                                       | Hydrolase/Hydrolase Inhibitor        | Trypsin-Like Serine Proteases                        | Trypsin                                              | 0.907                     |
| 1DXT   | 307           | 3.4.21.5  | Trypsin-Like Serine Proteases                                            | Hydrolase/Hydrolase Inhibitor        | NA                                                   | Thrombin Light Chain                                 | 0.902                     |
| 1DMA   | 306           | NA        | Trypsin-Like Serine Proteases                                            | Hydrolase                            | NA                                                   | Thrombin Light Chain                                 | 0.905                     |
| 1DWC   | 306           | 3.4.21.5  | NA                                                                       | Hydrolase/Hydrolase Inhibitor        | Trypsin-Like Serine Proteases                        | Trypsin                                              | 0.901                     |
| 1E25   | 282           | 3.5.2.6   | Beta-Lactamase/Transpeptidase-Like                                       | Hydrolase                            | Di-Peptidase/Beta-Lactamase Superfamily              | Beta-Lactamase Enzyme Family                         | 0.912                     |
| 1EB1   | 297           | NA        | NA                                                                       | Hydrolase/Hydrolase Inhibitor        | NA                                                   | NA                                                   | 0.904                     |
| 1EEO   | 332           | 3.13.48   | (Phosphotyrosine Protein) Phosphatases II                                | Hydrolase/Hydrolase Substrate        | Protein Tyrosine Phosphatase Superfamily             | Protein-Tyrosine Phosphatase                         | 0.913                     |
| 1EL3   | 316           | 1.1.1.21  | Tim Beta/Alpha-Barrel                                                    | Oxidoreductase                       | Nadp-Dependent Oxidoreductase                        | Aldo/Keto Reductase Family                           | 0.924                     |
| 1ENY   | 268           | NA        | Nad(P)-Binding Rossmann-Fold Domains                                     | Oxidoreductase                       | Nad(P)-Binding Rossmann-Like Domain                  | Enoyl-(Acyl Carrier Protein) Reductase               | 0.906                     |
| 1G30   | 306           | 3.4.21.5  | Trypsin-Like Serine Proteases                                            | Hydrolase/Hydrolase Inhibitor        | NA                                                   | Thrombin Light Chain                                 | 0.909                     |
| 1G32   | 306           | 3.4.21.5  | Trypsin-Like Serine Proteases                                            | Hydrolase/Hydrolase Inhibitor        | NA                                                   | Thrombin Light Chain                                 | 0.906                     |
| 1GHV   | 304           | 3.4.21.5  | NA                                                                       | Hydrolase/Hydrolase Inhibitor        | Trypsin-Like Serine Proteases                        | Trypsin                                              | 0.910                     |
| 1GJ5   | 305           | 3.4.21.5  | NA                                                                       | Blood Clotting/Hydrolase/Inhibitor   | Trypsin-Like Serine Proteases                        | Trypsin                                              | 0.901                     |
| 1H81   | 290           | 3.4.21.5  | NA                                                                       | Hydrolase/Hydrolase Inhibitor        | Trypsin-Like Serine Proteases                        | Trypsin                                              | 0.903                     |
| 1IAH   | 305           | 3.4.21.5  | NA                                                                       | Complex(Serine Proteinase/Inhibitor) | Trypsin-Like Serine Proteases                        | Trypsin                                              | 0.912                     |
| 1IAI   | 295           | 3.4.21.5  | NA                                                                       | Hydrolase/Hydrolase Inhibitor        | Trypsin-Like Serine Proteases                        | Trypsin                                              | 0.904                     |
| 1HDT   | 304           | 3.4.21.5  | NA                                                                       | Hydrolase/Hydrolase Inhibitor        | Trypsin-Like Serine Proteases                        | Trypsin                                              | 0.910                     |
| 1IHS   | 316           | 3.4.21.5  | NA                                                                       | Hydrolase/Hydrolase Inhibitor        | Trypsin-Like Serine Proteases                        | Trypsin                                              | 0.912                     |
| 1JWT   | 305           | 3.4.21.5  | Trypsin-Like Serine Proteases                                            | Hydrolase                            | Trypsin-Like Serine Proteases                        | Thrombin Light Chain                                 | 0.904                     |
| 1KAV   | 298           | 3.13.48   | (Phosphotyrosine Protein) Phosphatases II                                | Hydrolase                            | Protein Tyrosine Phosphatase Superfamily             | Protein-Tyrosine Phosphatase                         | 0.903                     |
| 1KW0   | 325           | 1.14.16.1 | Aromatic Aminoacid Monooxygenases, Catalytic And Oligomerization Domains | Oxidoreductase                       | Phenylalanine Hydroxylase                            | Bioprotein-Dependent Aromatic Amino Acid Hydroxylase | 0.907                     |
| 1MAR   | 315           | 1.1.1.21  | Tim Beta/Alpha-Barrel                                                    | Oxidoreductase(Nadp)                 | NA                                                   | Aldo/Keto Reductase Family                           | 0.921                     |
| 1MMK   | 325           | 1.14.16.1 | Aromatic Aminoacid Monooxygenases, Catalytic And Oligomerization Domains | Oxidoreductase                       | Phenylalanine Hydroxylase                            | Bioprotein-Dependent Aromatic Amino Acid Hydroxylase | 0.921                     |
| 1MMT   | 325           | 1.14.16.1 | Aromatic Aminoacid Monooxygenases, Catalytic And Oligomerization Domains | Oxidoreductase                       | Phenylalanine Hydroxylase                            | Bioprotein-Dependent Aromatic Amino Acid Hydroxylase | 0.906                     |
| 1MRQ   | 323           | 1.1.1.149 | Tim Beta/Alpha-Barrel                                                    | Oxidoreductase                       | Nadp-Dependent Oxidoreductase                        | Aldo/Keto Reductase Family                           | 0.904                     |
| 1MUE   | 306           | 3.4.21.5  | Trypsin-Like Serine Proteases                                            | Hydrolase Inhibitor                  | NA                                                   | Thrombin Light Chain                                 | 0.905                     |
| 1N09   | 306           | 3.4.21.5  | NA                                                                       | Hydrolase/Hydrolase Inhibitor        | Trypsin-Like Serine Proteases                        | Trypsin                                              | 0.901                     |
| 1NRN   | 318           | 3.4.21.5  | NA                                                                       | Serine Proteinase/Receptor           | Trypsin-Like Serine Proteases                        | Trypsin                                              | 0.907                     |
| 1NRS   | 311           | 3.4.21.5  | NA                                                                       | Hydrolase/Hydrolase Inhibitor        | Trypsin-Like Serine Proteases                        | Trypsin                                              | 0.905                     |
| 1NW9   | 375           | NA        | Inhibitor Of Apoptosis (Iap) Repeat                                      | Apoptosis                            | Inhibitor Of Apoptosis Protein (ZnBc-lap-1); Chain A | Inhibitor Of Apoptosis Domain                        | 0.901                     |
| 1OES   | 321           | 3.13.48   | (Phosphotyrosine Protein) Phosphatases II                                | Hydrolase                            | Protein Tyrosine Phosphatase Superfamily             | Protein-Tyrosine Phosphatase                         | 0.902                     |
| 1OEV   | 321           | 3.13.48   | (Phosphotyrosine Protein) Phosphatases II                                | Hydrolase                            | Protein Tyrosine Phosphatase Superfamily             | Protein-Tyrosine Phosphatase                         | 0.901                     |
| 1ONY   | 321           | 3.13.48   | (Phosphotyrosine Protein) Phosphatases II                                | Hydrolase                            | Protein Tyrosine Phosphatase Superfamily             | Protein-Tyrosine Phosphatase                         | 0.915                     |
| 1PF7   | 289           | 2.4.2.1   | Phosphorylase/Hydrolase-Like                                             | Transferase                          | NA                                                   | Phosphorylase Superfamily                            | 0.912                     |
| 1PME   | 380           | 2.7.1.-   | Protein Kinase-Like (Pk-Like)                                            | Transferase                          | Phosphorylase Kinase; Domain 1                       | Protein Kinase Domain                                | 0.916                     |
| 1PMU   | 364           | 2.7.1.-   | Protein Kinase-Like (Pk-Like)                                            | Transferase                          | Phosphorylase Kinase; Domain 1                       | Protein Kinase Domain                                | 0.911                     |
| 1PTT   | 326           | 3.13.48   | (Phosphotyrosine Protein) Phosphatases II                                | Complex (Hydrolase/Peptide)          | Protein Tyrosine Phosphatase Superfamily             | Protein-Tyrosine Phosphatase                         | 0.911                     |
| 1PTV   | 321           | 3.13.48   | (Phosphotyrosine Protein) Phosphatases II                                | Complex (Hydrolase/Peptide)          | Protein Tyrosine Phosphatase Superfamily             | Protein-Tyrosine Phosphatase                         | 0.905                     |
| 1PTY   | 321           | 3.13.48   | (Phosphotyrosine Protein) Phosphatases II                                | Hydrolase                            | Protein Tyrosine Phosphatase Superfamily             | Protein-Tyrosine Phosphatase                         | 0.902                     |
| 1PWL   | 316           | 1.1.1.21  | Tim Beta/Alpha-Barrel                                                    | Oxidoreductase                       | Nadp-Dependent Oxidoreductase                        | Aldo/Keto Reductase Family                           | 0.910                     |
| 1PWM   | 316           | 1.1.1.21  | Tim Beta/Alpha-Barrel                                                    | Oxidoreductase                       | Nadp-Dependent Oxidoreductase                        | Aldo/Keto Reductase Family                           | 0.920                     |
| 1PWY   | 288           | 2.4.2.1   | Phosphorylase/Hydrolase-Like                                             | Transferase                          | NA                                                   | Phosphorylase Superfamily                            | 0.902                     |
| 1QBV   | 306           | NA        | NA                                                                       | Hydrolase/Hydrolase Inhibitor        | NA                                                   | NA                                                   | 0.900                     |
| 1QBB   | 305           | 3.4.21.5  | Trypsin-Like Serine Proteases                                            | Blood Clotting/Hydrolase Inhibitor   | NA                                                   | Thrombin Light Chain                                 | 0.900                     |
| 1QUR   | 303           | NA        | NA                                                                       | Hydrolase/Hydrolase Inhibitor        | Trypsin-Like Serine Proteases                        | Trypsin                                              | 0.906                     |
| 1RCT   | 288           | 2.4.2.1   | Phosphorylase/Hydrolase-Like                                             | Transferase                          | NA                                                   | Phosphorylase Superfamily                            | 0.903                     |
| 1RWS   | 301           | 2.7.1.37  | NA                                                                       | Transferase                          | Transferase(Phosphotransferase) Domain 1             | Protein Kinase Domain                                | 0.913                     |
| 1S2A   | 331           | 1.1.1.213 | Tim Beta/Alpha-Barrel                                                    | Oxidoreductase                       | Nadp-Dependent Oxidoreductase                        | Aldo/Keto Reductase Family                           | 0.905                     |
| 1S2C   | 331           | 1.1.1.213 | Tim Beta/Alpha-Barrel                                                    | Oxidoreductase                       | Nadp-Dependent Oxidoreductase                        | Aldo/Keto Reductase Family                           | 0.904                     |
| 1SVC   | 384           | NA        | NA                                                                       | Transcription/Dna                    | NA                                                   | NA                                                   | 0.906                     |
| 1T40   | 316           | 1.1.1.21  | Tim Beta/Alpha-Barrel                                                    | Oxidoreductase                       | Nadp-Dependent Oxidoreductase                        | Aldo/Keto Reductase Family                           | 0.916                     |
| 1T46   | 298           | 3.13.48   | (Phosphotyrosine Protein) Phosphatases II                                | Hydrolase                            | Protein Tyrosine Phosphatase Superfamily             | Protein-Tyrosine Phosphatase                         | 0.906                     |
| 1THH   | 308           | 3.4.21.5  | NA                                                                       | Hydrolase(Serine Proteinase)         | Trypsin-Like Serine Proteases                        | Trypsin                                              | 0.903                     |
| 1TMB   | 313           | 3.4.21.5  | NA                                                                       | Hydrolase/Hydrolase Inhibitor        | Trypsin-Like Serine Proteases                        | Trypsin                                              | 0.905                     |
| 1TMT   | 316           | 3.4.21.5  | NA                                                                       | Hydrolase/Hydrolase Inhibitor        | Trypsin-Like Serine Proteases                        | Trypsin                                              | 0.909                     |
| 1UMA   | 305           | 3.4.21.5  | NA                                                                       | Hydrolase/Hydrolase Inhibitor        | Trypsin-Like Serine Proteases                        | Trypsin                                              | 0.914                     |
| 1V41   | 288           | 2.4.2.1   | Phosphorylase/Hydrolase-Like                                             | Transferase                          | NA                                                   | Phosphorylase Superfamily                            | 0.921                     |
| 1VJY   | 303           | 2.7.1.37  | Protein Kinase-Like (Pk-Like)                                            | Transferase                          | Phosphorylase Kinase; Domain 1                       | Protein Kinase Domain                                | 0.931                     |
| 1WAY   | 305           | 3.4.21.5  | NA                                                                       | Hydrolase/Hydrolase Inhibitor        | NA                                                   | Thrombin Light Chain                                 | 0.903                     |
| 1WBG   | 305           | 3.4.21.5  | NA                                                                       | Hydrolase/Hydrolase Inhibitor        | NA                                                   | Thrombin Light Chain                                 | 0.905                     |
| 1X06   | 316           | 1.1.1.21  | Tim Beta/Alpha-Barrel                                                    | Oxidoreductase                       | Nadp-Dependent Oxidoreductase                        | Aldo/Keto Reductase Family                           | 0.921                     |
| 1X97   | 316           | 1.1.1.21  | Tim Beta/Alpha-Barrel                                                    | Oxidoreductase                       | Nadp-Dependent Oxidoreductase                        | Aldo/Keto Reductase Family                           | 0.916                     |
| 1X98   | 316           | 1.1.1.21  | Tim Beta/Alpha-Barrel                                                    | Oxidoreductase                       | Nadp-Dependent Oxidoreductase                        | Aldo/Keto Reductase Family                           | 0.912                     |
| 1XAS   | 299           | 3.2.1.8   | Tim Beta/Alpha-Barrel                                                    | Xylanase A                           | NA                                                   | Glycosyl Hydrolase Family 10                         | 0.921                     |
| 1XMI   | 305           | 3.4.21.5  | Trypsin-Like Serine Proteases                                            | Hydrolase/Hydrolase Inhibitor        | Trypsin-Like Serine Proteases                        | Trypsin                                              | 0.900                     |
| 1YRY   | 289           | 2.4.2.1   | Phosphorylase/Hydrolase-Like                                             | Transferase                          | NA                                                   | Phosphorylase Superfamily                            | 0.902                     |
| 1Z4N   | 319           | 1.1.1.21  | Tim Beta/Alpha-Barrel                                                    | Oxidoreductase                       | Nadp-Dependent Oxidoreductase                        | Aldo/Keto Reductase Family                           | 0.930                     |
| 1Z89   | 316           | 1.1.1.21  | Tim Beta/Alpha-Barrel                                                    | Oxidoreductase                       | Nadp-Dependent Oxidoreductase                        | Aldo/Keto Reductase Family                           | 0.921                     |
| 1Z8A   | 316           | 1.1.1.21  | Tim Beta/Alpha-Barrel                                                    | Oxidoreductase                       | Nadp-Dependent Oxidoreductase                        | Aldo/Keto Reductase Family                           | 0.905                     |
| 1ZUA   | 317           | 1.1.1.-   | NA                                                                       | Oxidoreductase                       | Nadp-Dependent Oxidoreductase                        | Aldo/Keto Reductase Family                           | 0.913                     |

| PDB ID | Residue count | EC number | SCOPE fold                                | Classification                          | CATH description                         | Protein Family Annotation                                  | Mean persistent similarity |
|--------|---------------|-----------|-------------------------------------------|-----------------------------------------|------------------------------------------|------------------------------------------------------------|----------------------------|
| 2ACQ   | 315           | 1.1.1.21  | Tim Beta/Alpha-Barrel                     | Oxidoreductase                          | Nadp-Dependent Oxidoreductase            | Aldo/Keto Reductase Family                                 | 0.905                      |
| 2ACR   | 315           | 1.1.1.21  | Tim Beta/Alpha-Barrel                     | Oxidoreductase                          | Nadp-Dependent Oxidoreductase            | Aldo/Keto Reductase Family                                 | 0.902                      |
| 2ACU   | 315           | 1.1.1.21  | Tim Beta/Alpha-Barrel                     | Oxidoreductase                          | Nadp-Dependent Oxidoreductase            | Aldo/Keto Reductase Family                                 | 0.921                      |
| 2AGT   | 319           | 1.1.1.21  | NA                                        | Oxidoreductase                          | Nadp-Dependent Oxidoreductase            | Aldo/Keto Reductase Family                                 | 0.915                      |
| 2HGD   | 321           | 3.1.3.48  | (Phosphotyrosine Protein) Phosphatases II | Hydrolase                               | Protein Tyrosine Phosphatase Superfamily | Protein-Tyrosine Phosphatase                               | 0.900                      |
| 2BGE   | 321           | 3.1.3.48  | (Phosphotyrosine Protein) Phosphatases II | Hydrolase                               | Protein Tyrosine Phosphatase Superfamily | Protein-Tyrosine Phosphatase                               | 0.912                      |
| 2C93   | 307           | 3.4.21.5  | NA                                        | Hydrolase/Hydrolase Inhibitor           | NA                                       | Thrombin Light Chain                                       | 0.903                      |
| 2CMA   | 327           | 3.1.3.48  | (Phosphotyrosine Protein) Phosphatases II | Hydrolase                               | Protein Tyrosine Phosphatase Superfamily | Protein-Tyrosine Phosphatase                               | 0.905                      |
| 2DUZ   | 316           | 1.1.1.21  | Tim Beta/Alpha-Barrel                     | Oxidoreductase                          | Nadp-Dependent Oxidoreductase            | Aldo/Keto Reductase Family                                 | 0.902                      |
| 2DV0   | 316           | 1.1.1.21  | Tim Beta/Alpha-Barrel                     | Oxidoreductase                          | Nadp-Dependent Oxidoreductase            | Aldo/Keto Reductase Family                                 | 0.910                      |
| 2F2K   | 316           | 1.1.1.21  | Tim Beta/Alpha-Barrel                     | Oxidoreductase                          | Nadp-Dependent Oxidoreductase            | Aldo/Keto Reductase Family                                 | 0.911                      |
| 2F6F   | 302           | 3.1.3.48  | NA                                        | Hydrolase                               | Protein Tyrosine Phosphatase Superfamily | Protein-Tyrosine Phosphatase                               | 0.902                      |
| 2FGB   | 323           | 1.1.1.62  | Tim Beta/Alpha-Barrel                     | Oxidoreductase                          | Nadp-Dependent Oxidoreductase            | Aldo/Keto Reductase Family                                 | 0.906                      |
| 2FZ8   | 316           | 1.1.1.21  | Tim Beta/Alpha-Barrel                     | Oxidoreductase                          | Nadp-Dependent Oxidoreductase            | Aldo/Keto Reductase Family                                 | 0.906                      |
| 2FZ9   | 316           | 1.1.1.21  | Tim Beta/Alpha-Barrel                     | Oxidoreductase                          | Nadp-Dependent Oxidoreductase            | Aldo/Keto Reductase Family                                 | 0.915                      |
| 2FZB   | 316           | 1.1.1.21  | Tim Beta/Alpha-Barrel                     | Oxidoreductase                          | Nadp-Dependent Oxidoreductase            | Aldo/Keto Reductase Family                                 | 0.920                      |
| 2G3J   | 313           | 3.2.1.8   | NA                                        | Hydrolase                               | Glycosidase                              | Glycosyl Hydrolase Family 10                               | 0.915                      |
| 2GGT   | 328           | NA        | Thioredoxin Fold                          | Chaperone                               | Glutaredoxin                             | Sco1/Sene                                                  | 0.927                      |
| 2H4G   | 299           | 3.1.3.48  | (Phosphotyrosine Protein) Phosphatases II | Hydrolase                               | Protein Tyrosine Phosphatase Superfamily | Protein-Tyrosine Phosphatase                               | 0.902                      |
| 2HV5   | 316           | 1.1.1.21  | Tim Beta/Alpha-Barrel                     | Oxidoreductase                          | Nadp-Dependent Oxidoreductase            | Aldo/Keto Reductase Family                                 | 0.913                      |
| 2HVN   | 316           | 1.1.1.21  | Tim Beta/Alpha-Barrel                     | Oxidoreductase                          | Nadp-Dependent Oxidoreductase            | Aldo/Keto Reductase Family                                 | 0.918                      |
| 2HVO   | 316           | 1.1.1.21  | Tim Beta/Alpha-Barrel                     | Oxidoreductase                          | Nadp-Dependent Oxidoreductase            | Aldo/Keto Reductase Family                                 | 0.912                      |
| 2IKG   | 316           | 1.1.1.21  | Tim Beta/Alpha-Barrel                     | Oxidoreductase                          | Nadp-Dependent Oxidoreductase            | Aldo/Keto Reductase Family                                 | 0.916                      |
| 2IKH   | 316           | 1.1.1.21  | Tim Beta/Alpha-Barrel                     | Oxidoreductase                          | Nadp-Dependent Oxidoreductase            | Aldo/Keto Reductase Family                                 | 0.914                      |
| 2IKJ   | 316           | 1.1.1.21  | Tim Beta/Alpha-Barrel                     | Oxidoreductase                          | Nadp-Dependent Oxidoreductase            | Aldo/Keto Reductase Family                                 | 0.905                      |
| 2INE   | 315           | 1.1.1.21  | Tim Beta/Alpha-Barrel                     | Oxidoreductase                          | Nadp-Dependent Oxidoreductase            | Aldo/Keto Reductase Family                                 | 0.909                      |
| 2INZ   | 315           | 1.1.1.21  | Tim Beta/Alpha-Barrel                     | Oxidoreductase                          | Nadp-Dependent Oxidoreductase            | Aldo/Keto Reductase Family                                 | 0.903                      |
| 2IQ0   | 315           | 1.1.1.21  | Tim Beta/Alpha-Barrel                     | Oxidoreductase                          | Nadp-Dependent Oxidoreductase            | Aldo/Keto Reductase Family                                 | 0.909                      |
| 2IQD   | 315           | 1.1.1.21  | Tim Beta/Alpha-Barrel                     | Oxidoreductase                          | Nadp-Dependent Oxidoreductase            | Aldo/Keto Reductase Family                                 | 0.909                      |
| 2ISF   | 315           | 1.1.1.21  | Tim Beta/Alpha-Barrel                     | Oxidoreductase                          | Nadp-Dependent Oxidoreductase            | Aldo/Keto Reductase Family                                 | 0.905                      |
| 2I8T   | 316           | 1.1.1.21  | Tim Beta/Alpha-Barrel                     | Oxidoreductase                          | Nadp-Dependent Oxidoreductase            | Aldo/Keto Reductase Family                                 | 0.903                      |
| 2NVC   | 316           | 1.1.1.21  | Tim Beta/Alpha-Barrel                     | Oxidoreductase                          | Nadp-Dependent Oxidoreductase            | Aldo/Keto Reductase Family                                 | 0.913                      |
| 2PD5   | 316           | 1.1.1.21  | NA                                        | Oxidoreductase                          | Nadp-Dependent Oxidoreductase            | Aldo/Keto Reductase Family                                 | 0.928                      |
| 2PD9   | 316           | 1.1.1.21  | NA                                        | Oxidoreductase                          | Nadp-Dependent Oxidoreductase            | Aldo/Keto Reductase Family                                 | 0.907                      |
| 2PDB   | 316           | 1.1.1.21  | NA                                        | Oxidoreductase                          | Nadp-Dependent Oxidoreductase            | Aldo/Keto Reductase Family                                 | 0.918                      |
| 2PDC   | 316           | 1.1.1.21  | NA                                        | Oxidoreductase                          | Nadp-Dependent Oxidoreductase            | Aldo/Keto Reductase Family                                 | 0.923                      |
| 2PDF   | 316           | 1.1.1.21  | NA                                        | Oxidoreductase                          | Nadp-Dependent Oxidoreductase            | Aldo/Keto Reductase Family                                 | 0.924                      |
| 2PDG   | 316           | 1.1.1.21  | Tim Beta/Alpha-Barrel                     | Oxidoreductase                          | Nadp-Dependent Oxidoreductase            | Aldo/Keto Reductase Family                                 | 0.909                      |
| 2PDH   | 316           | 1.1.1.21  | NA                                        | Oxidoreductase                          | Nadp-Dependent Oxidoreductase            | Aldo/Keto Reductase Family                                 | 0.907                      |
| 2PDI   | 316           | 1.1.1.21  | NA                                        | Oxidoreductase                          | Nadp-Dependent Oxidoreductase            | Aldo/Keto Reductase Family                                 | 0.912                      |
| 2PDJ   | 316           | 1.1.1.21  | NA                                        | Oxidoreductase                          | Nadp-Dependent Oxidoreductase            | Aldo/Keto Reductase Family                                 | 0.903                      |
| 2PDR   | 316           | 1.1.1.21  | NA                                        | Oxidoreductase                          | Nadp-Dependent Oxidoreductase            | Aldo/Keto Reductase Family                                 | 0.912                      |
| 2PDL   | 316           | 1.1.1.21  | NA                                        | Oxidoreductase                          | Nadp-Dependent Oxidoreductase            | Aldo/Keto Reductase Family                                 | 0.917                      |
| 2PDN   | 316           | 1.1.1.21  | NA                                        | Oxidoreductase                          | Nadp-Dependent Oxidoreductase            | Aldo/Keto Reductase Family                                 | 0.927                      |
| 2PDP   | 316           | 1.1.1.21  | NA                                        | Oxidoreductase                          | Nadp-Dependent Oxidoreductase            | Aldo/Keto Reductase Family                                 | 0.914                      |
| 2PDQ   | 316           | 1.1.1.21  | NA                                        | Oxidoreductase                          | Nadp-Dependent Oxidoreductase            | Aldo/Keto Reductase Family                                 | 0.904                      |
| 2PDW   | 316           | 1.1.1.21  | NA                                        | Oxidoreductase                          | Nadp-Dependent Oxidoreductase            | Aldo/Keto Reductase Family                                 | 0.904                      |
| 2PEV   | 316           | 1.1.1.21  | Tim Beta/Alpha-Barrel                     | Oxidoreductase                          | Nadp-Dependent Oxidoreductase            | Aldo/Keto Reductase Family                                 | 0.903                      |
| 2PGQ   | 304           | 3.4.21.5  | NA                                        | Hydrolase/Hydrolase Inhibitor           | Epsilon-Thrombin, Subunit L              | Thrombin Light Chain                                       | 0.902                      |
| 2PZN   | 316           | 1.1.1.21  | Tim Beta/Alpha-Barrel                     | Oxidoreductase                          | Nadp-Dependent Oxidoreductase            | Aldo/Keto Reductase Family                                 | 0.925                      |
| 2Q0N   | 312           | 2.7.11.1  | NA                                        | Transferase                             | Phosphorylase Kinase; Domain 1           | Protein Kinase Domain                                      | 0.902                      |
| 2QBR   | 299           | 3.1.3.48  | NA                                        | Hydrolase                               | Protein Tyrosine Phosphatase Superfamily | Protein-Tyrosine Phosphatase                               | 0.900                      |
| 2R24   | 316           | 1.1.1.21  | NA                                        | Oxidoreductase                          | Nadp-Dependent Oxidoreductase            | Aldo/Keto Reductase Family                                 | 0.927                      |
| 2RLC   | 328           | 3.5.1.24  | NA                                        | Hydrolase                               | Penicillin V Acylase; Chain A            | Linear Amide C-N Hydrolases, Chologlycine Hydrolase Family | 0.910                      |
| 2WOT   | 306           | 2.7.11.30 | NA                                        | Transferase                             | Transferase(Phosphotransferase) Domain 1 | Protein Kinase Domain                                      | 0.901                      |
| 2WOU   | 306           | 2.7.11.30 | NA                                        | Transferase                             | Phosphorylase Kinase; Domain 1           | Protein Kinase Domain                                      | 0.917                      |
| 3BCJ   | 316           | 1.1.1.21  | Tim Beta/Alpha-Barrel                     | Oxidoreductase                          | Nadp-Dependent Oxidoreductase            | Aldo/Keto Reductase Family                                 | 0.903                      |
| 3C3U   | 323           | 1.1.1.149 | Tim Beta/Alpha-Barrel                     | Oxidoreductase                          | Nadp-Dependent Oxidoreductase            | Aldo/Keto Reductase Family                                 | 0.906                      |
| 3D1V   | 289           | 2.4.2.1   | NA                                        | Transferase                             | NA                                       | Phosphorylase Superfamily                                  | 0.903                      |
| 3D42   | 316           | 3.1.3.48  | NA                                        | Hydrolase                               | Protein Tyrosine Phosphatase Superfamily | Protein-Tyrosine Phosphatase                               | 0.930                      |
| 3D9C   | 321           | 3.1.3.48  | NA                                        | Hydrolase                               | Protein Tyrosine Phosphatase Superfamily | Protein-Tyrosine Phosphatase                               | 0.914                      |
| 3DN5   | 316           | 1.1.1.21  | NA                                        | Oxidoreductase                          | Nadp-Dependent Oxidoreductase            | Aldo/Keto Reductase Family                                 | 0.921                      |
| 3FMN   | 372           | 2.7.11.24 | NA                                        | Signaling Protein, Transferase          | Phosphorylase Kinase; Domain 1           | Protein Kinase Domain                                      | 0.906                      |
| 3G5E   | 319           | 1.1.1.21  | NA                                        | Oxidoreductase                          | Nadp-Dependent Oxidoreductase            | Aldo/Keto Reductase Family                                 | 0.919                      |
| 3GHR   | 316           | 1.1.1.21  | NA                                        | Oxidoreductase                          | Nadp-Dependent Oxidoreductase            | Aldo/Keto Reductase Family                                 | 0.901                      |
| 3GHS   | 316           | 1.1.1.21  | NA                                        | Oxidoreductase                          | Nadp-Dependent Oxidoreductase            | Aldo/Keto Reductase Family                                 | 0.904                      |
| 3GHT   | 316           | 1.1.1.21  | NA                                        | Oxidoreductase                          | Nadp-Dependent Oxidoreductase            | Aldo/Keto Reductase Family                                 | 0.912                      |
| 3GHU   | 316           | 1.1.1.21  | NA                                        | Oxidoreductase                          | Nadp-Dependent Oxidoreductase            | Aldo/Keto Reductase Family                                 | 0.915                      |
| 3GUG   | 323           | 1.1.1.-   | NA                                        | Oxidoreductase                          | Nadp-Dependent Oxidoreductase            | Aldo/Keto Reductase Family                                 | 0.903                      |
| 3HMM   | 303           | 2.7.11.30 | NA                                        | Transferase                             | Transferase(Phosphotransferase) Domain 1 | Protein Kinase Domain                                      | 0.912                      |
| 3HRB   | 359           | 2.7.11.24 | NA                                        | Transferase                             | Phosphorylase Kinase; Domain 1           | Protein Kinase Domain                                      | 0.915                      |
| 3INY   | 289           | 2.4.2.1   | NA                                        | Transferase                             | NA                                       | Phosphorylase Superfamily                                  | 0.924                      |
| 3IEN   | 316           | 1.1.1.21  | NA                                        | Oxidoreductase/Oxidoreductase Inhibitor | Nadp-Dependent Oxidoreductase            | Aldo/Keto Reductase Family                                 | 0.916                      |
| 3M0I   | 316           | 1.1.1.21  | NA                                        | Oxidoreductase/Oxidoreductase Inhibitor | Nadp-Dependent Oxidoreductase            | Aldo/Keto Reductase Family                                 | 0.910                      |
| 3M4H   | 316           | 1.1.1.21  | NA                                        | Oxidoreductase/Oxidoreductase Inhibitor | Nadp-Dependent Oxidoreductase            | Aldo/Keto Reductase Family                                 | 0.907                      |
| 3M64   | 316           | 1.1.1.21  | NA                                        | Oxidoreductase/Oxidoreductase Inhibitor | Nadp-Dependent Oxidoreductase            | Aldo/Keto Reductase Family                                 | 0.909                      |
| 3MB9   | 316           | 1.1.1.21  | NA                                        | Oxidoreductase/Oxidoreductase Inhibitor | Nadp-Dependent Oxidoreductase            | Aldo/Keto Reductase Family                                 | 0.919                      |
| 3MC5   | 316           | 1.1.1.21  | NA                                        | Oxidoreductase/Oxidoreductase Inhibitor | Nadp-Dependent Oxidoreductase            | Aldo/Keto Reductase Family                                 | 0.915                      |
| 3MFR   | 351           | 2.7.11.1  | NA                                        | Transferase                             | Phosphorylase Kinase; Domain 1           | Protein Kinase Domain                                      | 0.911                      |
| 3MFS   | 351           | 2.7.11.1  | NA                                        | Transferase                             | Phosphorylase Kinase; Domain 1           | Protein Kinase Domain                                      | 0.912                      |
| 3MFT   | 351           | 2.7.11.1  | NA                                        | Transferase                             | Transferase(Phosphotransferase) Domain 1 | Protein Kinase Domain                                      | 0.903                      |
| 3MFU   | 351           | 2.7.11.1  | NA                                        | Transferase                             | Phosphorylase Kinase; Domain 1           | Protein Kinase Domain                                      | 0.917                      |
| 3P2V   | 316           | 1.1.1.21  | NA                                        | Oxidoreductase/Oxidoreductase Inhibitor | Nadp-Dependent Oxidoreductase            | Aldo/Keto Reductase Family                                 | 0.921                      |
| 3QKP   | 321           | 3.1.3.48  | NA                                        | Hydrolase                               | Protein Tyrosine Phosphatase Superfamily | Protein-Tyrosine Phosphatase                               | 0.902                      |

| PDB ID | Residue count | EC number | SCOPE fold | Classification                          | CATH description                         | Protein Family Annotation                           | Mean persistent similary |
|--------|---------------|-----------|------------|-----------------------------------------|------------------------------------------|-----------------------------------------------------|--------------------------|
| 3R43   | 331           | 1.~..     | NA         | Oxidoreductase/Oxidoreductase Inhibitor | Nadp-Dependent Oxidoreductase            | Aldo/Keto Reductase Family                          | 0.907                    |
| 3R58   | 331           | 1.~..     | NA         | Oxidoreductase/Oxidoreductase Inhibitor | Nadp-Dependent Oxidoreductase            | Aldo/Keto Reductase Family                          | 0.911                    |
| 3R6I   | 331           | 1.~..     | NA         | Oxidoreductase/Oxidoreductase Inhibitor | Nadp-Dependent Oxidoreductase            | Aldo/Keto Reductase Family                          | 0.903                    |
| 3R7M   | 331           | 1.1.1.213 | NA         | Oxidoreductase/Oxidoreductase Inhibitor | Nadp-Dependent Oxidoreductase            | Aldo/Keto Reductase Family                          | 0.926                    |
| 3R8G   | 331           | 1.~..     | NA         | Oxidoreductase/Oxidoreductase Inhibitor | Nadp-Dependent Oxidoreductase            | Aldo/Keto Reductase Family                          | 0.931                    |
| 3RX2   | 336           | 1.1.1.21  | NA         | Oxidoreductase                          | Nadp-Dependent Oxidoreductase            | Aldo/Keto Reductase Family                          | 0.907                    |
| 3RX3   | 336           | 1.1.1.21  | NA         | Oxidoreductase                          | Nadp-Dependent Oxidoreductase            | Aldo/Keto Reductase Family                          | 0.914                    |
| 3RX4   | 336           | 1.1.1.21  | NA         | Oxidoreductase                          | Nadp-Dependent Oxidoreductase            | Aldo/Keto Reductase Family                          | 0.924                    |
| 3S3G   | 336           | 1.1.1.21  | NA         | Oxidoreductase                          | Nadp-Dependent Oxidoreductase            | Aldo/Keto Reductase Family                          | 0.914                    |
| 3T42   | 319           | 1.1.1.21  | NA         | Oxidoreductase/Oxidoreductase Inhibitor | Nadp-Dependent Oxidoreductase            | Aldo/Keto Reductase Family                          | 0.905                    |
| 3U2C   | 316           | 1.1.1.21  | NA         | Oxidoreductase/Oxidoreductase Inhibitor | Nadp-Dependent Oxidoreductase            | Aldo/Keto Reductase Family                          | 0.910                    |
| 3UFY   | 331           | 1.1.1.213 | NA         | Oxidoreductase                          | Nadp-Dependent Oxidoreductase            | Aldo/Keto Reductase Family                          | 0.924                    |
| 3UG8   | 331           | 1.1.1.213 | NA         | Oxidoreductase                          | Nadp-Dependent Oxidoreductase            | Aldo/Keto Reductase Family                          | 0.913                    |
| 3UGR   | 331           | 1.1.1.213 | NA         | Oxidoreductase                          | Nadp-Dependent Oxidoreductase            | Aldo/Keto Reductase Family                          | 0.922                    |
| 3UWE   | 331           | 1.1.1.213 | NA         | Oxidoreductase                          | Nadp-Dependent Oxidoreductase            | Aldo/Keto Reductase Family                          | 0.901                    |
| 3V35   | 336           | 1.1.1.21  | NA         | Oxidoreductase                          | Nadp-Dependent Oxidoreductase            | Aldo/Keto Reductase Family                          | 0.917                    |
| 3V36   | 336           | 1.1.1.21  | NA         | Oxidoreductase                          | Nadp-Dependent Oxidoreductase            | Aldo/Keto Reductase Family                          | 0.902                    |
| 3VXF   | 315           | 3.4.21.5  | NA         | Hydrolase/Hydrolase Inhibitor           | NA                                       | Trypsin                                             | 0.907                    |
| 4ANP   | 324           | 1.14.16.1 | NA         | Oxidoreductase                          | Phenylalanine Hydroxylase                | Biopterin-Dependent Aromatic Amino Acid Hydroxylase | 0.901                    |
| 4AX9   | 296           | 3.4.21.5  | NA         | Hydrolase/Hydrolase Inhibitor           | Trypsin-Like Serine Proteases            | Trypsin                                             | 0.901                    |
| 4D0R   | 269           | 1.3.1.9   | NA         | Oxidoreductase                          | NA                                       | Enoyl-(Acyl Carrier Protein) Reductase              | 0.906                    |
| 4DZ5   | 331           | 1.~..     | NA         | Oxidoreductase                          | Nadp-Dependent Oxidoreductase            | Aldo/Keto Reductase Family                          | 0.908                    |
| 4E05   | 356           | 3.4.21.5  | NA         | Hydrolase/Hydrolase Inhibitor           | Trypsin-Like Serine Proteases            | Trypsin                                             | 0.916                    |
| 4E97   | 374           | 3.2.1.17  | NA         | Hydrolase                               | NA                                       | Phage Lysozyme                                      | 0.901                    |
| 4EKP   | 374           | 3.2.1.17  | NA         | Hydrolase                               | NA                                       | Phage Lysozyme                                      | 0.901                    |
| 4FA3   | 331           | 1.~..     | NA         | Oxidoreductase/Oxidoreductase Inhibitor | Nadp-Dependent Oxidoreductase            | Aldo/Keto Reductase Family                          | 0.925                    |
| 4FAL   | 331           | 1.1.1.213 | NA         | Oxidoreductase/Oxidoreductase Inhibitor | Nadp-Dependent Oxidoreductase            | Aldo/Keto Reductase Family                          | 0.907                    |
| 4FV0   | 360           | 2.7.11.24 | NA         | Transferase                             | Phosphorylase Kinase; Domain 1           | Protein Kinase Domain                               | 0.908                    |
| 4FV9   | 360           | 2.7.11.24 | NA         | Transferase                             | Phosphorylase Kinase; Domain 1           | Protein Kinase Domain                               | 0.908                    |
| 4G6N   | 360           | 2.7.11.24 | NA         | Transferase                             | Transferase(Phosphotransferase) Domain 1 | Protein Kinase Domain                               | 0.902                    |
| 4GCA   | 315           | 1.1.1.21  | NA         | Oxidoreductase/Oxidoreductase Inhibitor | NA                                       | Aldo/Keto Reductase Family                          | 0.906                    |
| 4H7C   | 331           | 1.~..     | NA         | Oxidoreductase/Oxidoreductase Inhibitor | Nadp-Dependent Oxidoreductase            | Aldo/Keto Reductase Family                          | 0.908                    |
| 4I7J   | 374           | 3.2.1.17  | NA         | Hydrolase                               | NA                                       | Phage Lysozyme                                      | 0.902                    |
| 4I7L   | 374           | 3.2.1.17  | NA         | Hydrolase                               | NA                                       | Phage Lysozyme                                      | 0.903                    |
| 4I7O   | 374           | 3.2.1.17  | NA         | Hydrolase                               | NA                                       | Phage Lysozyme                                      | 0.901                    |
| 4I7R   | 374           | 3.2.1.17  | NA         | Hydrolase                               | NA                                       | Phage Lysozyme                                      | 0.903                    |
| 4I7S   | 374           | 3.2.1.17  | NA         | Hydrolase                               | NA                                       | Phage Lysozyme                                      | 0.903                    |
| 4IGS   | 316           | 1.1.1.21  | NA         | Oxidoreductase/Oxidoreductase Inhibitor | NA                                       | Aldo/Keto Reductase Family                          | 0.913                    |
| 4JH    | 318           | 1.1.1.-   | NA         | Oxidoreductase/Oxidoreductase Inhibitor | NA                                       | Aldo/Keto Reductase Family                          | 0.927                    |
| 4JHR   | 316           | 1.1.1.21  | NA         | Oxidoreductase/Oxidoreductase Inhibitor | NA                                       | Aldo/Keto Reductase Family                          | 0.928                    |
| 4LAU   | 316           | 1.1.1.21  | NA         | Oxidoreductase                          | NA                                       | Aldo/Keto Reductase Family                          | 0.905                    |
| 4LAZ   | 316           | 1.1.1.21  | NA         | Oxidoreductase                          | NA                                       | Aldo/Keto Reductase Family                          | 0.904                    |
| 4LB3   | 316           | 1.1.1.21  | NA         | Oxidoreductase                          | NA                                       | Aldo/Keto Reductase Family                          | 0.905                    |
| 4LB4   | 316           | 1.1.1.21  | NA         | Oxidoreductase                          | NA                                       | Aldo/Keto Reductase Family                          | 0.904                    |
| 4LBR   | 316           | 1.1.1.21  | NA         | Oxidoreductase                          | NA                                       | Aldo/Keto Reductase Family                          | 0.901                    |
| 4LBS   | 316           | 1.1.1.21  | NA         | Oxidoreductase                          | NA                                       | Aldo/Keto Reductase Family                          | 0.902                    |
| 4NKC   | 315           | 1.1.1.21  | NA         | Oxidoreductase/Oxidoreductase Inhibitor | NA                                       | Aldo/Keto Reductase Family                          | 0.915                    |
| 4O6E   | 368           | 2.7.11.24 | NA         | Transferase/Transferase Inhibitor       | NA                                       | Protein Kinase Domain                               | 0.903                    |
| 4PR4   | 315           | 1.1.1.21  | NA         | Oxidoreductase/Oxidoreductase Inhibitor | NA                                       | Aldo/Keto Reductase Family                          | 0.917                    |
| 4PRR   | 315           | 1.1.1.21  | NA         | Oxidoreductase/Oxidoreductase Inhibitor | NA                                       | Aldo/Keto Reductase Family                          | 0.920                    |
| 4PRT   | 316           | 1.1.1.21  | NA         | Oxidoreductase/Oxidoreductase Inhibitor | NA                                       | Aldo/Keto Reductase Family                          | 0.911                    |
| 4PUU   | 316           | 1.1.1.21  | NA         | Oxidoreductase/Oxidoreductase Inhibitor | NA                                       | Aldo/Keto Reductase Family                          | 0.911                    |
| 4PUW   | 316           | 1.1.1.21  | NA         | Oxidoreductase/Oxidoreductase Inhibitor | NA                                       | Aldo/Keto Reductase Family                          | 0.914                    |
| 4Q7B   | 315           | 1.1.1.21  | NA         | Oxidoreductase/Oxidoreductase Inhibitor | NA                                       | Aldo/Keto Reductase Family                          | 0.913                    |
| 4QAH   | 299           | 3.1.3.48  | NA         | Hydrolase                               | NA                                       | Protein-Tyrosine Phosphatase                        | 0.914                    |
| 4QAP   | 299           | 3.1.3.48  | NA         | Hydrolase                               | NA                                       | Protein-Tyrosine Phosphatase                        | 0.908                    |
| 4QBE   | 298           | 3.1.3.48  | NA         | Hydrolase                               | NA                                       | Protein-Tyrosine Phosphatase                        | 0.905                    |
| 4QBW   | 299           | 3.1.3.48  | NA         | Hydrolase                               | NA                                       | Protein-Tyrosine Phosphatase                        | 0.910                    |
| 4QBX   | 316           | 1.1.1.21  | NA         | Oxidoreductase/Oxidoreductase Inhibitor | NA                                       | Aldo/Keto Reductase Family                          | 0.912                    |
| 4QX4   | 316           | 1.1.1.21  | NA         | Oxidoreductase/Oxidoreductase Inhibitor | NA                                       | Aldo/Keto Reductase Family                          | 0.910                    |
| 4RPQ   | 315           | 1.1.1.21  | NA         | Oxidoreductase/Oxidoreductase Inhibitor | NA                                       | Aldo/Keto Reductase Family                          | 0.916                    |
| 4WRH   | 331           | 1.~..     | NA         | Oxidoreductase/Oxidoreductase Inhibitor | NA                                       | Aldo/Keto Reductase Family                          | 0.909                    |
| 4X0M   | 305           | 2.7.11.30 | NA         | Transferase                             | NA                                       | Protein Kinase Domain                               | 0.914                    |
| 4X2F   | 305           | 2.7.11.30 | NA         | Transferase/Transferase Inhibitor       | NA                                       | Protein Kinase Domain                               | 0.915                    |

| PDB ID | Residue count | EC number | SCOPE fold | Classification                    | CATH description              | Protein Family Annotation           | Mean persistent similarity |
|--------|---------------|-----------|------------|-----------------------------------|-------------------------------|-------------------------------------|----------------------------|
| 4X2G   | 305           | 2.7.11.30 | NA         | Transferase/Transferase Inhibitor | NA                            | Protein Kinase Domain               | 0.909                      |
| 4X2J   | 305           | 2.7.11.30 | NA         | Transferase                       | NA                            | Protein Kinase Domain               | 0.916                      |
| 4X2K   | 305           | 2.7.11.30 | NA         | Transferase                       | NA                            | Protein Kinase Domain               | 0.916                      |
| 4X2N   | 305           | 2.7.11.30 | NA         | Transferase                       | NA                            | Protein Kinase Domain               | 0.920                      |
| 4XZI   | 316           | 1.1.1.21  | NA         | Oxidoreductase                    | NA                            | Aldo/Keto Reductase Family          | 0.905                      |
| 4YS1   | 316           | 1.1.1.21  | NA         | Oxidoreductase                    | NA                            | Aldo/Keto Reductase Family          | 0.908                      |
| 4YU1   | 316           | 1.1.1.21  | NA         | Oxidoreductase                    | NA                            | Aldo/Keto Reductase Family          | 0.924                      |
| 4ZRT   | 309           | 3.1.3.48  | NA         | Hydrolase                         | NA                            | Protein-Tyrosine Phosphatase        | 0.906                      |
| 4ZZN   | 350           | 2.7.11.24 | NA         | Transferase                       | NA                            | Protein Kinase Domain               | 0.906                      |
| 5E8Z   | 307           | 2.7.11.30 | NA         | Transferase/Transferase Inhibitor | NA                            | Protein Kinase Domain               | 0.908                      |
| 5GDS   | 321           | 3.4.21.5  | NA         | Hydrolase/Hydrolase Inhibitor     | Trypsin-Like Serine Proteases | Trypsin                             | 0.909                      |
| 5GIM   | 325           | 3.4.21.5  | NA         | Hydrolase/Hydrolase Inhibitor     | NA                            | Thrombin Light Chain                | 0.905                      |
| 5JFD   | 307           | 3.4.21.5  | NA         | Hydrolase                         | NA                            | Trypsin                             | 0.903                      |
| 5KAA   | 289           | 3.1.3.48  | NA         | Hydrolase                         | NA                            | Protein-Tyrosine Phosphatase        | 0.909                      |
| 5LUC   | 3224          | 2.6.1.51  | NA         | Transferase                       | NA                            | Aminotransferase Class-V            | 0.918                      |
| 5NHH   | 381           | 2.7.11.24 | NA         | Transferase                       | NA                            | Protein Kinase Domain               | 0.901                      |
| 5QIM   | 306           | 2.7.11.30 | NA         | Transferase/Transferase Inhibitor | NA                            | Protein Kinase Domain               | 0.908                      |
| 5TC6   | 297           | 2.4.2.28  | NA         | Transferase/Transferase Inhibitor | NA                            | Phosphorylase Superfamily           | 0.900                      |
| 5TC8   | 297           | 2.4.2.28  | NA         | Transferase/Transferase Inhibitor | NA                            | Phosphorylase Superfamily           | 0.904                      |
| 5TE0   | 347           | 2.7.11.1  | NA         | Transferase/Transferase Inhibitor | NA                            | Protein Kinase Domain               | 0.904                      |
| 5USQ   | 299           | 2.7.11.30 | NA         | Transferase/Transferase Inhibitor | NA                            | Protein Kinase Domain               | 0.910                      |
| 5Y7N   | 316           | 1.1.1.-   | NA         | Oxidoreductase                    | NA                            | Aldo/Keto Reductase Family          | 0.912                      |
| 6B8T   | 321           | 3.1.3.48  | NA         | Signaling Protein                 | NA                            | Protein-Tyrosine Phosphatase        | 0.903                      |
| 6B8X   | 321           | 3.1.3.48  | NA         | Signaling Protein                 | NA                            | Protein-Tyrosine Phosphatase        | 0.902                      |
| 6B8Y   | 307           | 2.7.11.30 | NA         | Transferase/Transferase Inhibitor | NA                            | Protein Kinase Domain               | 0.907                      |
| 6F7R   | 316           | 1.1.1.21  | NA         | Oxidoreductase                    | NA                            | Aldo/Keto Reductase Family          | 0.900                      |
| 6F81   | 316           | 1.1.1.21  | NA         | Oxidoreductase                    | NA                            | Aldo/Keto Reductase Family          | 0.904                      |
| 6F82   | 316           | 1.1.1.21  | NA         | Oxidoreductase                    | NA                            | Aldo/Keto Reductase Family          | 0.913                      |
| 6F84   | 316           | 1.1.1.21  | NA         | Oxidoreductase                    | NA                            | Aldo/Keto Reductase Family          | 0.916                      |
| 6F8O   | 317           | 1.1.1.21  | NA         | Oxidoreductase                    | NA                            | Aldo/Keto Reductase Family          | 0.905                      |
| 6G6J   | 354           | NA        | NA         | Apoptosis                         | NA                            | Helix-Loop-Helix Dna-Binding Domain | 0.905                      |
| 6G8X   | 368           | 2.7.11.24 | NA         | Signaling Protein                 | NA                            | Protein Kinase Domain               | 0.906                      |
| 6G91   | 368           | 2.7.11.24 | NA         | Signaling Protein                 | NA                            | Protein Kinase Domain               | 0.911                      |
| 6G9A   | 368           | 2.7.11.24 | NA         | Signaling Protein                 | NA                            | Protein Kinase Domain               | 0.920                      |
| 6G9K   | 368           | 2.7.11.24 | NA         | Signaling Protein                 | NA                            | Protein Kinase Domain               | 0.901                      |
| 6G9M   | 368           | 2.7.11.24 | NA         | Signaling Protein                 | NA                            | Protein Kinase Domain               | 0.910                      |
| 6NBS   | 367           | 2.7.11.24 | NA         | Transferase/Transferase Inhibitor | NA                            | Protein Kinase Domain               | 0.908                      |
| 6OMY   | 297           | 3.1.3.48  | NA         | Hydrolase                         | NA                            | Protein-Tyrosine Phosphatase        | 0.902                      |
| 6OPG   | 354           | 2.7.11.24 | NA         | Transferase                       | NA                            | Protein Kinase Domain               | 0.906                      |
| 6OPI   | 354           | 2.7.11.24 | NA         | Transferase                       | NA                            | Protein Kinase Domain               | 0.907                      |
| 6PFW   | 297           | 3.1.3.48  | NA         | Hydrolase                         | NA                            | Protein-Tyrosine Phosphatase        | 0.909                      |
| 6PG0   | 297           | 3.1.3.48  | NA         | Hydrolase                         | NA                            | Protein-Tyrosine Phosphatase        | 0.901                      |
| 6PHA   | 297           | 3.1.3.48  | NA         | Hydrolase                         | NA                            | Protein-Tyrosine Phosphatase        | 0.904                      |
| 6PHS   | 297           | 3.1.3.48  | NA         | Hydrolase                         | NA                            | Protein-Tyrosine Phosphatase        | 0.908                      |
| 6Q7S   | 368           | 2.7.11.24 | NA         | Signaling Protein                 | NA                            | Protein Kinase Domain               | 0.905                      |
| 6Q7T   | 368           | 2.7.11.24 | NA         | Signaling Protein                 | NA                            | Protein Kinase Domain               | 0.911                      |
| 6QA1   | 368           | 2.7.11.24 | NA         | Signaling Protein                 | NA                            | Protein Kinase Domain               | 0.921                      |
| 6QA4   | 368           | 2.7.11.24 | NA         | Signaling Protein                 | NA                            | Protein Kinase Domain               | 0.909                      |
| 6QAL   | 368           | 2.7.11.24 | NA         | Signaling Protein                 | NA                            | Protein Kinase Domain               | 0.924                      |
| 6QAW   | 368           | 2.7.11.24 | NA         | Signaling Protein                 | NA                            | Protein Kinase Domain               | 0.902                      |
| 6SLG   | 386           | 2.7.11.24 | NA         | Transferase                       | NA                            | Protein Kinase Domain               | 0.904                      |

Supplementary Table 1: Proteins targeted by Drugbank FDA-approved medications showing average persistent similarity measures higher than 0.9 with 6M2Q.

| Drug name        | Drug id | PC set 1(GSE150316) | PC set 2 (CRA002390) | PC set 3 (GSE147507) | autodock LE (kcal/mol) | autodock cluster |
|------------------|---------|---------------------|----------------------|----------------------|------------------------|------------------|
| Cholic Acid      | DB02659 | -0.08805090329      | -0.1122360022        | -0.08069352402       | -15.06                 | 74               |
| Rutin            | DB01698 | -0.07057525739      | -0.1847669519        | -0.1024903315        | -14.52                 | 149              |
| Deoxycholic acid | DB03619 | -0.08557550853      | -0.07828704382       | -0.06475834161       | -13.95                 | 50               |
| Vorapaxar        | DB09030 | NA                  | NA                   | NA                   | -13.57                 | 38               |
| Indomethacin     | DB00328 | -0.06872835755      | -0.1234924169        | -0.05359016853       | -13.31                 | 146              |
| Sulindac         | DB00605 | -0.06768358761      | -0.1193287796        | -0.06631246593       | -13.14                 | 73               |
| NADH             | DB00157 | NA                  | NA                   | NA                   | -13.11                 | 19               |
| Argatroban       | DB00278 | NA                  | NA                   | NA                   | -12.2                  | 14               |
| Sulfaphenazole   | DB06729 | -0.03586963775      | -0.09303735598       | -0.05246772731       | -11.88                 | 77               |
| Sulfisoxazole    | DB00263 | -0.05362836277      | -0.1325276338        | -0.08602283924       | -11.59                 | 76               |
| Dequalinium      | DB04209 | -0.07308190955      | -0.02608396353       | -0.02037787892       | -11.35                 | 15               |
| Pretomanid       | DB05154 | -0.01941042793      | -0.02603060121       | -0.02876344372       | -11.07                 | 60               |
| Sulfacytine      | DB01298 | NA                  | NA                   | NA                   | -11.03                 | 80               |
| Dasatinib        | DB01254 | -0.03959075682      | -0.1464677954        | -0.09185735897       | -10.94                 | 43               |
| Fostamatinib     | DB12010 | NA                  | NA                   | NA                   | -10.74                 | 11               |
| Triclosan        | DB08604 | -0.1338300494       | -0.0825734045        | -0.03948117551       | -10.71                 | 69               |
| Thalidomide      | DB01041 | -0.08657364237      | -0.1593972746        | -0.08730739799       | -10.7                  | 11               |
| Sulfamethizole   | DB00576 | -0.02669528015      | -0.009223741736      | 5.7299665057815e-05  | -10.56                 | 53               |

| Drug name            | Drug id | PC set 1 (GSE150316) | PC set 2 (CRA002390) | PC set 3 (GSE147507) | autodock LE (kcal/mol) | autodock cluster |
|----------------------|---------|----------------------|----------------------|----------------------|------------------------|------------------|
| Lactose              | DB04465 | NA                   | NA                   | NA                   | -10.43                 | 30               |
| Sulfamethoxazole     | DB01015 | -0.01913885916       | -0.003014737224      | -0.004657065098      | -10.39                 | 50               |
| Sulfamethazine       | DB01582 | -0.02788408235       | -0.02028104527       | -0.007299216869      | -10.37                 | 63               |
| Sulfamerazine        | DB01581 | -0.03492115083       | -0.01994952868       | -0.05072835775       | -9.97                  | 44               |
| Sulfameter           | DB06821 | NA                   | NA                   | NA                   | -9.94                  | 62               |
| Menadione            | DB00170 | -0.1453822115        | -0.1355622276        | -0.07575705865       | -9.31                  | 150              |
| Timolol              | DB00373 | -0.06960236247       | -0.1682405832        | -0.08729867794       | -9.18                  | 12               |
| Glutathione          | DB00143 | NA                   | NA                   | NA                   | -9.14                  | 16               |
| Sulfacetamide        | DB00634 | -0.04831995979       | -0.1149364926        | -0.08114789578       | -9.13                  | 94               |
| Proflavine           | DB01123 | NA                   | NA                   | NA                   | -9.09                  | 30               |
| Cladribine           | DB00242 | -0.1176725341        | -0.1384668748        | -0.0553976742        | -8.98                  | 65               |
| Flufenamic acid      | DB02266 | -0.03794344247       | -0.1482318394        | -0.0330936669        | -8.92                  | 35               |
| Isoprenaline         | DB01064 | NA                   | NA                   | NA                   | -8.73                  | 44               |
| Didanosine           | DB00900 | -0.0523769169        | -0.07471125925       | -0.0586221941        | -8.57                  | 69               |
| Pyridoxal phosphate  | DB00114 | NA                   | NA                   | NA                   | -8.4                   | 58               |
| Droxidopa            | DB06262 | NA                   | NA                   | NA                   | -8.4                   | 55               |
| Sapropterin          | DB00360 | NA                   | NA                   | NA                   | -8.25                  | 66               |
| Dabigatran etexilate | DB06695 | NA                   | NA                   | NA                   | -8.16                  | 4                |
| Triflusal            | DB08814 | -0.05294840337       | -0.1230937216        | -0.07077350638       | -7.57                  | 39               |
| Sulfanilamide        | DB00259 | NA                   | NA                   | NA                   | -7.52                  | 128              |
| Norepinephrine       | DB00368 | NA                   | NA                   | NA                   | -7.46                  | 46               |
| Pseudoephedrine      | DB00852 | NA                   | NA                   | NA                   | -7.3                   | 42               |
| Phenylalanine        | DB00120 | NA                   | NA                   | NA                   | -7.24                  | 47               |
| Acetylsalicylic acid | DB00945 | -0.03307493015       | -0.1012026588        | -0.07444387473       | -7.03                  | 36               |



| Drug name             | Drug id | PC set 1(GSE150316) | PC set 2 (CRA002390) | PC set 3 (GSE147507) | autodock LE (kcal/mol) | autodock cluster |
|-----------------------|---------|---------------------|----------------------|----------------------|------------------------|------------------|
| <b>Ximelagatran</b>   | DB04898 | NA                  | NA                   | NA                   | -7                     | 16               |
| <b>Ethionamide</b>    | DB00609 | -0.006951782285     | -0.07256201732       | -0.04149610657       | -6.96                  | 54               |
| <b>Salicylic acid</b> | DB00936 | NA                  | NA                   | NA                   | -6.34                  | 59               |
| <b>Adenine</b>        | DB00173 | NA                  | NA                   | NA                   | -6.29                  | 49               |
| <b>Isoniazid</b>      | DB00951 | -0.02183996932      | -0.06238072939       | -0.05362049256       | -6.07                  | 69               |
| <b>Citric acid</b>    | DB04272 | NA                  | NA                   | NA                   | -5.83                  | 28               |
| <b>Phenol</b>         | DB03255 | NA                  | NA                   | NA                   | -5.48                  | 150              |
| <b>Taurine</b>        | DB01956 | NA                  | NA                   | NA                   | -4.92                  | 81               |
| <b>Guanidine</b>      | DB00536 | NA                  | NA                   | NA                   | -3.44                  | 28               |
| <b>Glycine</b>        | DB00145 | NA                  | NA                   | NA                   | -3.32                  | 91               |
| <b>Sucralfate</b>     | DB00364 | NA                  | NA                   | NA                   | 15.17                  | 75               |
| <b>Bivalirudin</b>    | DB00006 | NA                  | NA                   | NA                   | 4030                   | 1                |

Supplementary Table 2: Transcriptomic and molecular docking analyses results for drugs with the potential of targeting the SARS-CoV-2 3CL protease in apo conformation (6M2Q)

| PDB ID | Residue count | EC number | SCOPE fold                                                               | Classification                       | CATH description                                  | Protein Family Annotation                            | Mean persistent similarity |
|--------|---------------|-----------|--------------------------------------------------------------------------|--------------------------------------|---------------------------------------------------|------------------------------------------------------|----------------------------|
| 1d4L   | 332           | NA        | Lysosyme-Like                                                            | Hydrolase(O-Glycosyl)                | NA                                                | Phage Lysosyme                                       | 0.906                      |
| 1A5Y   | 330           | 3.1.3.48  | (Phosphotyrosine Protein) Phosphatases II                                | Hydrolase                            | Protein Tyrosine Phosphatase Superfamily          | Protein-Tyrosine Phosphatase                         | 0.909                      |
| 1AAX   | 321           | 3.1.3.48  | (Phosphotyrosine Protein) Phosphatases II                                | Hydrolase                            | Protein Tyrosine Phosphatase Superfamily          | Protein-Tyrosine Phosphatase                         | 0.907                      |
| 1AB1   | 315           | 3.4.21.5  | NA                                                                       | Hydrolase/Hydrolase Inhibitor        | Trypsin-Like Serine Proteases                     | Trypsin                                              | 0.908                      |
| 1ADS   | 315           | 1.1.1.21  | Tim Beta/Alpha-Barrel                                                    | Oxidoreductase                       | Nadp-Dependent Oxidoreductase                     | Aldo/Keto Reductase Family                           | 0.902                      |
| 1AEB   | 305           | 3.4.21.5  | NA                                                                       | Hydrolase/Hydrolase Inhibitor        | Trypsin-Like Serine Proteases                     | Trypsin                                              | 0.905                      |
| 1AFE   | 305           | 3.4.21.5  | NA                                                                       | Hydrolase/Hydrolase Inhibitor        | Trypsin-Like Serine Proteases                     | Trypsin                                              | 0.912                      |
| 1AB8   | 307           | 3.4.21.5  | NA                                                                       | Blood Clotting/Hydrolase Inhibitor   | Trypsin-Like Serine Proteases                     | Trypsin                                              | 0.902                      |
| 1AB0   | 282           | 2.5.1.15  | Tim Beta/Alpha-Barrel                                                    | Synthase                             | Dihydrogermate (Dhp) Synthase                     | Protein Binding Enzyme                               | 0.900                      |
| 1AY6   | 308           | 3.4.21.5  | NA                                                                       | Hydrolase/Hydrolase Inhibitor        | Trypsin-Like Serine Proteases                     | Trypsin                                              | 0.903                      |
| 1AZ2   | 315           | 1.1.1.21  | Tim Beta/Alpha-Barrel                                                    | Oxidoreductase                       | Nadp-Dependent Oxidoreductase                     | Aldo/Keto Reductase Family                           | 0.915                      |
| 1CIW   | 306           | 3.4.21.5  | NA                                                                       | Hydrolase/Hydrolase Inhibitor        | Trypsin-Like Serine Proteases                     | Trypsin                                              | 0.900                      |
| 1C4Y   | 308           | 3.4.21.5  | Trypsin-Like Serine Proteases                                            | Hydrolase/Hydrolase Inhibitor        | NA                                                | Thrombin Light Chain                                 | 0.900                      |
| 1C5L   | 305           | 3.4.21.5  | NA                                                                       | Blood Clotting/Hydrolase Inhibitor   | Trypsin-Like Serine Proteases                     | Trypsin                                              | 0.903                      |
| 1CSN   | 305           | 3.4.21.5  | NA                                                                       | Hydrolase/Hydrolase Inhibitor        | Trypsin-Like Serine Proteases                     | Trypsin                                              | 0.907                      |
| 1DXT   | 307           | 3.4.21.5  | Trypsin-Like Serine Proteases                                            | Hydrolase/Hydrolase Inhibitor        | NA                                                | Thrombin Light Chain                                 | 0.902                      |
| 1DM4   | 306           | NA        | Trypsin-Like Serine Proteases                                            | Hydrolase                            | NA                                                | Thrombin Light Chain                                 | 0.905                      |
| 1DWC   | 306           | 3.4.21.5  | NA                                                                       | Hydrolase/Hydrolase Inhibitor        | Trypsin-Like Serine Proteases                     | Trypsin                                              | 0.901                      |
| 1E25   | 282           | 3.5.2.6   | Beta-Lactamase/Transpeptidase-Like                                       | Hydrolase                            | Di-Peptidase/Beta-Lactamase Superfamily           | Beta-Lactamase Enzyme Family                         | 0.912                      |
| 1EB1   | 297           | NA        | NA                                                                       | Hydrolase/Hydrolase Inhibitor        | NA                                                | NA                                                   | 0.904                      |
| 1EEO   | 332           | 3.1.3.48  | (Phosphotyrosine Protein) Phosphatases II                                | Hydrolase/Hydrolase Substrate        | Protein Tyrosine Phosphatase Superfamily          | Protein-Tyrosine Phosphatase                         | 0.913                      |
| 1EL3   | 316           | 1.1.1.21  | Tim Beta/Alpha-Barrel                                                    | Oxidoreductase                       | Nadp-Dependent Oxidoreductase                     | Aldo/Keto Reductase Family                           | 0.924                      |
| 1ENY   | 268           | NA        | Nad(P)-Binding Rossmann-Fold Domains                                     | Oxidoreductase                       | Nad(P)-Binding Rossmann-Like Domain               | Enoyl-(Acyl Carrier Protein) Reductase               | 0.906                      |
| 1G30   | 306           | 3.4.21.5  | Trypsin-Like Serine Proteases                                            | Hydrolase/Hydrolase Inhibitor        | NA                                                | Thrombin Light Chain                                 | 0.909                      |
| 1G32   | 306           | 3.4.21.5  | Trypsin-Like Serine Proteases                                            | Hydrolase/Hydrolase Inhibitor        | NA                                                | Thrombin Light Chain                                 | 0.906                      |
| 1GHV   | 304           | 3.4.21.5  | NA                                                                       | Hydrolase/Hydrolase Inhibitor        | Trypsin-Like Serine Proteases                     | Trypsin                                              | 0.910                      |
| 1GJ5   | 305           | 3.4.21.5  | NA                                                                       | Blood Clotting/Hydrolase/Inhibitor   | Trypsin-Like Serine Proteases                     | Trypsin                                              | 0.901                      |
| 1H81   | 290           | 3.4.21.5  | NA                                                                       | Hydrolase/Hydrolase Inhibitor        | Trypsin-Like Serine Proteases                     | Trypsin                                              | 0.903                      |
| 1IAH   | 305           | 3.4.21.5  | NA                                                                       | Complex(Serine Proteinase/Inhibitor) | Trypsin-Like Serine Proteases                     | Trypsin                                              | 0.912                      |
| 1IAI   | 295           | 3.4.21.5  | NA                                                                       | Hydrolase/Hydrolase Inhibitor        | Trypsin-Like Serine Proteases                     | Trypsin                                              | 0.904                      |
| 1HDT   | 304           | 3.4.21.5  | NA                                                                       | Hydrolase/Hydrolase Inhibitor        | Trypsin-Like Serine Proteases                     | Trypsin                                              | 0.910                      |
| 1IHS   | 316           | 3.4.21.5  | NA                                                                       | Hydrolase/Hydrolase Inhibitor        | Trypsin-Like Serine Proteases                     | Trypsin                                              | 0.912                      |
| 1JW1   | 305           | 3.4.21.5  | Trypsin-Like Serine Proteases                                            | Hydrolase                            | Trypsin-Like Serine Proteases                     | Thrombin Light Chain                                 | 0.904                      |
| 1KAV   | 298           | 3.1.3.48  | (Phosphotyrosine Protein) Phosphatases II                                | Hydrolase                            | Protein Tyrosine Phosphatase Superfamily          | Protein-Tyrosine Phosphatase                         | 0.903                      |
| 1KW0   | 325           | 1.14.16.1 | Aromatic Aminoacid Monooxygenases, Catalytic And Oligomerization Domains | Oxidoreductase                       | Phenylalanine Hydroxylase                         | Bioprotein-Dependent Aromatic Amino Acid Hydroxylase | 0.907                      |
| 1MAR   | 315           | 1.1.1.21  | Tim Beta/Alpha-Barrel                                                    | Oxidoreductase(Nadp)                 | NA                                                | Aldo/Keto Reductase Family                           | 0.921                      |
| 1MMK   | 325           | 1.14.16.1 | Aromatic Aminoacid Monooxygenases, Catalytic And Oligomerization Domains | Oxidoreductase                       | Phenylalanine Hydroxylase                         | Bioprotein-Dependent Aromatic Amino Acid Hydroxylase | 0.921                      |
| 1MMT   | 325           | 1.14.16.1 | Aromatic Aminoacid Monooxygenases, Catalytic And Oligomerization Domains | Oxidoreductase                       | Phenylalanine Hydroxylase                         | Bioprotein-Dependent Aromatic Amino Acid Hydroxylase | 0.906                      |
| 1MRQ   | 323           | 1.1.1.149 | Tim Beta/Alpha-Barrel                                                    | Oxidoreductase                       | Nadp-Dependent Oxidoreductase                     | Aldo/Keto Reductase Family                           | 0.904                      |
| 1MUE   | 306           | 3.4.21.5  | Trypsin-Like Serine Proteases                                            | Hydrolase Inhibitor                  | NA                                                | Thrombin Light Chain                                 | 0.905                      |
| 1N09   | 306           | 3.4.21.5  | NA                                                                       | Hydrolase/Hydrolase Inhibitor        | Trypsin-Like Serine Proteases                     | Trypsin                                              | 0.901                      |
| 1NRN   | 318           | 3.4.21.5  | NA                                                                       | Serine Proteinase/Receptor           | Trypsin-Like Serine Proteases                     | Trypsin                                              | 0.907                      |
| 1NRS   | 311           | 3.4.21.5  | NA                                                                       | Hydrolase/Hydrolase Inhibitor        | Trypsin-Like Serine Proteases                     | Trypsin                                              | 0.905                      |
| 1NW9   | 375           | NA        | Inhibitor Of Apoptosis (Iap) Repeat                                      | Apoptosis                            | Inhibitor Of Apoptosis Protein (ZnBcl-1); Chain A | Inhibitor Of Apoptosis Domain                        | 0.901                      |
| 1OES   | 321           | 3.1.3.48  | (Phosphotyrosine Protein) Phosphatases II                                | Hydrolase                            | Protein Tyrosine Phosphatase Superfamily          | Protein-Tyrosine Phosphatase                         | 0.902                      |
| 1OEV   | 321           | 3.1.3.48  | (Phosphotyrosine Protein) Phosphatases II                                | Hydrolase                            | Protein Tyrosine Phosphatase Superfamily          | Protein-Tyrosine Phosphatase                         | 0.901                      |
| 1ONY   | 321           | 3.1.3.48  | (Phosphotyrosine Protein) Phosphatases II                                | Hydrolase                            | Protein Tyrosine Phosphatase Superfamily          | Protein-Tyrosine Phosphatase                         | 0.915                      |
| 1PF7   | 289           | 2.4.2.1   | Phosphorylase/Hydrolase-Like                                             | Transferase                          | NA                                                | Phosphorylase Superfamily                            | 0.912                      |
| 1PME   | 380           | 2.7.1.-   | Protein Kinase-Like (Pk-Like)                                            | Transferase                          | Phosphorylase Kinase; Domain 1                    | Protein Kinase Domain                                | 0.916                      |
| 1PMU   | 364           | 2.7.1.-   | Protein Kinase-Like (Pk-Like)                                            | Transferase                          | Phosphorylase Kinase; Domain 1                    | Protein Kinase Domain                                | 0.911                      |
| 1PTT   | 326           | 3.1.3.48  | (Phosphotyrosine Protein) Phosphatases II                                | Complex (Hydrolase/Peptide)          | Protein Tyrosine Phosphatase Superfamily          | Protein-Tyrosine Phosphatase                         | 0.911                      |
| 1PTV   | 321           | 3.1.3.48  | (Phosphotyrosine Protein) Phosphatases II                                | Complex (Hydrolase/Peptide)          | Protein Tyrosine Phosphatase Superfamily          | Protein-Tyrosine Phosphatase                         | 0.905                      |
| 1PTY   | 321           | 3.1.3.48  | (Phosphotyrosine Protein) Phosphatases II                                | Hydrolase                            | Protein Tyrosine Phosphatase Superfamily          | Protein-Tyrosine Phosphatase                         | 0.902                      |
| 1PWL   | 316           | 1.1.1.21  | Tim Beta/Alpha-Barrel                                                    | Oxidoreductase                       | Nadp-Dependent Oxidoreductase                     | Aldo/Keto Reductase Family                           | 0.910                      |
| 1PWM   | 316           | 1.1.1.21  | Tim Beta/Alpha-Barrel                                                    | Oxidoreductase                       | Nadp-Dependent Oxidoreductase                     | Aldo/Keto Reductase Family                           | 0.920                      |
| 1PWY   | 288           | 2.4.2.1   | Phosphorylase/Hydrolase-Like                                             | Transferase                          | NA                                                | Phosphorylase Superfamily                            | 0.902                      |
| 1QBV   | 306           | NA        | NA                                                                       | Hydrolase/Hydrolase Inhibitor        | NA                                                | NA                                                   | 0.900                      |
| 1QBB   | 305           | 3.4.21.5  | Trypsin-Like Serine Proteases                                            | Blood Clotting/Hydrolase Inhibitor   | NA                                                | Thrombin Light Chain                                 | 0.900                      |
| 1QUR   | 303           | NA        | NA                                                                       | Hydrolase/Hydrolase Inhibitor        | Trypsin-Like Serine Proteases                     | Trypsin                                              | 0.906                      |
| 1RCT   | 288           | 2.4.2.1   | Phosphorylase/Hydrolase-Like                                             | Transferase                          | NA                                                | Phosphorylase Superfamily                            | 0.903                      |
| 1RWS   | 301           | 2.7.1.37  | NA                                                                       | Transferase                          | Transferase(Phosphotransferase) Domain 1          | Protein Kinase Domain                                | 0.913                      |
| 1S2A   | 331           | 1.1.1.213 | Tim Beta/Alpha-Barrel                                                    | Oxidoreductase                       | Nadp-Dependent Oxidoreductase                     | Aldo/Keto Reductase Family                           | 0.905                      |
| 1S2C   | 331           | 1.1.1.213 | Tim Beta/Alpha-Barrel                                                    | Oxidoreductase                       | Nadp-Dependent Oxidoreductase                     | Aldo/Keto Reductase Family                           | 0.904                      |
| 1SVC   | 384           | NA        | NA                                                                       | Transcription/Dna                    | NA                                                | NA                                                   | 0.906                      |
| 1T40   | 316           | 1.1.1.21  | Tim Beta/Alpha-Barrel                                                    | Oxidoreductase                       | Nadp-Dependent Oxidoreductase                     | Aldo/Keto Reductase Family                           | 0.916                      |
| 1T46   | 298           | 3.1.3.48  | (Phosphotyrosine Protein) Phosphatases II                                | Hydrolase                            | Protein Tyrosine Phosphatase Superfamily          | Protein-Tyrosine Phosphatase                         | 0.906                      |
| 1THH   | 308           | 3.4.21.5  | NA                                                                       | Hydrolase(Serine Proteinase)         | Trypsin-Like Serine Proteases                     | Trypsin                                              | 0.903                      |
| 1TMB   | 313           | 3.4.21.5  | NA                                                                       | Hydrolase/Hydrolase Inhibitor        | Trypsin-Like Serine Proteases                     | Trypsin                                              | 0.905                      |
| 1TMT   | 316           | 3.4.21.5  | NA                                                                       | Hydrolase/Hydrolase Inhibitor        | Trypsin-Like Serine Proteases                     | Trypsin                                              | 0.909                      |
| 1UMA   | 305           | 3.4.21.5  | NA                                                                       | Hydrolase/Hydrolase Inhibitor        | Trypsin-Like Serine Proteases                     | Trypsin                                              | 0.914                      |
| 1V41   | 288           | 2.4.2.1   | Phosphorylase/Hydrolase-Like                                             | Transferase                          | NA                                                | Phosphorylase Superfamily                            | 0.921                      |
| 1VJY   | 303           | 2.7.1.37  | Protein Kinase-Like (Pk-Like)                                            | Transferase                          | Phosphorylase Kinase; Domain 1                    | Protein Kinase Domain                                | 0.931                      |
| 1WAY   | 305           | 3.4.21.5  | NA                                                                       | Hydrolase/Hydrolase Inhibitor        | NA                                                | Thrombin Light Chain                                 | 0.903                      |
| 1WBG   | 305           | 3.4.21.5  | NA                                                                       | Hydrolase/Hydrolase Inhibitor        | NA                                                | Thrombin Light Chain                                 | 0.905                      |
| 1X06   | 316           | 1.1.1.21  | Tim Beta/Alpha-Barrel                                                    | Oxidoreductase                       | Nadp-Dependent Oxidoreductase                     | Aldo/Keto Reductase Family                           | 0.921                      |
| 1X97   | 316           | 1.1.1.21  | Tim Beta/Alpha-Barrel                                                    | Oxidoreductase                       | Nadp-Dependent Oxidoreductase                     | Aldo/Keto Reductase Family                           | 0.916                      |
| 1X98   | 316           | 1.1.1.21  | Tim Beta/Alpha-Barrel                                                    | Oxidoreductase                       | Nadp-Dependent Oxidoreductase                     | Aldo/Keto Reductase Family                           | 0.912                      |
| 1XAS   | 299           | 3.2.1.8   | Tim Beta/Alpha-Barrel                                                    | Xylanase A                           | NA                                                | Glycosyl Hydrolase Family 10                         | 0.921                      |
| 1XMI   | 305           | 3.4.21.5  | Trypsin-Like Serine Proteases                                            | Hydrolase/Hydrolase Inhibitor        | Trypsin-Like Serine Proteases                     | Trypsin                                              | 0.900                      |
| 1YRY   | 289           | 2.4.2.1   | Phosphorylase/Hydrolase-Like                                             | Transferase                          | NA                                                | Phosphorylase Superfamily                            | 0.902                      |
| 1Z4N   | 319           | 1.1.1.21  | Tim Beta/Alpha-Barrel                                                    | Oxidoreductase                       | Nadp-Dependent Oxidoreductase                     | Aldo/Keto Reductase Family                           | 0.930                      |
| 1Z89   | 316           | 1.1.1.21  | Tim Beta/Alpha-Barrel                                                    | Oxidoreductase                       | Nadp-Dependent Oxidoreductase                     | Aldo/Keto Reductase Family                           | 0.921                      |
| 1Z8A   | 316           | 1.1.1.21  | Tim Beta/Alpha-Barrel                                                    | Oxidoreductase                       | Nadp-Dependent Oxidoreductase                     | Aldo/Keto Reductase Family                           | 0.905                      |
| 1ZUA   | 317           | 1.1.1.-   | NA                                                                       | Oxidoreductase                       | Nadp-Dependent Oxidoreductase                     | Aldo/Keto Reductase Family                           | 0.913                      |

| PDB ID | Residue count | EC number | SCOPE fold                                | Classification                          | CATH description                         | Protein Family Annotation                                  | Mean persistent similarity |
|--------|---------------|-----------|-------------------------------------------|-----------------------------------------|------------------------------------------|------------------------------------------------------------|----------------------------|
| 2ACQ   | 315           | 1.1.1.21  | Tim Beta/Alpha-Barrel                     | Oxidoreductase                          | Nadp-Dependent Oxidoreductase            | Aldo/Keto Reductase Family                                 | 0.905                      |
| 2ACR   | 315           | 1.1.1.21  | Tim Beta/Alpha-Barrel                     | Oxidoreductase                          | Nadp-Dependent Oxidoreductase            | Aldo/Keto Reductase Family                                 | 0.902                      |
| 2ACU   | 315           | 1.1.1.21  | Tim Beta/Alpha-Barrel                     | Oxidoreductase                          | Nadp-Dependent Oxidoreductase            | Aldo/Keto Reductase Family                                 | 0.921                      |
| 2AGT   | 319           | 1.1.1.21  | NA                                        | Oxidoreductase                          | Nadp-Dependent Oxidoreductase            | Aldo/Keto Reductase Family                                 | 0.915                      |
| 2HGD   | 321           | 3.1.3.48  | (Phosphotyrosine Protein) Phosphatases II | Hydrolase                               | Protein Tyrosine Phosphatase Superfamily | Protein-Tyrosine Phosphatase                               | 0.900                      |
| 2BGE   | 321           | 3.1.3.48  | (Phosphotyrosine Protein) Phosphatases II | Hydrolase                               | Protein Tyrosine Phosphatase Superfamily | Protein-Tyrosine Phosphatase                               | 0.912                      |
| 2C93   | 307           | 3.4.21.5  | NA                                        | Hydrolase/Hydrolase Inhibitor           | NA                                       | Thrombin Light Chain                                       | 0.903                      |
| 2CMA   | 327           | 3.1.3.48  | (Phosphotyrosine Protein) Phosphatases II | Hydrolase                               | Protein Tyrosine Phosphatase Superfamily | Protein-Tyrosine Phosphatase                               | 0.905                      |
| 2DUZ   | 316           | 1.1.1.21  | Tim Beta/Alpha-Barrel                     | Oxidoreductase                          | Nadp-Dependent Oxidoreductase            | Aldo/Keto Reductase Family                                 | 0.902                      |
| 2DV0   | 316           | 1.1.1.21  | Tim Beta/Alpha-Barrel                     | Oxidoreductase                          | Nadp-Dependent Oxidoreductase            | Aldo/Keto Reductase Family                                 | 0.910                      |
| 2F2K   | 316           | 1.1.1.21  | Tim Beta/Alpha-Barrel                     | Oxidoreductase                          | Nadp-Dependent Oxidoreductase            | Aldo/Keto Reductase Family                                 | 0.911                      |
| 2F6F   | 302           | 3.1.3.48  | NA                                        | Hydrolase                               | Protein Tyrosine Phosphatase Superfamily | Protein-Tyrosine Phosphatase                               | 0.902                      |
| 2FGB   | 323           | 1.1.1.62  | Tim Beta/Alpha-Barrel                     | Oxidoreductase                          | Nadp-Dependent Oxidoreductase            | Aldo/Keto Reductase Family                                 | 0.906                      |
| 2FZ8   | 316           | 1.1.1.21  | Tim Beta/Alpha-Barrel                     | Oxidoreductase                          | Nadp-Dependent Oxidoreductase            | Aldo/Keto Reductase Family                                 | 0.906                      |
| 2FZ9   | 316           | 1.1.1.21  | Tim Beta/Alpha-Barrel                     | Oxidoreductase                          | Nadp-Dependent Oxidoreductase            | Aldo/Keto Reductase Family                                 | 0.915                      |
| 2FZB   | 316           | 1.1.1.21  | Tim Beta/Alpha-Barrel                     | Oxidoreductase                          | Nadp-Dependent Oxidoreductase            | Aldo/Keto Reductase Family                                 | 0.920                      |
| 2G3J   | 313           | 3.2.1.8   | NA                                        | Hydrolase                               | Glycosidase                              | Glycosyl Hydrolase Family 10                               | 0.915                      |
| 2GGT   | 328           | NA        | Thioredoxin Fold                          | Chaperone                               | Glutaredoxin                             | Sco1/Senc                                                  | 0.927                      |
| 2H4G   | 299           | 3.1.3.48  | (Phosphotyrosine Protein) Phosphatases II | Hydrolase                               | Protein Tyrosine Phosphatase Superfamily | Protein-Tyrosine Phosphatase                               | 0.902                      |
| 2HV5   | 316           | 1.1.1.21  | Tim Beta/Alpha-Barrel                     | Oxidoreductase                          | Nadp-Dependent Oxidoreductase            | Aldo/Keto Reductase Family                                 | 0.913                      |
| 2HVN   | 316           | 1.1.1.21  | Tim Beta/Alpha-Barrel                     | Oxidoreductase                          | Nadp-Dependent Oxidoreductase            | Aldo/Keto Reductase Family                                 | 0.918                      |
| 2HVO   | 316           | 1.1.1.21  | Tim Beta/Alpha-Barrel                     | Oxidoreductase                          | Nadp-Dependent Oxidoreductase            | Aldo/Keto Reductase Family                                 | 0.912                      |
| 2IKG   | 316           | 1.1.1.21  | Tim Beta/Alpha-Barrel                     | Oxidoreductase                          | Nadp-Dependent Oxidoreductase            | Aldo/Keto Reductase Family                                 | 0.916                      |
| 2IKH   | 316           | 1.1.1.21  | Tim Beta/Alpha-Barrel                     | Oxidoreductase                          | Nadp-Dependent Oxidoreductase            | Aldo/Keto Reductase Family                                 | 0.914                      |
| 2IKJ   | 316           | 1.1.1.21  | Tim Beta/Alpha-Barrel                     | Oxidoreductase                          | Nadp-Dependent Oxidoreductase            | Aldo/Keto Reductase Family                                 | 0.905                      |
| 2INE   | 315           | 1.1.1.21  | Tim Beta/Alpha-Barrel                     | Oxidoreductase                          | Nadp-Dependent Oxidoreductase            | Aldo/Keto Reductase Family                                 | 0.909                      |
| 2INZ   | 315           | 1.1.1.21  | Tim Beta/Alpha-Barrel                     | Oxidoreductase                          | Nadp-Dependent Oxidoreductase            | Aldo/Keto Reductase Family                                 | 0.903                      |
| 2IQ0   | 315           | 1.1.1.21  | Tim Beta/Alpha-Barrel                     | Oxidoreductase                          | Nadp-Dependent Oxidoreductase            | Aldo/Keto Reductase Family                                 | 0.909                      |
| 2IQD   | 315           | 1.1.1.21  | Tim Beta/Alpha-Barrel                     | Oxidoreductase                          | Nadp-Dependent Oxidoreductase            | Aldo/Keto Reductase Family                                 | 0.909                      |
| 2ISF   | 315           | 1.1.1.21  | Tim Beta/Alpha-Barrel                     | Oxidoreductase                          | Nadp-Dependent Oxidoreductase            | Aldo/Keto Reductase Family                                 | 0.905                      |
| 2I8T   | 316           | 1.1.1.21  | Tim Beta/Alpha-Barrel                     | Oxidoreductase                          | Nadp-Dependent Oxidoreductase            | Aldo/Keto Reductase Family                                 | 0.903                      |
| 2NVC   | 316           | 1.1.1.21  | Tim Beta/Alpha-Barrel                     | Oxidoreductase                          | Nadp-Dependent Oxidoreductase            | Aldo/Keto Reductase Family                                 | 0.913                      |
| 2PD5   | 316           | 1.1.1.21  | NA                                        | Oxidoreductase                          | Nadp-Dependent Oxidoreductase            | Aldo/Keto Reductase Family                                 | 0.928                      |
| 2PD9   | 316           | 1.1.1.21  | NA                                        | Oxidoreductase                          | Nadp-Dependent Oxidoreductase            | Aldo/Keto Reductase Family                                 | 0.907                      |
| 2PDB   | 316           | 1.1.1.21  | NA                                        | Oxidoreductase                          | Nadp-Dependent Oxidoreductase            | Aldo/Keto Reductase Family                                 | 0.918                      |
| 2PDC   | 316           | 1.1.1.21  | NA                                        | Oxidoreductase                          | Nadp-Dependent Oxidoreductase            | Aldo/Keto Reductase Family                                 | 0.923                      |
| 2PDF   | 316           | 1.1.1.21  | NA                                        | Oxidoreductase                          | Nadp-Dependent Oxidoreductase            | Aldo/Keto Reductase Family                                 | 0.924                      |
| 2PDG   | 316           | 1.1.1.21  | Tim Beta/Alpha-Barrel                     | Oxidoreductase                          | Nadp-Dependent Oxidoreductase            | Aldo/Keto Reductase Family                                 | 0.909                      |
| 2PDH   | 316           | 1.1.1.21  | NA                                        | Oxidoreductase                          | Nadp-Dependent Oxidoreductase            | Aldo/Keto Reductase Family                                 | 0.907                      |
| 2PDI   | 316           | 1.1.1.21  | NA                                        | Oxidoreductase                          | Nadp-Dependent Oxidoreductase            | Aldo/Keto Reductase Family                                 | 0.912                      |
| 2PDJ   | 316           | 1.1.1.21  | NA                                        | Oxidoreductase                          | Nadp-Dependent Oxidoreductase            | Aldo/Keto Reductase Family                                 | 0.903                      |
| 2PDR   | 316           | 1.1.1.21  | NA                                        | Oxidoreductase                          | Nadp-Dependent Oxidoreductase            | Aldo/Keto Reductase Family                                 | 0.912                      |
| 2PDL   | 316           | 1.1.1.21  | NA                                        | Oxidoreductase                          | Nadp-Dependent Oxidoreductase            | Aldo/Keto Reductase Family                                 | 0.917                      |
| 2PDN   | 316           | 1.1.1.21  | NA                                        | Oxidoreductase                          | Nadp-Dependent Oxidoreductase            | Aldo/Keto Reductase Family                                 | 0.927                      |
| 2PDP   | 316           | 1.1.1.21  | NA                                        | Oxidoreductase                          | Nadp-Dependent Oxidoreductase            | Aldo/Keto Reductase Family                                 | 0.914                      |
| 2PDQ   | 316           | 1.1.1.21  | NA                                        | Oxidoreductase                          | Nadp-Dependent Oxidoreductase            | Aldo/Keto Reductase Family                                 | 0.904                      |
| 2PDW   | 316           | 1.1.1.21  | NA                                        | Oxidoreductase                          | Nadp-Dependent Oxidoreductase            | Aldo/Keto Reductase Family                                 | 0.904                      |
| 2PEV   | 316           | 1.1.1.21  | Tim Beta/Alpha-Barrel                     | Oxidoreductase                          | Nadp-Dependent Oxidoreductase            | Aldo/Keto Reductase Family                                 | 0.903                      |
| 2PGQ   | 304           | 3.4.21.5  | NA                                        | Hydrolase/Hydrolase Inhibitor           | Epsilon-Thrombin, Subunit L              | Thrombin Light Chain                                       | 0.902                      |
| 2PZN   | 316           | 1.1.1.21  | Tim Beta/Alpha-Barrel                     | Oxidoreductase                          | Nadp-Dependent Oxidoreductase            | Aldo/Keto Reductase Family                                 | 0.925                      |
| 2Q0N   | 312           | 2.7.11.1  | NA                                        | Transferase                             | Phosphorylase Kinase; Domain 1           | Protein Kinase Domain                                      | 0.902                      |
| 2QBR   | 299           | 3.1.3.48  | NA                                        | Hydrolase                               | Protein Tyrosine Phosphatase Superfamily | Protein-Tyrosine Phosphatase                               | 0.900                      |
| 2R24   | 316           | 1.1.1.21  | NA                                        | Oxidoreductase                          | Nadp-Dependent Oxidoreductase            | Aldo/Keto Reductase Family                                 | 0.927                      |
| 2RLC   | 328           | 3.5.1.24  | NA                                        | Hydrolase                               | Penicillin V Acylase; Chain A            | Linear Amide C-N Hydrolases, Chologlycine Hydrolase Family | 0.910                      |
| 2WOT   | 306           | 2.7.11.30 | NA                                        | Transferase                             | Transferase(Phosphotransferase) Domain 1 | Protein Kinase Domain                                      | 0.901                      |
| 2WOU   | 306           | 2.7.11.30 | NA                                        | Transferase                             | Phosphorylase Kinase; Domain 1           | Protein Kinase Domain                                      | 0.917                      |
| 3BCJ   | 316           | 1.1.1.21  | Tim Beta/Alpha-Barrel                     | Oxidoreductase                          | Nadp-Dependent Oxidoreductase            | Aldo/Keto Reductase Family                                 | 0.903                      |
| 3C3U   | 323           | 1.1.1.149 | Tim Beta/Alpha-Barrel                     | Oxidoreductase                          | Nadp-Dependent Oxidoreductase            | Aldo/Keto Reductase Family                                 | 0.906                      |
| 3D1V   | 289           | 2.4.2.1   | NA                                        | Transferase                             | NA                                       | Phosphorylase Superfamily                                  | 0.903                      |
| 3D42   | 316           | 3.1.3.48  | NA                                        | Hydrolase                               | Protein Tyrosine Phosphatase Superfamily | Protein-Tyrosine Phosphatase                               | 0.930                      |
| 3D9C   | 321           | 3.1.3.48  | NA                                        | Hydrolase                               | Protein Tyrosine Phosphatase Superfamily | Protein-Tyrosine Phosphatase                               | 0.914                      |
| 3DN5   | 316           | 1.1.1.21  | NA                                        | Oxidoreductase                          | Nadp-Dependent Oxidoreductase            | Aldo/Keto Reductase Family                                 | 0.921                      |
| 3FMN   | 372           | 2.7.11.24 | NA                                        | Signaling Protein, Transferase          | Phosphorylase Kinase; Domain 1           | Protein Kinase Domain                                      | 0.906                      |
| 3G5E   | 319           | 1.1.1.21  | NA                                        | Oxidoreductase                          | Nadp-Dependent Oxidoreductase            | Aldo/Keto Reductase Family                                 | 0.919                      |
| 3GHR   | 316           | 1.1.1.21  | NA                                        | Oxidoreductase                          | Nadp-Dependent Oxidoreductase            | Aldo/Keto Reductase Family                                 | 0.901                      |
| 3GHS   | 316           | 1.1.1.21  | NA                                        | Oxidoreductase                          | Nadp-Dependent Oxidoreductase            | Aldo/Keto Reductase Family                                 | 0.904                      |
| 3GHT   | 316           | 1.1.1.21  | NA                                        | Oxidoreductase                          | Nadp-Dependent Oxidoreductase            | Aldo/Keto Reductase Family                                 | 0.912                      |
| 3GHU   | 316           | 1.1.1.21  | NA                                        | Oxidoreductase                          | Nadp-Dependent Oxidoreductase            | Aldo/Keto Reductase Family                                 | 0.915                      |
| 3GUG   | 323           | 1.1.1.-   | NA                                        | Oxidoreductase                          | Nadp-Dependent Oxidoreductase            | Aldo/Keto Reductase Family                                 | 0.903                      |
| 3HMM   | 303           | 2.7.11.30 | NA                                        | Transferase                             | Transferase(Phosphotransferase) Domain 1 | Protein Kinase Domain                                      | 0.912                      |
| 3HRB   | 359           | 2.7.11.24 | NA                                        | Transferase                             | Phosphorylase Kinase; Domain 1           | Protein Kinase Domain                                      | 0.915                      |
| 3INY   | 289           | 2.4.2.1   | NA                                        | Transferase                             | NA                                       | Phosphorylase Superfamily                                  | 0.924                      |
| 3IEN   | 316           | 1.1.1.21  | NA                                        | Oxidoreductase/Oxidoreductase Inhibitor | Nadp-Dependent Oxidoreductase            | Aldo/Keto Reductase Family                                 | 0.916                      |
| 3M0I   | 316           | 1.1.1.21  | NA                                        | Oxidoreductase/Oxidoreductase Inhibitor | Nadp-Dependent Oxidoreductase            | Aldo/Keto Reductase Family                                 | 0.910                      |
| 3M4H   | 316           | 1.1.1.21  | NA                                        | Oxidoreductase/Oxidoreductase Inhibitor | Nadp-Dependent Oxidoreductase            | Aldo/Keto Reductase Family                                 | 0.907                      |
| 3M64   | 316           | 1.1.1.21  | NA                                        | Oxidoreductase/Oxidoreductase Inhibitor | Nadp-Dependent Oxidoreductase            | Aldo/Keto Reductase Family                                 | 0.909                      |
| 3MB9   | 316           | 1.1.1.21  | NA                                        | Oxidoreductase/Oxidoreductase Inhibitor | Nadp-Dependent Oxidoreductase            | Aldo/Keto Reductase Family                                 | 0.919                      |
| 3MC5   | 316           | 1.1.1.21  | NA                                        | Oxidoreductase/Oxidoreductase Inhibitor | Nadp-Dependent Oxidoreductase            | Aldo/Keto Reductase Family                                 | 0.915                      |
| 3MFR   | 351           | 2.7.11.1  | NA                                        | Transferase                             | Phosphorylase Kinase; Domain 1           | Protein Kinase Domain                                      | 0.911                      |
| 3MFS   | 351           | 2.7.11.1  | NA                                        | Transferase                             | Phosphorylase Kinase; Domain 1           | Protein Kinase Domain                                      | 0.912                      |
| 3MFT   | 351           | 2.7.11.1  | NA                                        | Transferase                             | Transferase(Phosphotransferase) Domain 1 | Protein Kinase Domain                                      | 0.903                      |
| 3MFU   | 351           | 2.7.11.1  | NA                                        | Transferase                             | Phosphorylase Kinase; Domain 1           | Protein Kinase Domain                                      | 0.917                      |
| 3P2V   | 316           | 1.1.1.21  | NA                                        | Oxidoreductase/Oxidoreductase Inhibitor | Nadp-Dependent Oxidoreductase            | Aldo/Keto Reductase Family                                 | 0.921                      |
| 3QKP   | 321           | 3.1.3.48  | NA                                        | Hydrolase                               | Protein Tyrosine Phosphatase Superfamily | Protein-Tyrosine Phosphatase                               | 0.902                      |

| PDB ID | Residue count | EC number | SCOPE fold | Classification                          | CATH description                         | Protein Family Annotation                           | Mean persistent similary |
|--------|---------------|-----------|------------|-----------------------------------------|------------------------------------------|-----------------------------------------------------|--------------------------|
| 3R43   | 331           | 1.~..     | NA         | Oxidoreductase/Oxidoreductase Inhibitor | Nadp-Dependent Oxidoreductase            | Aldo/Keto Reductase Family                          | 0.907                    |
| 3R58   | 331           | 1.~..     | NA         | Oxidoreductase/Oxidoreductase Inhibitor | Nadp-Dependent Oxidoreductase            | Aldo/Keto Reductase Family                          | 0.911                    |
| 3R6I   | 331           | 1.~..     | NA         | Oxidoreductase/Oxidoreductase Inhibitor | Nadp-Dependent Oxidoreductase            | Aldo/Keto Reductase Family                          | 0.903                    |
| 3R7M   | 331           | 1.1.1.213 | NA         | Oxidoreductase/Oxidoreductase Inhibitor | Nadp-Dependent Oxidoreductase            | Aldo/Keto Reductase Family                          | 0.926                    |
| 3R8G   | 331           | 1.~..     | NA         | Oxidoreductase/Oxidoreductase Inhibitor | Nadp-Dependent Oxidoreductase            | Aldo/Keto Reductase Family                          | 0.931                    |
| 3RX2   | 336           | 1.1.1.21  | NA         | Oxidoreductase                          | Nadp-Dependent Oxidoreductase            | Aldo/Keto Reductase Family                          | 0.907                    |
| 3RX3   | 336           | 1.1.1.21  | NA         | Oxidoreductase                          | Nadp-Dependent Oxidoreductase            | Aldo/Keto Reductase Family                          | 0.914                    |
| 3RX4   | 336           | 1.1.1.21  | NA         | Oxidoreductase                          | Nadp-Dependent Oxidoreductase            | Aldo/Keto Reductase Family                          | 0.924                    |
| 3S3G   | 336           | 1.1.1.21  | NA         | Oxidoreductase                          | Nadp-Dependent Oxidoreductase            | Aldo/Keto Reductase Family                          | 0.914                    |
| 3T42   | 319           | 1.1.1.21  | NA         | Oxidoreductase/Oxidoreductase Inhibitor | Nadp-Dependent Oxidoreductase            | Aldo/Keto Reductase Family                          | 0.905                    |
| 3U2C   | 316           | 1.1.1.21  | NA         | Oxidoreductase/Oxidoreductase Inhibitor | Nadp-Dependent Oxidoreductase            | Aldo/Keto Reductase Family                          | 0.910                    |
| 3UFY   | 331           | 1.1.1.213 | NA         | Oxidoreductase                          | Nadp-Dependent Oxidoreductase            | Aldo/Keto Reductase Family                          | 0.924                    |
| 3UG8   | 331           | 1.1.1.213 | NA         | Oxidoreductase                          | Nadp-Dependent Oxidoreductase            | Aldo/Keto Reductase Family                          | 0.913                    |
| 3UGR   | 331           | 1.1.1.213 | NA         | Oxidoreductase                          | Nadp-Dependent Oxidoreductase            | Aldo/Keto Reductase Family                          | 0.922                    |
| 3UWE   | 331           | 1.1.1.213 | NA         | Oxidoreductase                          | Nadp-Dependent Oxidoreductase            | Aldo/Keto Reductase Family                          | 0.901                    |
| 3V35   | 336           | 1.1.1.21  | NA         | Oxidoreductase                          | Nadp-Dependent Oxidoreductase            | Aldo/Keto Reductase Family                          | 0.917                    |
| 3V36   | 336           | 1.1.1.21  | NA         | Oxidoreductase                          | Nadp-Dependent Oxidoreductase            | Aldo/Keto Reductase Family                          | 0.902                    |
| 3VXF   | 315           | 3.4.21.5  | NA         | Hydrolase/Hydrolase Inhibitor           | NA                                       | Trypsin                                             | 0.907                    |
| 4ANP   | 324           | 1.14.16.1 | NA         | Oxidoreductase                          | Phenylalanine Hydroxylase                | Biopterin-Dependent Aromatic Amino Acid Hydroxylase | 0.901                    |
| 4AX9   | 296           | 3.4.21.5  | NA         | Hydrolase/Hydrolase Inhibitor           | Trypsin-Like Serine Proteases            | Trypsin                                             | 0.901                    |
| 4D0R   | 269           | 1.3.1.9   | NA         | Oxidoreductase                          | NA                                       | Enoyl-(Acyl Carrier Protein) Reductase              | 0.906                    |
| 4DZ5   | 331           | 1.~..     | NA         | Oxidoreductase                          | Nadp-Dependent Oxidoreductase            | Aldo/Keto Reductase Family                          | 0.908                    |
| 4E05   | 356           | 3.4.21.5  | NA         | Hydrolase/Hydrolase Inhibitor           | Trypsin-Like Serine Proteases            | Trypsin                                             | 0.916                    |
| 4E97   | 374           | 3.2.1.17  | NA         | Hydrolase                               | NA                                       | Phage Lysozyme                                      | 0.901                    |
| 4EKP   | 374           | 3.2.1.17  | NA         | Hydrolase                               | NA                                       | Phage Lysozyme                                      | 0.901                    |
| 4FA3   | 331           | 1.~..     | NA         | Oxidoreductase/Oxidoreductase Inhibitor | Nadp-Dependent Oxidoreductase            | Aldo/Keto Reductase Family                          | 0.925                    |
| 4FAL   | 331           | 1.1.1.213 | NA         | Oxidoreductase/Oxidoreductase Inhibitor | Nadp-Dependent Oxidoreductase            | Aldo/Keto Reductase Family                          | 0.907                    |
| 4FV0   | 360           | 2.7.11.24 | NA         | Transferase                             | Phosphorylase Kinase; Domain 1           | Protein Kinase Domain                               | 0.908                    |
| 4FV9   | 360           | 2.7.11.24 | NA         | Transferase                             | Phosphorylase Kinase; Domain 1           | Protein Kinase Domain                               | 0.908                    |
| 4G6N   | 360           | 2.7.11.24 | NA         | Transferase                             | Transferase(Phosphotransferase) Domain 1 | Protein Kinase Domain                               | 0.902                    |
| 4GCA   | 315           | 1.1.1.21  | NA         | Oxidoreductase/Oxidoreductase Inhibitor | NA                                       | Aldo/Keto Reductase Family                          | 0.906                    |
| 4H7C   | 331           | 1.~..     | NA         | Oxidoreductase/Oxidoreductase Inhibitor | Nadp-Dependent Oxidoreductase            | Aldo/Keto Reductase Family                          | 0.908                    |
| 4I7J   | 374           | 3.2.1.17  | NA         | Hydrolase                               | NA                                       | Phage Lysozyme                                      | 0.902                    |
| 4I7L   | 374           | 3.2.1.17  | NA         | Hydrolase                               | NA                                       | Phage Lysozyme                                      | 0.903                    |
| 4I7O   | 374           | 3.2.1.17  | NA         | Hydrolase                               | NA                                       | Phage Lysozyme                                      | 0.901                    |
| 4I7R   | 374           | 3.2.1.17  | NA         | Hydrolase                               | NA                                       | Phage Lysozyme                                      | 0.903                    |
| 4I7S   | 374           | 3.2.1.17  | NA         | Hydrolase                               | NA                                       | Phage Lysozyme                                      | 0.903                    |
| 4IGS   | 316           | 1.1.1.21  | NA         | Oxidoreductase/Oxidoreductase Inhibitor | NA                                       | Aldo/Keto Reductase Family                          | 0.913                    |
| 4JH    | 318           | 1.1.1.-   | NA         | Oxidoreductase/Oxidoreductase Inhibitor | NA                                       | Aldo/Keto Reductase Family                          | 0.927                    |
| 4JHR   | 316           | 1.1.1.21  | NA         | Oxidoreductase/Oxidoreductase Inhibitor | NA                                       | Aldo/Keto Reductase Family                          | 0.928                    |
| 4LAU   | 316           | 1.1.1.21  | NA         | Oxidoreductase                          | NA                                       | Aldo/Keto Reductase Family                          | 0.905                    |
| 4LAZ   | 316           | 1.1.1.21  | NA         | Oxidoreductase                          | NA                                       | Aldo/Keto Reductase Family                          | 0.904                    |
| 4LB3   | 316           | 1.1.1.21  | NA         | Oxidoreductase                          | NA                                       | Aldo/Keto Reductase Family                          | 0.905                    |
| 4LB4   | 316           | 1.1.1.21  | NA         | Oxidoreductase                          | NA                                       | Aldo/Keto Reductase Family                          | 0.904                    |
| 4LBR   | 316           | 1.1.1.21  | NA         | Oxidoreductase                          | NA                                       | Aldo/Keto Reductase Family                          | 0.901                    |
| 4LBS   | 316           | 1.1.1.21  | NA         | Oxidoreductase                          | NA                                       | Aldo/Keto Reductase Family                          | 0.902                    |
| 4NKC   | 315           | 1.1.1.21  | NA         | Oxidoreductase/Oxidoreductase Inhibitor | NA                                       | Aldo/Keto Reductase Family                          | 0.915                    |
| 4O6E   | 368           | 2.7.11.24 | NA         | Transferase/Transferase Inhibitor       | NA                                       | Protein Kinase Domain                               | 0.903                    |
| 4PR4   | 315           | 1.1.1.21  | NA         | Oxidoreductase/Oxidoreductase Inhibitor | NA                                       | Aldo/Keto Reductase Family                          | 0.917                    |
| 4PRR   | 315           | 1.1.1.21  | NA         | Oxidoreductase/Oxidoreductase Inhibitor | NA                                       | Aldo/Keto Reductase Family                          | 0.920                    |
| 4PRT   | 316           | 1.1.1.21  | NA         | Oxidoreductase/Oxidoreductase Inhibitor | NA                                       | Aldo/Keto Reductase Family                          | 0.911                    |
| 4PUU   | 316           | 1.1.1.21  | NA         | Oxidoreductase/Oxidoreductase Inhibitor | NA                                       | Aldo/Keto Reductase Family                          | 0.911                    |
| 4PUW   | 316           | 1.1.1.21  | NA         | Oxidoreductase/Oxidoreductase Inhibitor | NA                                       | Aldo/Keto Reductase Family                          | 0.914                    |
| 4Q7B   | 315           | 1.1.1.21  | NA         | Oxidoreductase/Oxidoreductase Inhibitor | NA                                       | Aldo/Keto Reductase Family                          | 0.913                    |
| 4QAH   | 299           | 3.1.3.48  | NA         | Hydrolase                               | NA                                       | Protein-Tyrosine Phosphatase                        | 0.914                    |
| 4QAP   | 299           | 3.1.3.48  | NA         | Hydrolase                               | NA                                       | Protein-Tyrosine Phosphatase                        | 0.908                    |
| 4QBE   | 298           | 3.1.3.48  | NA         | Hydrolase                               | NA                                       | Protein-Tyrosine Phosphatase                        | 0.905                    |
| 4QBW   | 299           | 3.1.3.48  | NA         | Hydrolase                               | NA                                       | Protein-Tyrosine Phosphatase                        | 0.910                    |
| 4QBX   | 316           | 1.1.1.21  | NA         | Oxidoreductase/Oxidoreductase Inhibitor | NA                                       | Aldo/Keto Reductase Family                          | 0.912                    |
| 4QX4   | 316           | 1.1.1.21  | NA         | Oxidoreductase/Oxidoreductase Inhibitor | NA                                       | Aldo/Keto Reductase Family                          | 0.910                    |
| 4RPQ   | 315           | 1.1.1.21  | NA         | Oxidoreductase/Oxidoreductase Inhibitor | NA                                       | Aldo/Keto Reductase Family                          | 0.916                    |
| 4WRH   | 331           | 1.~..     | NA         | Oxidoreductase/Oxidoreductase Inhibitor | NA                                       | Aldo/Keto Reductase Family                          | 0.909                    |
| 4X0M   | 305           | 2.7.11.30 | NA         | Transferase                             | NA                                       | Protein Kinase Domain                               | 0.914                    |
| 4X2F   | 305           | 2.7.11.30 | NA         | Transferase/Transferase Inhibitor       | NA                                       | Protein Kinase Domain                               | 0.915                    |

| PDB ID | Residue count | EC number | SCOPE fold | Classification                    | CATH description              | Protein Family Annotation           | Mean persistent similarity |
|--------|---------------|-----------|------------|-----------------------------------|-------------------------------|-------------------------------------|----------------------------|
| 4X2G   | 305           | 2.7.11.30 | NA         | Transferase/Transferase Inhibitor | NA                            | Protein Kinase Domain               | 0.909                      |
| 4X2J   | 305           | 2.7.11.30 | NA         | Transferase                       | NA                            | Protein Kinase Domain               | 0.916                      |
| 4X2K   | 305           | 2.7.11.30 | NA         | Transferase                       | NA                            | Protein Kinase Domain               | 0.916                      |
| 4X2N   | 305           | 2.7.11.30 | NA         | Transferase                       | NA                            | Protein Kinase Domain               | 0.920                      |
| 4XZI   | 316           | 1.1.1.21  | NA         | Oxidoreductase                    | NA                            | Aldo/Keto Reductase Family          | 0.905                      |
| 4YS1   | 316           | 1.1.1.21  | NA         | Oxidoreductase                    | NA                            | Aldo/Keto Reductase Family          | 0.908                      |
| 4YU1   | 316           | 1.1.1.21  | NA         | Oxidoreductase                    | NA                            | Aldo/Keto Reductase Family          | 0.924                      |
| 4ZRT   | 309           | 3.1.3.48  | NA         | Hydrolase                         | NA                            | Protein-Tyrosine Phosphatase        | 0.906                      |
| 4ZZN   | 350           | 2.7.11.24 | NA         | Transferase                       | NA                            | Protein Kinase Domain               | 0.906                      |
| 5E8Z   | 307           | 2.7.11.30 | NA         | Transferase/Transferase Inhibitor | NA                            | Protein Kinase Domain               | 0.908                      |
| 5GDS   | 321           | 3.4.21.5  | NA         | Hydrolase/Hydrolase Inhibitor     | Trypsin-Like Serine Proteases | Trypsin                             | 0.909                      |
| 5GIM   | 325           | 3.4.21.5  | NA         | Hydrolase/Hydrolase Inhibitor     | NA                            | Thrombin Light Chain                | 0.905                      |
| 5JFD   | 307           | 3.4.21.5  | NA         | Hydrolase                         | NA                            | Trypsin                             | 0.903                      |
| 5KAA   | 289           | 3.1.3.48  | NA         | Hydrolase                         | NA                            | Protein-Tyrosine Phosphatase        | 0.909                      |
| 5LUC   | 3224          | 2.6.1.51  | NA         | Transferase                       | NA                            | Aminotransferase Class-V            | 0.918                      |
| 5NHH   | 381           | 2.7.11.24 | NA         | Transferase                       | NA                            | Protein Kinase Domain               | 0.901                      |
| 5QIM   | 306           | 2.7.11.30 | NA         | Transferase/Transferase Inhibitor | NA                            | Protein Kinase Domain               | 0.908                      |
| 5TC6   | 297           | 2.4.2.28  | NA         | Transferase/Transferase Inhibitor | NA                            | Phosphorylase Superfamily           | 0.900                      |
| 5TC8   | 297           | 2.4.2.28  | NA         | Transferase/Transferase Inhibitor | NA                            | Phosphorylase Superfamily           | 0.904                      |
| 5TE0   | 347           | 2.7.11.1  | NA         | Transferase/Transferase Inhibitor | NA                            | Protein Kinase Domain               | 0.904                      |
| 5USQ   | 299           | 2.7.11.30 | NA         | Transferase/Transferase Inhibitor | NA                            | Protein Kinase Domain               | 0.910                      |
| 5Y7N   | 316           | 1.1.1.-   | NA         | Oxidoreductase                    | NA                            | Aldo/Keto Reductase Family          | 0.912                      |
| 6B8T   | 321           | 3.1.3.48  | NA         | Signaling Protein                 | NA                            | Protein-Tyrosine Phosphatase        | 0.903                      |
| 6B8X   | 321           | 3.1.3.48  | NA         | Signaling Protein                 | NA                            | Protein-Tyrosine Phosphatase        | 0.902                      |
| 6B8Y   | 307           | 2.7.11.30 | NA         | Transferase/Transferase Inhibitor | NA                            | Protein Kinase Domain               | 0.907                      |
| 6F7R   | 316           | 1.1.1.21  | NA         | Oxidoreductase                    | NA                            | Aldo/Keto Reductase Family          | 0.900                      |
| 6F81   | 316           | 1.1.1.21  | NA         | Oxidoreductase                    | NA                            | Aldo/Keto Reductase Family          | 0.904                      |
| 6F82   | 316           | 1.1.1.21  | NA         | Oxidoreductase                    | NA                            | Aldo/Keto Reductase Family          | 0.913                      |
| 6F84   | 316           | 1.1.1.21  | NA         | Oxidoreductase                    | NA                            | Aldo/Keto Reductase Family          | 0.916                      |
| 6F8O   | 317           | 1.1.1.21  | NA         | Oxidoreductase                    | NA                            | Aldo/Keto Reductase Family          | 0.905                      |
| 6G6J   | 354           | NA        | NA         | Apoptosis                         | NA                            | Helix-Loop-Helix Dna-Binding Domain | 0.905                      |
| 6GSX   | 368           | 2.7.11.24 | NA         | Signaling Protein                 | NA                            | Protein Kinase Domain               | 0.906                      |
| 6G91   | 368           | 2.7.11.24 | NA         | Signaling Protein                 | NA                            | Protein Kinase Domain               | 0.911                      |
| 6G9A   | 368           | 2.7.11.24 | NA         | Signaling Protein                 | NA                            | Protein Kinase Domain               | 0.920                      |
| 6G9K   | 368           | 2.7.11.24 | NA         | Signaling Protein                 | NA                            | Protein Kinase Domain               | 0.901                      |
| 6G9M   | 368           | 2.7.11.24 | NA         | Signaling Protein                 | NA                            | Protein Kinase Domain               | 0.910                      |
| 6NBS   | 367           | 2.7.11.24 | NA         | Transferase/Transferase Inhibitor | NA                            | Protein Kinase Domain               | 0.908                      |
| 6OMY   | 297           | 3.1.3.48  | NA         | Hydrolase                         | NA                            | Protein-Tyrosine Phosphatase        | 0.902                      |
| 6OPG   | 354           | 2.7.11.24 | NA         | Transferase                       | NA                            | Protein Kinase Domain               | 0.906                      |
| 6OPI   | 354           | 2.7.11.24 | NA         | Transferase                       | NA                            | Protein Kinase Domain               | 0.907                      |
| 6PFW   | 297           | 3.1.3.48  | NA         | Hydrolase                         | NA                            | Protein-Tyrosine Phosphatase        | 0.909                      |
| 6PG0   | 297           | 3.1.3.48  | NA         | Hydrolase                         | NA                            | Protein-Tyrosine Phosphatase        | 0.901                      |
| 6PHA   | 297           | 3.1.3.48  | NA         | Hydrolase                         | NA                            | Protein-Tyrosine Phosphatase        | 0.904                      |
| 6PHS   | 297           | 3.1.3.48  | NA         | Hydrolase                         | NA                            | Protein-Tyrosine Phosphatase        | 0.908                      |
| 6Q7S   | 368           | 2.7.11.24 | NA         | Signaling Protein                 | NA                            | Protein Kinase Domain               | 0.905                      |
| 6Q7T   | 368           | 2.7.11.24 | NA         | Signaling Protein                 | NA                            | Protein Kinase Domain               | 0.911                      |
| 6QA1   | 368           | 2.7.11.24 | NA         | Signaling Protein                 | NA                            | Protein Kinase Domain               | 0.921                      |
| 6QA4   | 368           | 2.7.11.24 | NA         | Signaling Protein                 | NA                            | Protein Kinase Domain               | 0.909                      |
| 6QAL   | 368           | 2.7.11.24 | NA         | Signaling Protein                 | NA                            | Protein Kinase Domain               | 0.924                      |
| 6QAW   | 368           | 2.7.11.24 | NA         | Signaling Protein                 | NA                            | Protein Kinase Domain               | 0.902                      |
| 6SLG   | 386           | 2.7.11.24 | NA         | Transferase                       | NA                            | Protein Kinase Domain               | 0.904                      |

| PDB ID | Residue count | EC number | SCOPE fold                           | Classification                    | CATH description                                                   | Protein Family Annotation                                    | Mean persistent similarity |
|--------|---------------|-----------|--------------------------------------|-----------------------------------|--------------------------------------------------------------------|--------------------------------------------------------------|----------------------------|
| 1NP0   | 978           | NA        | Tim Beta/Alpha-Barrel                | Hydrolase                         | Chitinase, Domain 2                                                | NA                                                           | 0.915                      |
| 1OGS   | 994           | 3.2.1.45  | Glycosyl Hydrolase Domain            | Hydrolase                         | Glycosidases                                                       | Glycosyl Hydrolase Family 30 Beta Sandwich Domain            | 0.907                      |
| 1OGU   | 1124          | 2.7.1.37  | Protein Kinase-Like (Pk-Like)        | Transferase                       | Transferase(Phosphotransferase) Domain 1                           | Protein Kinase Domain                                        | 0.924                      |
| 1OJ9   | 1124          | 2.7.1.37  | Protein Kinase-Like (Pk-Like)        | Kinase                            | Transferase(Phosphotransferase) Domain 1                           | Protein Kinase Domain                                        | 0.926                      |
| 1OJU   | 1124          | 2.7.1.37  | Protein Kinase-Like (Pk-Like)        | Kinase                            | Phosphorylase Kinase; Domain 1                                     | Protein Kinase Domain                                        | 0.930                      |
| 1OJY   | 1124          | 2.7.1.37  | Protein Kinase-Like (Pk-Like)        | Kinase                            | Transferase(Phosphotransferase) Domain 1                           | Protein Kinase Domain                                        | 0.926                      |
| 1OJ9   | 1040          | 1.4.3.4   | Fad/Nad(P)-Binding Domain            | Oxidoreductase                    | Guanine Nucleotide Dissociation Inhibitor, Domain 1                | Flavin Containing Amine Oxidoreductase                       | 0.917                      |
| 1OJC   | 1040          | 1.4.3.4   | Fad/Nad(P)-Binding Domain            | Oxidoreductase                    | Guanine Nucleotide Dissociation Inhibitor, Domain 1                | Flavin Containing Amine Oxidoreductase                       | 0.914                      |
| 1OKV   | 1128          | 2.7.1.37  | Protein Kinase-Like (Pk-Like)        | Transferase/Transferase Inhibitor | Phosphorylase Kinase; Domain 1                                     | Protein Kinase Domain                                        | 0.937                      |
| 1O82   | 990           | 3.4.24.65 | Zincin-Like                          | Hydrolase                         | Collagenase (Catalytic Domain)                                     | Matricin                                                     | 0.915                      |
| 1O89   | 990           | 3.4.24.65 | Zincin-Like                          | Hydrolase                         | Collagenase (Catalytic Domain)                                     | Matricin                                                     | 0.913                      |
| 1OZF   | 1132          | 4.1.3.18  | Dho-Like Nad/Fad-Binding Domain      | Lyase                             | Typ-Binding Domain                                                 | Thiamine Pyrophosphate Enzyme, N-Terminal Typ Binding Domain | 0.910                      |
| 1OZG   | 1132          | 4.1.3.18  | Dho-Like Nad/Fad-Binding Domain      | Lyase                             | Typ-Binding Domain                                                 | Thiamine Pyrophosphate Enzyme, N-Terminal Typ Binding Domain | 0.917                      |
| 1P5E   | 1114          | 2.7.1.-   | Protein Kinase-Like (Pk-Like)        | Cell Cycle                        | Transferase(Phosphotransferase) Domain 1                           | Protein Kinase Domain                                        | 0.931                      |
| 1PKD   | 1110          | 2.7.1.-   | Protein Kinase-Like (Pk-Like)        | Transferase/Cell Cycle            | Transferase(Phosphotransferase) Domain 1                           | Protein Kinase Domain                                        | 0.931                      |
| 1QMZ   | 1130          | 2.7.1.-   | Protein Kinase-Like (Pk-Like)        | Cell Cycle                        | Transferase(Phosphotransferase) Domain 1                           | Protein Kinase Domain                                        | 0.920                      |
| 1QR6   | 1108          | 1.1.1.39  | Nad(P)-Binding Rosemann-Fold Domains | Oxidoreductase                    | Aminozid Dehydrogenase-Like, N-Terminal Domain, Chain A            | Malic Enzyme, Nad Binding Domain                             | 0.906                      |
| 1S2Q   | 1040          | 1.4.3.4   | Fad/Nad(P)-Binding Domain            | Oxidoreductase                    | Guanine Nucleotide Dissociation Inhibitor, Domain 1                | Flavin Containing Amine Oxidoreductase                       | 0.912                      |
| 1S3B   | 1040          | 1.4.3.4   | Fad/Nad(P)-Binding Domain            | Oxidoreductase                    | Guanine Nucleotide Dissociation Inhibitor, Domain 1                | Flavin Containing Amine Oxidoreductase                       | 0.901                      |
| 1S3E   | 1040          | 1.4.3.4   | Fad/Nad(P)-Binding Domain            | Oxidoreductase                    | Guanine Nucleotide Dissociation Inhibitor, Domain 1                | Flavin Containing Amine Oxidoreductase                       | 0.916                      |
| 1URC   | 1128          | 2.7.1.37  | Protein Kinase-Like (Pk-Like)        | Transferase/Inhibitor             | Phosphorylase Kinase; Domain 1                                     | Protein Kinase Domain                                        | 0.916                      |
| 1VYW   | 1148          | 2.7.1.37  | Protein Kinase-Like (Pk-Like)        | Transferase                       | Phosphorylase Kinase; Domain 1                                     | Protein Kinase Domain                                        | 0.935                      |
| 1X6V   | 1260          | 2.7.7.4   | Pua Domain-Like                      | Transferase                       | P-Loop Containing Nucleotide Triphosphate Hydrolases               | Adenylylsulphate Kinase                                      | 0.910                      |
| 1XJQ   | 1260          | 2.7.7.4   | Pua Domain-Like                      | Transferase                       | Hsp9s                                                              | Atp-Sulphurylase                                             | 0.901                      |
| 1XMN   | 1180          | 3.4.21.5  | Trypsin-Like Serine Proteases        | Hydrolase/Hydrolase Inhibitor     | NA                                                                 | Thrombin Light Chain                                         | 0.916                      |
| 1XNJ   | 1260          | 2.7.7.4   | Pua Domain-Like                      | Transferase                       | P-Loop Containing Nucleotide Triphosphate Hydrolases               | Adenylylsulphate Kinase                                      | 0.902                      |
| 1Y7V   | 994           | 3.2.1.45  | Glycosyl Hydrolase Domain            | Hydrolase                         | Glycosidases                                                       | Glycosyl Hydrolase Family 30 Tim-Barrel Domain               | 0.902                      |
| 1YXU   | 1172          | 2.7.1.37  | NA                                   | Transferase                       | Phosphorylase Kinase; Domain 1                                     | Protein Kinase Domain                                        | 0.946                      |
| 2B5T   | 1048          | NA        | NA                                   | Blood Clotting                    | Epsilon-Thrombin, Subunit L                                        | Thrombin Light Chain                                         | 0.907                      |
| 2BK3   | 1040          | 1.4.3.4   | Fad/Nad(P)-Binding Domain            | Oxidoreductase                    | Guanine Nucleotide Dissociation Inhibitor, Domain 1                | Flavin Containing Amine Oxidoreductase                       | 0.916                      |
| 2BK4   | 1040          | 1.4.3.4   | Fad/Nad(P)-Binding Domain            | Oxidoreductase                    | Guanine Nucleotide Dissociation Inhibitor, Domain 1                | Flavin Containing Amine Oxidoreductase                       | 0.913                      |
| 2BKZ   | 1148          | 2.7.1.37  | Protein Kinase-Like (Pk-Like)        | Transferase                       | Phosphorylase Kinase; Domain 1                                     | Protein Kinase Domain                                        | 0.931                      |
| 2BPM   | 1148          | 2.7.1.37  | Protein Kinase-Like (Pk-Like)        | Transferase                       | Phosphorylase Kinase; Domain 1                                     | Protein Kinase Domain                                        | 0.933                      |
| 2BYB   | 1040          | 1.4.3.4   | Fad/Nad(P)-Binding Domain            | Oxidoreductase                    | Guanine Nucleotide Dissociation Inhibitor, Domain 1                | Flavin Containing Amine Oxidoreductase                       | 0.913                      |
| 2C4G   | 1148          | 2.7.1.37  | Protein Kinase-Like (Pk-Like)        | Transferase                       | Transferase(Phosphotransferase) Domain 1                           | Protein Kinase Domain                                        | 0.914                      |
| 2C5N   | 1114          | 2.7.1.37  | Protein Kinase-Like (Pk-Like)        | Transferase                       | Phosphorylase Kinase; Domain 1                                     | Protein Kinase Domain                                        | 0.923                      |
| 2C5O   | 1116          | 2.7.1.37  | Protein Kinase-Like (Pk-Like)        | Transferase                       | Transferase(Phosphotransferase) Domain 1                           | Protein Kinase Domain                                        | 0.922                      |
| 2C5V   | 1132          | 2.7.1.37  | Protein Kinase-Like (Pk-Like)        | Cell Cycle                        | Transferase(Phosphotransferase) Domain 1                           | Protein Kinase Domain                                        | 0.901                      |
| 2C5X   | 1114          | 2.7.1.37  | Protein Kinase-Like (Pk-Like)        | Transferase/Inhibitor             | Phosphorylase Kinase; Domain 1                                     | Protein Kinase Domain                                        | 0.920                      |
| 2C64   | 1040          | 1.4.3.4   | Fad/Nad(P)-Binding Domain            | Oxidoreductase                    | Guanine Nucleotide Dissociation Inhibitor, Domain 1                | Flavin Containing Amine Oxidoreductase                       | 0.918                      |
| 2C66   | 1040          | 1.4.3.4   | Fad/Nad(P)-Binding Domain            | Oxidoreductase                    | Guanine Nucleotide Dissociation Inhibitor, Domain 1                | Flavin Containing Amine Oxidoreductase                       | 0.901                      |
| 2C67   | 1040          | 1.4.3.4   | Fad/Nad(P)-Binding Domain            | Oxidoreductase                    | Guanine Nucleotide Dissociation Inhibitor, Domain 1                | Flavin Containing Amine Oxidoreductase                       | 0.913                      |
| 2C6F   | 1224          | 3.4.15.1  | NA                                   | Hydrolase                         | NA                                                                 | Angiotensin-Converting Enzyme                                | 0.909                      |
| 2C6N   | 1224          | 3.4.15.1  | NA                                   | Hydrolase/Hydrolase Inhibitor     | NA                                                                 | Angiotensin-Converting Enzyme                                | 0.908                      |
| 2C6T   | 1112          | 2.7.1.37  | Protein Kinase-Like (Pk-Like)        | Cell Cycle                        | Transferase(Phosphotransferase) Domain 1                           | Protein Kinase Domain                                        | 0.905                      |
| 2C70   | 1040          | 1.4.3.4   | Fad/Nad(P)-Binding Domain            | Oxidoreductase                    | Guanine Nucleotide Dissociation Inhibitor, Domain 1                | Flavin Containing Amine Oxidoreductase                       | 0.915                      |
| 2C73   | 1040          | 1.4.3.4   | Fad/Nad(P)-Binding Domain            | Oxidoreductase                    | Guanine Nucleotide Dissociation Inhibitor, Domain 1                | Flavin Containing Amine Oxidoreductase                       | 0.907                      |
| 2C75   | 1040          | 1.4.3.4   | Fad/Nad(P)-Binding Domain            | Oxidoreductase                    | Guanine Nucleotide Dissociation Inhibitor, Domain 1                | Flavin Containing Amine Oxidoreductase                       | 0.901                      |
| 2C76   | 1040          | 1.4.3.4   | Fad/Nad(P)-Binding Domain            | Oxidoreductase                    | Guanine Nucleotide Dissociation Inhibitor, Domain 1                | Flavin Containing Amine Oxidoreductase                       | 0.919                      |
| 2C8H   | 1142          | 2.7.1.-   | Protein Kinase-Like (Pk-Like)        | Cell Cycle                        | Phosphorylase Kinase; Domain 1                                     | Protein Kinase Domain                                        | 0.926                      |
| 2CCI   | 1174          | 2.7.11.22 | Protein Kinase-Like (Pk-Like)        | Cell Cycle                        | Transferase(Phosphotransferase) Domain 1                           | Protein Kinase Domain                                        | 0.912                      |
| 2CJM   | 1112          | 2.7.1.37  | Protein Kinase-Like (Pk-Like)        | Cell Cycle                        | Phosphorylase Kinase; Domain 1                                     | Protein Kinase Domain                                        | 0.926                      |
| 2F6I   | 994           | 3.2.1.45  | Glycosyl Hydrolase Domain            | Hydrolase                         | Glycosidases                                                       | Glycosyl Hydrolase Family 30 Beta Sandwich Domain            | 0.908                      |
| 2G1T   | 1200          | 2.7.1.112 | NA                                   | Transferase                       | Phosphorylase Kinase; Domain 1                                     | Protein Tyrosine Kinase                                      | 0.902                      |
| 2G9X   | 1122          | 2.7.1.37  | Protein Kinase-Like (Pk-Like)        | Transferase/Cell Cycle            | Transferase(Phosphotransferase) Domain 1                           | Protein Kinase Domain                                        | 0.903                      |
| 2I40   | 1116          | 2.7.11.22 | Protein Kinase-Like (Pk-Like)        | Transferase/Cell Cycle            | Phosphorylase Kinase; Domain 1                                     | Protein Kinase Domain                                        | 0.940                      |
| 2IW6   | 1124          | 2.7.1.37  | Protein Kinase-Like (Pk-Like)        | Cell Cycle                        | Phosphorylase Kinase; Domain 1                                     | Protein Kinase Domain                                        | 0.931                      |
| 2IW8   | 1124          | 2.7.1.37  | Protein Kinase-Like (Pk-Like)        | Cell Cycle                        | Transferase(Phosphotransferase) Domain 1                           | Protein Kinase Domain                                        | 0.922                      |
| 2IW9   | 1124          | 2.7.1.37  | Protein Kinase-Like (Pk-Like)        | Cell Cycle                        | Phosphorylase Kinase; Domain 1                                     | Protein Kinase Domain                                        | 0.918                      |
| 2J25   | 994           | 3.2.1.45  | Glycosyl Hydrolase Domain            | Hydrolase                         | Golgi Alpha-Mannosidase II                                         | Glycosyl Hydrolase Family 30 Tim-Barrel Domain               | 0.908                      |
| 2PMS   | 1148          | 3.1.1.8   | Alpha/Beta-Hydrolases                | Hydrolase                         | NA                                                                 | Carboxylesterase Family                                      | 0.927                      |
| 2PVY   | 1296          | 2.7.10.1  | NA                                   | Transferase                       | Transferase(Phosphotransferase) Domain 1                           | Protein Tyrosine Kinase                                      | 0.902                      |
| 2RD0   | 1375          | 2.7.1.153 | NA                                   | Transferase/Oncoprotein           | Phosphatidylinositol 3-Kinase Catalytic Subunit; Chain A, Domain 5 | P3-Kinase Family, P85-Binding Domain                         | 0.909                      |
| 2TUE   | 1124          | 2.7.11.1  | Protein Kinase-Like (Pk-Like)        | Transferase/Inhibitor             | Phosphorylase Kinase; Domain 1                                     | Protein Kinase Domain                                        | 0.924                      |
| 2U2B   | 1112          | 2.7.1.37  | NA                                   | Transferase                       | Phosphorylase Kinase; Domain 1                                     | Protein Kinase Domain                                        | 0.911                      |
| 2U2D   | 1112          | 2.7.11.22 | NA                                   | Transferase                       | Phosphorylase Kinase; Domain 1                                     | Protein Kinase Domain                                        | 0.921                      |
| 2U2E   | 1112          | 2.7.11.22 | NA                                   | Transferase                       | Transferase(Phosphotransferase) Domain 1                           | Protein Kinase Domain                                        | 0.922                      |
| 2U2L   | 1112          | 2.7.11.22 | NA                                   | Transferase                       | Phosphorylase Kinase; Domain 1                                     | Protein Kinase Domain                                        | 0.931                      |
| 2V22   | 1114          | 2.7.1.37  | NA                                   | Transferase                       | Phosphorylase Kinase; Domain 1                                     | Protein Kinase Domain                                        | 0.932                      |
| 2V3D   | 1010          | 3.2.1.45  | Glycosyl Hydrolase Domain            | Hydrolase                         | Golgi Alpha-Mannosidase II                                         | Glycosyl Hydrolase Family 30 Beta Sandwich Domain            | 0.917                      |
| 2V3E   | 1010          | 3.2.1.45  | Glycosyl Hydrolase Domain            | Hydrolase                         | Glycosidases                                                       | Glycosyl Hydrolase Family 30 Tim-Barrel Domain               | 0.907                      |
| 2V3F   | 1010          | 3.2.1.45  | Glycosyl Hydrolase Domain            | Hydrolase                         | Glycosidases                                                       | Glycosyl Hydrolase Family 30 Beta Sandwich Domain            | 0.921                      |
| 2V55   | 1212          | 2.7.11.1  | NA                                   | Transferase                       | Transferase(Phosphotransferase) Domain 1                           | Protein Kinase Domain                                        | 0.902                      |
| 2V5Z   | 1040          | 1.4.3.4   | Fad/Nad(P)-Binding Domain            | Oxidoreductase                    | Guanine Nucleotide Dissociation Inhibitor, Domain 1                | Flavin Containing Amine Oxidoreductase                       | 0.915                      |
| 2V60   | 1040          | 1.4.3.4   | Fad/Nad(P)-Binding Domain            | Oxidoreductase                    | Guanine Nucleotide Dissociation Inhibitor, Domain 1                | Flavin Containing Amine Oxidoreductase                       | 0.914                      |
| 2V61   | 1040          | 1.4.3.4   | Fad/Nad(P)-Binding Domain            | Oxidoreductase                    | Guanine Nucleotide Dissociation Inhibitor, Domain 1                | Flavin Containing Amine Oxidoreductase                       | 0.916                      |
| 2VRL   | 1040          | 1.4.3.4   | Fad/Nad(P)-Binding Domain            | Oxidoreductase                    | Guanine Nucleotide Dissociation Inhibitor, Domain 1                | Flavin Containing Amine Oxidoreductase                       | 0.915                      |
| 2VRM   | 1040          | 1.4.3.4   | Fad/Nad(P)-Binding Domain            | Oxidoreductase                    | Guanine Nucleotide Dissociation Inhibitor, Domain 1                | Flavin Containing Amine Oxidoreductase                       | 0.913                      |
| 2VT0   | 1010          | 3.2.1.45  | Glycosyl Hydrolase Domain            | Hydrolase                         | Glycosidases                                                       | Glycosyl Hydrolase Family 30 Beta Sandwich Domain            | 0.919                      |
| 2VZ2   | 1040          | 1.4.3.4   | NA                                   | Oxidoreductase                    | Guanine Nucleotide Dissociation Inhibitor, Domain 1                | Flavin Containing Amine Oxidoreductase                       | 0.909                      |
| 2WCG   | 1010          | 3.2.1.45  | NA                                   | Hydrolase                         | Glycosidases                                                       | Glycosyl Hydrolase Family 30 Beta Sandwich Domain            | 0.928                      |
| 2WEV   | 1128          | 2.7.1.37  | NA                                   | Transferase                       | Transferase(Phosphotransferase) Domain 1                           | Protein Kinase Domain                                        | 0.902                      |
| 2WFY   | 1128          | 2.7.1.37  | NA                                   | Transferase                       | Transferase(Phosphotransferase) Domain 1                           | Protein Kinase Domain                                        | 0.912                      |
| 2WHI   | 1148          | 2.7.1.37  | NA                                   | Transferase                       | Phosphorylase Kinase; Domain 1                                     | Protein Kinase Domain                                        | 0.938                      |
| 2WIL   | 1058          | 3.1.1.8   | NA                                   | Hydrolase                         | NA                                                                 | Carboxylesterase Family                                      | 0.925                      |
| 2WIP   | 1148          | 2.7.1.37  | NA                                   | Transferase                       | Phosphorylase Kinase; Domain 1                                     | Protein Kinase Domain                                        | 0.931                      |
| 2WKL   | 994           | 3.2.1.45  | NA                                   | Hydrolase                         | Golgi Alpha-Mannosidase II                                         | Glycosyl Hydrolase Family 30 Tim-Barrel Domain               | 0.926                      |
| 2WMA   | 1129          | 2.7.11.22 | NA                                   | Cell Cycle                        | Phosphorylase Kinase; Domain 1                                     | Protein Kinase Domain                                        | 0.921                      |
| 2WMB   | 1129          | 2.7.11.22 | NA                                   | Cell Cycle                        | Phosphorylase Kinase; Domain 1                                     | Protein Kinase Domain                                        | 0.921                      |
| 2WPA   | 1148          | 2.7.1.37  | NA                                   | Cell Cycle                        | Transferase(Phosphotransferase) Domain 1                           | Protein Kinase Domain                                        | 0.930                      |
| 2WXX   | 1148          | 2.7.1.37  | NA                                   | Transferase                       | Phosphorylase Kinase; Domain 1                                     | Protein Kinase Domain                                        | 0.927                      |
| 2XCG   | 1040          | 1.4.3.4   | NA                                   | Oxidoreductase                    | Guanine Nucleotide Dissociation Inhibitor, Domain 1                | Flavin Containing Amine Oxidoreductase                       | 0.912                      |

| PDB ID | Residue count | EC number | SCOPE fold                        | Classification                          | CATH description                                                           | Protein Family Annotation                                 | Mean persistent similary |
|--------|---------------|-----------|-----------------------------------|-----------------------------------------|----------------------------------------------------------------------------|-----------------------------------------------------------|--------------------------|
| 2XFN   | 1040          | 1.4.3.4   | NA                                | Oxidoreductase                          | Guanine Nucleotide Dissociation Inhibitor, Domain 1                        | Flavin Containing Amine Oxidoreductase                    | 0.916                    |
| 2XFO   | 1040          | 1.4.3.4   | NA                                | Oxidoreductase                          | Guanine Nucleotide Dissociation Inhibitor, Domain 1                        | Flavin Containing Amine Oxidoreductase                    | 0.918                    |
| 2XFP   | 1040          | 1.4.3.4   | NA                                | Oxidoreductase                          | Guanine Nucleotide Dissociation Inhibitor, Domain 1                        | Flavin Containing Amine Oxidoreductase                    | 0.907                    |
| 2XQP   | 1040          | 1.4.3.4   | NA                                | Oxidoreductase                          | Guanine Nucleotide Dissociation Inhibitor, Domain 1                        | Flavin Containing Amine Oxidoreductase                    | 0.914                    |
| 2XPU   | 1038          | 1.4.3.4   | NA                                | Oxidoreductase                          | Guanine Nucleotide Dissociation Inhibitor, Domain 1                        | Flavin Containing Amine Oxidoreductase                    | 0.913                    |
| 2XWD   | 1010          | 3.2.1.45  | NA                                | Hydrolase                               | Glycosidases                                                               | Glycosyl Hydrolase Family 30 Tim-Barrel Domain            | 0.930                    |
| 2XWE   | 1010          | 3.2.1.45  | NA                                | Hydrolase                               | Glycosidases                                                               | Glycosyl Hydrolase Family 30 Beta Sandwich Domain         | 0.925                    |
| 2ZC4   | 1356          | NA        | NA                                | Bioynthetic Protein                     | NA                                                                         | Penicillin-Binding Protein Dimerisation Domain            | 0.914                    |
| 3BHT   | 1124          | 2.7.11.22 | Protein Kinase-Like (Pk-Like)     | Transferase                             | Phosphorylase Kinase; Domain 1                                             | Protein Kinase; Domain                                    | 0.921                    |
| 3BHU   | 1124          | 2.7.11.22 | NA                                | Transferase                             | Transferase(Phosphotransferase) Domain 1                                   | Protein Kinase; Domain                                    | 0.923                    |
| 3BHV   | 1124          | 2.7.11.22 | NA                                | Transferase                             | Phosphorylase Kinase; Domain 1                                             | Protein Kinase; Domain                                    | 0.922                    |
| 3C4E   | 1092          | 2.7.11.1  | NA                                | Transferase                             | Transferase(Phosphotransferase) Domain 1                                   | Protein Kinase; Domain                                    | 0.937                    |
| 3CDG   | 1250          | NA        | Immunoglobulin-Like Beta-Sandwich | Immunne System                          | Murine Class I Major Histocompatibility Complex, H2-Db, Submit A, Domain 1 | Immunoglobulin C1-Set Domain                              | 0.908                    |
| 3DAK   | 1160          | 2.7.11.1  | NA                                | Transferase                             | Phosphorylase Kinase; Domain 1                                             | Protein Kinase; Domain                                    | 0.924                    |
| 3DDQ   | 1136          | 2.7.11.22 | NA                                | Transferase/Cell Cycle                  | Transferase(Phosphotransferase) Domain 1                                   | Protein Kinase; Domain                                    | 0.928                    |
| 3DG8   | 1216          | 1.5.1.3   | NA                                | Oxidoreductase, Transferase             | Dihydrofolate Reductase, Subunit A                                         | Dihydrofolate Reductase                                   | 0.902                    |
| 3DGA   | 1216          | 1.5.1.3   | NA                                | Oxidoreductase, Transferase             | Dihydrofolate Reductase, Subunit A                                         | Dihydrofolate Reductase                                   | 0.907                    |
| 3DOG   | 1126          | 2.7.11.22 | NA                                | Transferase, Cell Cycle                 | Phosphorylase Kinase; Domain 1                                             | Protein Kinase; Domain                                    | 0.932                    |
| 3DS6   | 1464          | 2.7.11.24 | Protein Kinase-Like (Pk-Like)     | Transferase                             | Transferase(Phosphotransferase) Domain 1                                   | Protein Kinase; Domain                                    | 0.923                    |
| 3EID   | 1116          | 2.7.11.22 | NA                                | Transferase/Cell Cycle                  | Phosphorylase Kinase; Domain 1                                             | Protein Kinase; Domain                                    | 0.931                    |
| 3EJ1   | 1116          | 2.7.11.22 | NA                                | Transferase/Cell Cycle                  | Phosphorylase Kinase; Domain 1                                             | Protein Kinase; Domain                                    | 0.929                    |
| 3EJL   | 1252          | 2.1.1.45  | NA                                | Transferase                             | Thymidylate Synthase, Chain A                                              | Thymidylate Synthase                                      | 0.911                    |
| 3ENM   | 1264          | 2.7.12.2  | NA                                | Transferase                             | NA                                                                         | Protein Kinase; Domain                                    | 0.903                    |
| 3F3Y   | 1140          | 2.8.2.14  | NA                                | Transferase                             | P-Loop Containing Nucleotide Triphosphate Hydrolases                       | Sulfotransferase Domain                                   | 0.904                    |
| 3F5X   | 1108          | 2.7.11.22 | NA                                | Transferase/Cell Cycle                  | Phosphorylase Kinase; Domain 1                                             | Protein Kinase; Domain                                    | 0.932                    |
| 3F9P   | 1162          | 1.11.1.7  | NA                                | Oxidoreductase                          | NA                                                                         | Animal Haem Peroxidase                                    | 0.905                    |
| 3FGA   | 1354          | NA        | NA                                | Hydrolase/Hydrolase Inhibitor           | Leucine-Rich Repeat Variant                                                | Heat Repeats                                              | 0.903                    |
| 3GG5   | 1252          | 2.1.1.45  | NA                                | Transferase                             | Thymidylate Synthase, Chain A                                              | Thymidylate Synthase                                      | 0.910                    |
| 3IYP   | 1241          | NA        | NA                                | Virus                                   | NA                                                                         | Picornavirus Capsid Protein                               | 0.903                    |
| 3KE0   | 994           | 3.2.1.45  | NA                                | Hydrolase                               | Glycosidases                                                               | Glycosyl Hydrolase Family 30 Tim-Barrel Domain            | 0.911                    |
| 3KEH   | 994           | 3.2.1.45  | NA                                | Hydrolase                               | Glycosidases                                                               | Glycosyl Hydrolase Family 30 Beta Sandwich Domain         | 0.908                    |
| 3LAT   | 875           | 3.2.1.20  | NA                                | Hydrolase                               | NA                                                                         | N-Terminal Barrel Of Nngam And Cungam, Malase-Gluconylase | 0.905                    |
| 3L4V   | 875           | 3.2.1.20  | NA                                | Hydrolase                               | NA                                                                         | N-Terminal Barrel Of Nngam And Cungam, Malase-Gluconylase | 0.906                    |
| 3L4W   | 875           | 3.2.1.20  | NA                                | Hydrolase                               | NA                                                                         | N-Terminal Barrel Of Nngam And Cungam, Malase-Gluconylase | 0.912                    |
| 3L4X   | 875           | 3.2.1.20  | NA                                | Hydrolase                               | NA                                                                         | N-Terminal Barrel Of Nngam And Cungam, Malase-Gluconylase | 0.901                    |
| 3L4Z   | 875           | 3.2.1.20  | NA                                | Hydrolase                               | NA                                                                         | N-Terminal Barrel Of Nngam And Cungam, Malase-Gluconylase | 0.913                    |
| 3LJI   | 1090          | 3.1.1.7   | NA                                | Hydrolase                               | NA                                                                         | Carboxylesterase Family                                   | 0.907                    |
| 3LMY   | 1112          | 3.2.1.52  | NA                                | Hydrolase                               | Glycosidases                                                               | Beta-Acetyl Hexosaminidase Like                           | 0.913                    |
| 3MY3   | 1124          | 2.7.11.22 | NA                                | Transferase/Protein Binding/Inhibitor   | Phosphorylase Kinase; Domain 1                                             | Protein Kinase; Domain                                    | 0.926                    |
| 3O9M   | 1148          | 3.1.1.8   | NA                                | Hydrolase                               | NA                                                                         | Carboxylesterase Family                                   | 0.920                    |
| 3ORI   | 1244          | NA        | NA                                | Transferase                             | Phosphorylase Kinase; Domain 1                                             | Protein Kinase; Domain                                    | 0.904                    |
| 3P1M   | 1056          | NA        | NA                                | Electron Transport                      | NA                                                                         | 26-2c Iron-Sulfur Cluster Binding Domain                  | 0.913                    |
| 3P70   | 1464          | 3.4.21.5  | NA                                | Hydrolase                               | NA                                                                         | Thrombin Light Chain                                      | 0.920                    |
| 3POT   | 1040          | 1.4.3.4   | NA                                | Oxidoreductase/Oxidoreductase Inhibitor | Guanine Nucleotide Dissociation Inhibitor, Domain 1                        | Flavin Containing Amine Oxidoreductase                    | 0.914                    |
| 3QBH   | 1158          | 2.7.11.22 | NA                                | Transferase/Protein Binding             | Phosphorylase Kinase; Domain 1                                             | Protein Kinase; Domain                                    | 0.901                    |
| 3TNW   | 1124          | 2.7.11.22 | NA                                | Transferase/Transferase Inhibitor       | Transferase(Phosphotransferase) Domain 1                                   | Protein Kinase; Domain                                    | 0.922                    |
| 3UWE   | 1170          | 5.1.1.1   | NA                                | Isomerase                               | Lyase, Ornithine Decarboxylase; Chain A, Domain 1                          | Alanine Racemase, N-Terminal Domain                       | 0.906                    |
| 3WJA   | 1160          | 1.1.1.40  | NA                                | Oxidoreductase                          | NA                                                                         | Male Enzyme, Nrd Binding Domain                           | 0.920                    |
| 3ZC6   | 1152          | 2.7.10.2  | NA                                | Transferase                             | NA                                                                         | Protein Tyrosine Kinase                                   | 0.925                    |
| 3ZEP   | 1152          | 2.7.10.2  | NA                                | Transferase                             | NA                                                                         | Protein Tyrosine Kinase                                   | 0.916                    |
| 3ZHP   | 1268          | NA        | NA                                | Cell Cycle                              | Leucine-Rich Repeat Variant                                                | Mo25-Like                                                 | 0.913                    |
| 3ZLK   | 1212          | 2.7.7.74  | NA                                | Transferase                             | Spore Coat Polysaccharide Biosynthesis Protein Spcs, Chain A               | Nucleotidyl Transferase                                   | 0.912                    |
| 3ZS0   | 1150          | 1.11.2.2  | NA                                | Oxidoreductase                          | NA                                                                         | Animal Haem Peroxidase                                    | 0.917                    |
| 3ZS1   | 1162          | 1.11.2.2  | NA                                | Oxidoreductase                          | NA                                                                         | Animal Haem Peroxidase                                    | 0.913                    |
| 4A55   | 1375          | 2.7.1.153 | NA                                | Transferase                             | NA                                                                         | P3-Kinase Family, Ras-Binding Domain                      | 0.911                    |
| 4A69   | 940           | 3.5.1.98  | NA                                | Transcription                           | NA                                                                         | Histone Deacetylase Domain                                | 0.914                    |
| 4A79   | 1040          | 1.4.3.4   | NA                                | Oxidoreductase                          | Guanine Nucleotide Dissociation Inhibitor, Domain 1                        | Flavin Containing Amine Oxidoreductase                    | 0.914                    |
| 4A7A   | 1040          | 1.4.3.4   | NA                                | Oxidoreductase                          | Guanine Nucleotide Dissociation Inhibitor, Domain 1                        | Flavin Containing Amine Oxidoreductase                    | 0.917                    |
| 4AQD   | 1062          | 3.1.1.8   | NA                                | Hydrolase                               | NA                                                                         | Carboxylesterase Family                                   | 0.911                    |
| 4ARW   | 1208          | 2.7.7.74  | NA                                | Transferase                             | Spore Coat Polysaccharide Biosynthesis Protein Spcs, Chain A               | Nucleotidyl Transferase                                   | 0.908                    |
| 4ASJ   | 1172          | 2.7.7.74  | NA                                | Transferase                             | Spore Coat Polysaccharide Biosynthesis Protein Spcs, Chain A               | Nucleotidyl Transferase                                   | 0.907                    |
| 4B2W   | 1212          | 2.7.7.74  | NA                                | Transferase                             | NA                                                                         | Nucleotidyl Transferase                                   | 0.901                    |
| 4B42   | 1212          | 2.7.7.74  | NA                                | Transferase                             | Spore Coat Polysaccharide Biosynthesis Protein Spcs, Chain A               | Nucleotidyl Transferase                                   | 0.903                    |
| 4B4G   | 1212          | 2.7.7.74  | NA                                | Transferase                             | Spore Coat Polysaccharide Biosynthesis Protein Spcs, Chain A               | Nucleotidyl Transferase                                   | 0.911                    |
| 4B4M   | 1212          | 2.7.7.74  | NA                                | Transferase                             | Spore Coat Polysaccharide Biosynthesis Protein Spcs, Chain A               | Nucleotidyl Transferase                                   | 0.908                    |
| 4BBE   | 1192          | 2.7.10.2  | NA                                | Transferase                             | Transferase(Phosphotransferase) Domain 1                                   | Protein Tyrosine Kinase                                   | 0.910                    |
| 4BBF   | 1192          | 2.7.10.2  | NA                                | Transferase                             | Transferase(Phosphotransferase) Domain 1                                   | Protein Tyrosine Kinase                                   | 0.905                    |
| 4BCM   | 1126          | 2.7.11.22 | NA                                | Transferase/Cell Cycle                  | Transferase(Phosphotransferase) Domain 1                                   | Protein Kinase; Domain                                    | 0.923                    |
| 4BCN   | 1124          | 2.7.11.22 | NA                                | Transferase/Cell Cycle                  | Transferase(Phosphotransferase) Domain 1                                   | Protein Kinase; Domain                                    | 0.929                    |
| 4BCO   | 1124          | 2.7.11.22 | NA                                | Transferase/Cell Cycle                  | Transferase(Phosphotransferase) Domain 1                                   | Protein Kinase; Domain                                    | 0.929                    |
| 4BCP   | 1124          | 2.7.11.22 | NA                                | Transferase/Cell Cycle                  | NA                                                                         | Protein Kinase; Domain                                    | 0.923                    |
| 4BXX   | 1258          | 3.2.1.-   | NA                                | Hydrolase                               | NA                                                                         | Angiotensin-Converting Enzyme                             | 0.908                    |
| 4C1M   | 1150          | 1.11.2.2  | NA                                | Oxidoreductase                          | NA                                                                         | Animal Haem Peroxidase                                    | 0.908                    |
| 4CFM   | 1122          | 2.7.11.22 | NA                                | Cell Cycle                              | NA                                                                         | Protein Kinase; Domain                                    | 0.925                    |
| 4CFN   | 1120          | 2.7.11.22 | NA                                | Cell Cycle                              | NA                                                                         | Protein Kinase; Domain                                    | 0.934                    |
| 4CFU   | 1130          | 2.7.11.22 | NA                                | Transferase                             | NA                                                                         | Protein Kinase; Domain                                    | 0.930                    |
| 4CFV   | 1130          | 2.7.11.22 | NA                                | Transferase                             | NA                                                                         | Protein Kinase; Domain                                    | 0.932                    |
| 4CFW   | 1122          | 2.7.11.22 | NA                                | Cell Cycle                              | NA                                                                         | Protein Kinase; Domain                                    | 0.915                    |
| 4CH8   | 1236          | 3.4.21.5  | NA                                | Hydrolase/Peptide                       | NA                                                                         | Thrombin Light Chain                                      | 0.906                    |
| 4COO   | 1126          | 4.2.1.22  | NA                                | Lyase                                   | NA                                                                         | Cls Domain                                                | 0.913                    |
| 4CTT   | 1040          | 1.4.3.4   | NA                                | Oxidoreductase                          | NA                                                                         | Flavin Containing Amine Oxidoreductase                    | 0.913                    |
| 4E4M   | 1208          | 2.7.10.2  | NA                                | Transferase/Transferase Inhibitor       | Phosphorylase Kinase; Domain 1                                             | Protein Tyrosine Kinase                                   | 0.919                    |
| 4EOI   | 1114          | 2.7.11.22 | NA                                | Transferase/Transferase Inhibitor       | Phosphorylase Kinase; Domain 1                                             | Protein Kinase; Domain                                    | 0.926                    |
| 4EOJ   | 1120          | 2.7.11.22 | NA                                | Transferase, Cell Cycle                 | Phosphorylase Kinase; Domain 1                                             | Protein Kinase; Domain                                    | 0.918                    |
| 4EOK   | 1116          | 2.7.11.22 | NA                                | Transferase/Transferase Inhibitor       | Phosphorylase Kinase; Domain 1                                             | Protein Kinase; Domain                                    | 0.922                    |
| 4EOL   | 1116          | 2.7.11.22 | NA                                | Transferase/Transferase Inhibitor       | Phosphorylase Kinase; Domain 1                                             | Protein Kinase; Domain                                    | 0.926                    |
| 4EOM   | 1118          | 2.7.11.22 | NA                                | Transferase, Cell Cycle                 | Phosphorylase Kinase; Domain 1                                             | Protein Kinase; Domain                                    | 0.921                    |
| 4EON   | 1116          | 2.7.11.22 | NA                                | Transferase/Transferase Inhibitor       | Phosphorylase Kinase; Domain 1                                             | Protein Kinase; Domain                                    | 0.929                    |
| 4EOO   | 1114          | 2.7.11.22 | NA                                | Transferase, Cell Cycle                 | Transferase(Phosphotransferase) Domain 1                                   | Protein Kinase; Domain                                    | 0.910                    |
| 4EOP   | 1116          | 2.7.11.22 | NA                                | Transferase/Transferase Inhibitor       | Transferase(Phosphotransferase) Domain 1                                   | Protein Kinase; Domain                                    | 0.922                    |
| 4EOQ   | 1118          | 2.7.11.22 | NA                                | Transferase, Cell Cycle                 | Transferase(Phosphotransferase) Domain 1                                   | Protein Kinase; Domain                                    | 0.926                    |
| 4EOR   | 1112          | 2.7.11.22 | NA                                | Transferase/Transferase Inhibitor       | Transferase(Phosphotransferase) Domain 1                                   | Protein Kinase; Domain                                    | 0.918                    |
| 4E08   | 1116          | 2.7.11.22 | NA                                | Transferase/Transferase Inhibitor       | Transferase(Phosphotransferase) Domain 1                                   | Protein Kinase; Domain                                    | 0.915                    |
| 4EXM   | 1388          | 3.2.1.17  | NA                                | Toxin, Hydrolase                        | NA                                                                         | Phage Lysozyme                                            | 0.908                    |
| 4EY4   | 1084          | 3.1.1.7   | NA                                | Hydrolase                               | NA                                                                         | Carboxylesterase Family                                   | 0.909                    |
| 4FX3   | 1112          | 2.7.11.22 | NA                                | Transferase/Transferase Inhibitor       | NA                                                                         | Protein Kinase; Domain                                    | 0.927                    |
| 4HHI   | 1272          | 2.1.1.45  | NA                                | Transferase                             | NA                                                                         | Thymidylate Synthase                                      | 0.910                    |

| PDB ID | Residue count | EC number | SCOPE fold | Classification                        | CATH description               | Protein Family Annotation                                             | Mean persistent similary |
|--------|---------------|-----------|------------|---------------------------------------|--------------------------------|-----------------------------------------------------------------------|--------------------------|
| 4HZS   | 1364          | 2.7.10.2  | NA         | Transferase                           | NA                             | Variant Sh3 Domain                                                    | 0.902                    |
| 4I3Z   | 1106          | 2.7.11.22 | NA         | Transferase/Cell Cycle                | Phosphorylase Kinase; Domain 1 | Protein Kinase Domain                                                 | 0.919                    |
| 4II5   | 1112          | 2.7.11.22 | NA         | Transferase/Cell Cycle                | Phosphorylase Kinase; Domain 1 | Protein Kinase Domain                                                 | 0.925                    |
| 4ILS   | 1170          | NA        | NA         | Structural Genomics. Unknown Function | Alanine Racemase               | Alanine Racemase. C-Terminal Domain                                   | 0.938                    |
| 4IQR   | 1484          | NA        | NA         | Transcription/Dna                     | NA                             | Zinc Finger. C4 Type (Two Domains)                                    | 0.905                    |
| 4JWU   | 1056          | 1.14.15.1 | NA         | Oxidoreductase/Electron Transport     | NA                             | Cytochrome P450                                                       | 0.922                    |
| 4O1X   | 1300          | 2.1.1.45  | NA         | Transferase                           | NA                             | Thymidylate Synthase                                                  | 0.905                    |
| 4RIW   | 1342          | 2.7.10.1  | NA         | Transferase                           | NA                             | Protein Tyrosine Kinase                                               | 0.923                    |
| 4RIX   | 1342          | 2.7.10.1  | NA         | Transferase                           | NA                             | Protein Tyrosine Kinase                                               | 0.923                    |
| 4RIY   | 1342          | 2.7.10.1  | NA         | Transferase                           | NA                             | Protein Tyrosine Kinase                                               | 0.915                    |
| 4TPK   | 1204          | 3.1.1.8   | NA         | Hydrolase                             | NA                             | Carboxylesterase Family                                               | 0.915                    |
| 4UP1   | 1252          | 2.1.1.45  | NA         | Transferase                           | NA                             | Thymidylate Synthase                                                  | 0.905                    |
| 4XII   | 1088          | 3.1.1.8   | NA         | Hydrolase                             | NA                             | Carboxylesterase Family                                               | 0.923                    |
| 4YKN   | 1383          | 2.7.1.153 | NA         | Transferase/Transferase Inhibitor     | NA                             | Phosphatidylinositol 3-Kinase Regulatory Subunit P85 Inter-Sh2 Domain | 0.918                    |
| 4YZ9   | 1215          | 2.7.11.1  | NA         | Transferase/Transferase Inhibitor     | NA                             | Protein Kinase Domain                                                 | 0.914                    |
| 4YZD   | 1215          | 2.7.11.1  | NA         | Transferase                           | NA                             | Protein Kinase Domain                                                 | 0.942                    |
| 4Z16   | 1264          | 2.7.10.2  | NA         | Transferase/Transferase Inhibitor     | NA                             | Protein Tyrosine Kinase                                               | 0.915                    |
| 5CYI   | 1126          | 2.7.11.22 | NA         | Transferase                           | NA                             | Protein Kinase Domain                                                 | 0.919                    |
| 5D6R   | 1158          | 2.2.1.6   | NA         | Transferase                           | NA                             | Thiamine Pyrophosphate Enzyme. N-Terminal Tpp Binding Domain          | 0.912                    |
| 5DX6   | 1158          | 2.2.1.6   | NA         | Transferase                           | NA                             | Thiamine Pyrophosphate Enzyme. N-Terminal Tpp Binding Domain          | 0.922                    |
| 5DYT   | 1060          | 3.1.1.8   | NA         | Hydrolase                             | NA                             | Carboxylesterase Family                                               | 0.914                    |
| 5DYW   | 1060          | 3.1.1.8   | NA         | Hydrolase                             | NA                             | Carboxylesterase Family                                               | 0.909                    |
| 5DYY   | 1060          | 3.1.1.8   | NA         | Hydrolase                             | NA                             | Carboxylesterase Family                                               | 0.915                    |
| 5F19   | 1104          | 1.14.99.1 | NA         | Oxidoreductase/Inhibitor              | NA                             | Egf-Like Domain                                                       | 0.904                    |
| 5F1A   | 1106          | 1.14.99.1 | NA         | Oxidoreductase/Inhibitor              | NA                             | Animal Haem Peroxidase                                                | 0.913                    |
| 5FBH   | 1136          | NA        | NA         | Signaling Protein                     | NA                             | Receptor Family Ligand Binding Region                                 | 0.909                    |
| 5FBK   | 1136          | NA        | NA         | Signaling Protein                     | NA                             | Receptor Family Ligand Binding Region                                 | 0.922                    |
| 5FTW   | 1142          | 1.11.2.2  | NA         | Oxidoreductase                        | NA                             | Animal Haem Peroxidase                                                | 0.920                    |
| 5FOS   | 1812          | 3.4.21.47 | NA         | Lipid Binding                         | NA                             | Mg2 Domain                                                            | 0.925                    |
| 5FOQ   | 1096          | 3.1.1.7   | NA         | Hydrolase                             | NA                             | Carboxylesterase Family                                               | 0.915                    |
| 5FPQ   | 1084          | 3.1.1.7   | NA         | Hydrolase                             | NA                             | Carboxylesterase Family                                               | 0.914                    |
| 5FTS   | 1212          | 2.7.7.24  | NA         | Transferase                           | NA                             | Nucleotidyl Transferase                                               | 0.905                    |
| 5FTV   | 1212          | 2.7.7.24  | NA         | Transferase                           | NA                             | Nucleotidyl Transferase                                               | 0.906                    |
| 5FU0   | 1212          | 2.7.7.24  | NA         | Transferase                           | NA                             | Nucleotidyl Transferase                                               | 0.903                    |
| 5FU8   | 1212          | 2.7.7.24  | NA         | Transferase                           | NA                             | Nucleotidyl Transferase                                               | 0.904                    |
| 5FUH   | 1212          | 2.7.7.24  | NA         | Transferase                           | NA                             | Nucleotidyl Transferase                                               | 0.901                    |
| 5FYE   | 1212          | 2.7.7.24  | NA         | Transferase                           | NA                             | Nucleotidyl Transferase                                               | 0.907                    |
| 5HF6   | 1084          | 3.1.1.7   | NA         | Hydrolase                             | NA                             | Carboxylesterase Family                                               | 0.923                    |
| 5HF8   | 1084          | 3.1.1.7   | NA         | Hydrolase                             | NA                             | Carboxylesterase Family                                               | 0.915                    |
| 5HF9   | 1084          | 3.1.1.7   | NA         | Hydrolase                             | NA                             | Carboxylesterase Family                                               | 0.912                    |
| 5HIE   | 1208          | 2.7.11.1  | NA         | Transferase/Transferase Inhibitor     | NA                             | Protein Tyrosine Kinase                                               | 0.929                    |
| 5IF1   | 1126          | 2.7.11.22 | NA         | Transferase                           | NA                             | Protein Kinase Domain                                                 | 0.924                    |
| 5IKQ   | 1102          | 1.14.99.1 | NA         | Oxidoreductase                        | NA                             | Animal Haem Peroxidase                                                | 0.910                    |
| 5IKR   | 1102          | 1.14.99.1 | NA         | Oxidoreductase                        | NA                             | Animal Haem Peroxidase                                                | 0.913                    |
| 5IKT   | 1102          | 1.14.99.1 | NA         | Oxidoreductase                        | NA                             | Animal Haem Peroxidase                                                | 0.915                    |
| 5IKV   | 1102          | 1.14.99.1 | NA         | Oxidoreductase                        | NA                             | Egf-Like Domain                                                       | 0.912                    |
| 5IQ8   | 1052          | 3.5.2.6   | NA         | Hydrolase                             | NA                             | Beta-Lactamase Enzyme Family                                          | 0.900                    |
| 5JG8   | 1172          | 3.1.4.12  | NA         | Hydrolase                             | NA                             | Calcineurin-Like Phosphoesterase                                      | 0.924                    |
| 5K5E   | 1058          | 3.1.1.8   | NA         | Hydrolase                             | NA                             | Carboxylesterase Family                                               | 0.927                    |
| 5K5S   | 1230          | NA        | NA         | Signaling Protein                     | NA                             | Receptor Family Ligand Binding Region                                 | 0.919                    |
| 5KIR   | 1102          | 1.14.99.1 | NA         | Oxidoreductase                        | NA                             | Animal Haem Peroxidase                                                | 0.907                    |
| 5LKR   | 1148          | 3.1.1.8   | NA         | Hydrolase                             | NA                             | Carboxylesterase Family                                               | 0.920                    |
| 5LMK   | 1112          | 2.7.11.22 | NA         | Transferase                           | NA                             | Protein Kinase Domain                                                 | 0.920                    |
| 5LVP   | 1304          | 2.7.11.1  | NA         | Transferase                           | NA                             | Protein Kinase Domain                                                 | 0.909                    |
| 5MRL   | 1040          | 1.4.3.4   | NA         | Oxidoreductase                        | NA                             | Flavin Containing Amine Oxidoreductase                                | 0.920                    |
| 5NEV   | 1126          | 2.7.11.22 | NA         | Transferase                           | NA                             | Protein Kinase Domain                                                 | 0.918                    |
| 5OY6   | 1204          | 2.7.11.30 | NA         | Signaling Protein                     | NA                             | Protein Tyrosine Kinase                                               | 0.905                    |
| 5QQQ   | 938           | 2.3.1.37  | NA         | Transferase                           | NA                             | Aminotransferase Class I And II                                       | 0.911                    |
| 5QQR   | 938           | 2.3.1.37  | NA         | Transferase                           | NA                             | Aminotransferase Class I And II                                       | 0.909                    |
| 5QQS   | 938           | 2.3.1.37  | NA         | Transferase                           | NA                             | Aminotransferase Class I And II                                       | 0.907                    |
| 5QQT   | 938           | 2.3.1.37  | NA         | Transferase                           | NA                             | Aminotransferase Class I And II                                       | 0.910                    |
| 5QQU   | 938           | 2.3.1.37  | NA         | Transferase                           | NA                             | Aminotransferase Class I And II                                       | 0.907                    |
| 5QQV   | 938           | 2.3.1.37  | NA         | Transferase                           | NA                             | Aminotransferase Class I And II                                       | 0.903                    |
| 5QQW   | 938           | 2.3.1.37  | NA         | Transferase                           | NA                             | Aminotransferase Class I And II                                       | 0.909                    |
| 5QQX   | 938           | 2.3.1.37  | NA         | Transferase                           | NA                             | Aminotransferase Class I And II                                       | 0.908                    |
| 5QQY   | 938           | 2.3.1.37  | NA         | Transferase                           | NA                             | Aminotransferase Class I And II                                       | 0.911                    |
| 5QQZ   | 938           | 2.3.1.37  | NA         | Transferase                           | NA                             | Aminotransferase Class I And II                                       | 0.910                    |
| 5QR0   | 938           | 2.3.1.37  | NA         | Transferase                           | NA                             | Aminotransferase Class I And II                                       | 0.905                    |



| PDB ID | Residue count | EC number | SCOPE fold | Classification                    | CATH description | Protein Family Annotation                                    | Mean persistent similarity |
|--------|---------------|-----------|------------|-----------------------------------|------------------|--------------------------------------------------------------|----------------------------|
| 5QR1   | 938           | 2.3.1.37  | NA         | Transferase                       | NA               | Aminotransferase Class I And Ii                              | 0.909                      |
| 5QR2   | 938           | 2.3.1.37  | NA         | Transferase                       | NA               | Aminotransferase Class I And Ii                              | 0.907                      |
| 5QR3   | 938           | 2.3.1.37  | NA         | Transferase                       | NA               | Aminotransferase Class I And Ii                              | 0.908                      |
| 5QR4   | 938           | 2.3.1.37  | NA         | Transferase                       | NA               | Aminotransferase Class I And Ii                              | 0.910                      |
| 5QR5   | 938           | 2.3.1.37  | NA         | Transferase                       | NA               | Aminotransferase Class I And Ii                              | 0.910                      |
| 5QR6   | 938           | 2.3.1.37  | NA         | Transferase                       | NA               | Aminotransferase Class I And Ii                              | 0.907                      |
| 5QR7   | 938           | 2.3.1.37  | NA         | Transferase                       | NA               | Aminotransferase Class I And Ii                              | 0.909                      |
| 5QR8   | 938           | 2.3.1.37  | NA         | Transferase                       | NA               | Aminotransferase Class I And Ii                              | 0.913                      |
| 5QR9   | 938           | 2.3.1.37  | NA         | Transferase                       | NA               | Aminotransferase Class I And Ii                              | 0.909                      |
| 5QRA   | 938           | 2.3.1.37  | NA         | Transferase                       | NA               | Aminotransferase Class I And Ii                              | 0.909                      |
| 5QRB   | 938           | 2.3.1.37  | NA         | Transferase                       | NA               | Aminotransferase Class I And Ii                              | 0.910                      |
| 5QRC   | 938           | 2.3.1.37  | NA         | Transferase                       | NA               | Aminotransferase Class I And Ii                              | 0.910                      |
| 5QRD   | 938           | 2.3.1.37  | NA         | Transferase                       | NA               | Aminotransferase Class I And Ii                              | 0.900                      |
| 5QRE   | 938           | 2.3.1.37  | NA         | Transferase                       | NA               | Aminotransferase Class I And Ii                              | 0.908                      |
| 5QT3   | 938           | 2.3.1.37  | NA         | Transferase                       | NA               | Aminotransferase Class I And Ii                              | 0.910                      |
| 5SW8   | 1375          | 2.7.1.153 | NA         | Transferase/Transferase Inhibitor | NA               | Pi3-Kinase Family. Ras-Binding Domain                        | 0.905                      |
| 5SXF   | 1375          | 2.7.1.153 | NA         | Transferase/Transferase Inhibitor | NA               | Phosphoinositide 3-Kinase C2                                 | 0.912                      |
| 5VA9   | 1032          | 3.2.1.1   | NA         | Hydrolase/Hydrolase Inhibitor     | NA               | Alpha Amylase. Catalytic Domain                              | 0.908                      |
| 5VBN   | 1344          | 2.7.7.7   | NA         | Transferase                       | NA               | Dna Polymerase Alpha/Epsilon Subunit B                       | 0.923                      |
| 5VK0   | 1188          | 2.3.2.27  | NA         | Ligase/Ligase Inhibitor           | NA               | Swi1/Mdm2 Domain                                             | 0.900                      |
| 5VL7   | 1142          | 3.4.21.-  | NA         | Hydrolase                         | NA               | Peptidase Inhibitor I9                                       | 0.907                      |
| 5WDG   | 1158          | 2.2.1.6   | NA         | Transferase                       | NA               | Thiamine Pyrophosphate Enzyme. N-Terminal Tpp Binding Domain | 0.904                      |
| 5X3V   | 992           | 2.1.2.1   | NA         | Transferase                       | NA               | Serine Hydroxymethyltransferase                              | 0.900                      |
| 5YT3   | 1400          | NA        | NA         | Transferase                       | NA               | Protein Kinase Domain                                        | 0.916                      |
| 6B2N   | 1052          | 3.5.2.6   | NA         | Hydrolase                         | NA               | Beta-Lactamase Enzyme Family                                 | 0.904                      |
| 6B5J   | 1244          | 2.7.11.1  | NA         | Transferase/Transferase Inhibitor | NA               | Protein Tyrosine Kinase                                      | 0.911                      |
| 6CD6   | 1160          | 2.7.11.17 | NA         | Transferase/Transferase Inhibitor | NA               | Protein Kinase Domain                                        | 0.923                      |
| 6CQU   | 1084          | 3.1.1.7   | NA         | Hydrolase                         | NA               | Carboxylesterase Family                                      | 0.917                      |
| 6CQV   | 1084          | 3.1.1.7   | NA         | Hydrolase                         | NA               | Carboxylesterase Family                                      | 0.918                      |
| 6CQW   | 1084          | 3.1.1.7   | NA         | Hydrolase                         | NA               | Carboxylesterase Family                                      | 0.911                      |
| 6CQX   | 1084          | 3.1.1.7   | NA         | Hydrolase                         | NA               | Carboxylesterase Family                                      | 0.926                      |
| 6CQY   | 1084          | 3.1.1.7   | NA         | Hydrolase                         | NA               | Carboxylesterase Family                                      | 0.906                      |
| 6CQZ   | 1084          | 3.1.1.7   | NA         | Hydrolase                         | NA               | Carboxylesterase Family                                      | 0.907                      |
| 6DF6   | 1120          | NA        | NA         | Nuclear Protein                   | NA               | Ligand-Binding Domain Of Nuclear Hormone Receptor            | 0.915                      |
| 6E09   | 872           | 3.4.21.37 | NA         | Hydrolase/Hydrolase Inhibitor     | NA               | Trypsin                                                      | 0.904                      |
| 6EMI   | 1064          | 3.1.1.8   | NA         | Hydrolase                         | NA               | Carboxylesterase Family                                      | 0.915                      |
| 6ESJ   | 1058          | 3.1.1.8   | NA         | Hydrolase                         | NA               | Carboxylesterase Family                                      | 0.912                      |
| 6ESY   | 1058          | 3.1.1.8   | NA         | Hydrolase                         | NA               | Carboxylesterase Family                                      | 0.925                      |
| 6EZ2   | 1054          | 3.1.1.8   | NA         | Hydrolase                         | NA               | Carboxylesterase Family                                      | 0.921                      |
| 6F25   | 1078          | 3.1.1.7   | NA         | Hydrolase                         | NA               | Carboxylesterase Family                                      | 0.916                      |
| 6F7Q   | 1058          | 3.1.1.8   | NA         | Hydrolase                         | NA               | Carboxylesterase Family                                      | 0.924                      |
| 6F9V   | 1258          | 3.2.1.-   | NA         | Hydrolase                         | NA               | Angiotensin-Converting Enzyme                                | 0.910                      |
| 6FVZ   | 1040          | 1.4.3.4   | NA         | Flavoprotein                      | NA               | Flavin Containing Amine Oxidoreductase                       | 0.917                      |
| 6FW0   | 1040          | 1.4.3.4   | NA         | Flavoprotein                      | NA               | Flavin Containing Amine Oxidoreductase                       | 0.913                      |
| 6FWC   | 1040          | 1.4.3.4   | NA         | Flavoprotein                      | NA               | Flavin Containing Amine Oxidoreductase                       | 0.912                      |
| 6GQ3   | 1122          | 6.3.5.4   | NA         | Biosynthetic Protein              | NA               | Asparagine Synthase                                          | 0.927                      |
| 6GUB   | 1140          | 2.7.11.22 | NA         | Cell Cycle                        | NA               | Protein Kinase Domain                                        | 0.910                      |
| 6GUC   | 1140          | 2.7.11.22 | NA         | Cell Cycle                        | NA               | Protein Kinase Domain                                        | 0.922                      |
| 6GUE   | 1140          | 2.7.11.22 | NA         | Cell Cycle                        | NA               | Protein Kinase Domain                                        | 0.923                      |
| 6GUF   | 1140          | 2.7.11.22 | NA         | Cell Cycle                        | NA               | Protein Kinase Domain                                        | 0.913                      |
| 6H5X   | 1258          | 3.2.1.-   | NA         | Hydrolase                         | NA               | Angiotensin-Converting Enzyme                                | 0.901                      |
| 6HRH   | 938           | 2.3.1.37  | NA         | Oxidoreductase                    | NA               | Aminotransferase Class I And Ii                              | 0.911                      |
| 6HXF   | 1208          | 2.7.11.1  | NA         | Transferase                       | NA               | Protein Kinase Domain                                        | 0.943                      |
| 6ILZ   | 1380          | 2.7.11.13 | NA         | Transferase                       | NA               | Protein Kinase Domain                                        | 0.910                      |
| 6MBW   | 1144          | NA        | NA         | Transcription Activator           | NA               | Stat Protein. All-Alpha Domain                               | 0.908                      |
| 6MOZ   | 994           | 3.2.1.45  | NA         | Hydrolase                         | NA               | Glycosyl Hydrolase Family 30 Tim-Barrel Domain               | 0.922                      |
| 6NBL   | 1054          | 1.14.15.1 | NA         | Oxidoreductase                    | NA               | Cytochrome P450                                              | 0.907                      |
| 6O50   | 1100          | 3.1.1.7   | NA         | Hydrolase                         | NA               | Carboxylesterase Family                                      | 0.902                      |
| 6O52   | 1100          | 3.1.1.7   | NA         | Hydrolase                         | NA               | Carboxylesterase Family                                      | 0.910                      |
| 6O5R   | 1100          | 3.1.1.7   | NA         | Hydrolase                         | NA               | Carboxylesterase Family                                      | 0.908                      |
| 6O5S   | 1100          | 3.1.1.7   | NA         | Hydrolase                         | NA               | Carboxylesterase Family                                      | 0.910                      |
| 6P3W   | 1124          | 2.7.11.22 | NA         | Cell Cycle                        | NA               | Protein Kinase Domain                                        | 0.901                      |
| 6Q6K   | 994           | 3.2.1.45  | NA         | Hydrolase                         | NA               | Glycosyl Hydrolase Family 30 Beta Sandwich Domain            | 0.918                      |
| 6Q6L   | 994           | 3.2.1.45  | NA         | Hydrolase                         | NA               | Glycosyl Hydrolase Family 30 Tim-Barrel Domain               | 0.915                      |
| 6Q6N   | 994           | 3.2.1.45  | NA         | Hydrolase                         | NA               | Glycosyl Hydrolase Family 30 Tim-Barrel Domain               | 0.914                      |
| 6QVL   | 1008          | 2.1.2.1   | NA         | Transferase                       | NA               | Serine Hydroxymethyltransferase                              | 0.903                      |
| 6S1F   | 1268          | 2.7.11.1  | NA         | Signaling Protein                 | NA               | Protein Tyrosine Kinase                                      | 0.907                      |
| 6S8L   | 1058          | NA        | NA         | Structural Protein                | NA               | Tubulin/Ftsz Family. Gtpase Domain                           | 0.913                      |
| 6T6D   | 1204          | 2.7.11.30 | NA         | Signaling Protein                 | NA               | Protein Tyrosine Kinase                                      | 0.908                      |

Supplementary Table 3: Proteins targeted by Drugbank FDA-approved medications showing average persistent similarity measures higher than 0.9 with 6M71.

| Drug name           | Drug ID | DS1 PC         | DS2 PC         | DS3 PC         | Autodock LE | Autodock cluster |
|---------------------|---------|----------------|----------------|----------------|-------------|------------------|
| Danazol             | DB01406 | NA             | NA             | NA             | -8.31       | 149              |
| Bazedoxifene        | DB06401 | -0.0215722028  | -0.02560255855 | -0.01968259763 | -8.3        | 132              |
| Trilostane          | DB01108 | NA             | NA             | NA             | -8.28       | 150              |
| Estradiol benzoate  | DB13953 | NA             | NA             | NA             | -8.26       | 79               |
| Alpelisib           | DB12015 | -0.02748757587 | -0.03637858041 | -0.02711652859 | -8.04       | 136              |
| Norgestimate        | DB00957 | NA             | NA             | NA             | -7.78       | 82               |
| Meloxicam           | DB00814 | NA             | NA             | NA             | -7.77       | 111              |
| Etonogestrel        | DB00294 | NA             | NA             | NA             | -7.57       | 51               |
| Tibolone            | DB09070 | NA             | NA             | NA             | -7.56       | 128              |
| Regorafenib         | DB08896 | -0.02240332949 | -0.03581579405 | -0.02348317089 | -7.5        | 47               |
| Estradiol acetate   | DB13952 | NA             | NA             | NA             | -7.45       | 123              |
| Lornoxicam          | DB06725 | NA             | NA             | NA             | -7.43       | 122              |
| Tenoxicam           | DB00469 | NA             | NA             | NA             | -7.38       | 87               |
| Sorafenib           | DB00398 | -0.1139503326  | -0.1488412632  | -0.0528631983  | -7.34       | 18               |
| Parecoxib           | DB08439 | -0.02956392566 | -0.09595335133 | -0.04444581116 | -7.33       | 8                |
| Norethynodrel       | DB09371 | NA             | NA             | NA             | -7.32       | 150              |
| Acemetacin          | DB13783 | -0.04903803014 | -0.03113981002 | -0.0295586911  | -7.32       | 15               |
| Piroxicam           | DB00554 | NA             | NA             | NA             | -7.31       | 79               |
| Pyridoxal phosphate | DB00114 | NA             | NA             | NA             | -7.25       | 18               |
| Sulindac            | DB00605 | -0.06768358761 | -0.1193287796  | -0.06631246593 | -7.23       | 32               |
| Gestrinone          | DB11619 | -0.02317537043 | -0.0289833741  | -0.01718246109 | -7.22       | 81               |
| Levonorgestrel      | DB00367 | -0.08286521718 | -0.1387530571  | -0.07915695554 | -7.21       | 89               |
| Zofenopril          | DB13166 | -0.02675101496 | -0.028950874   | -0.02815095671 | -7.15       | 3                |
| Prasterone          | DB01708 | NA             | NA             | NA             | -7.13       | 129              |
| Naloxone            | DB01183 | -0.05572216872 | -0.1159793987  | -0.08947993744 | -7.08       | 1                |
| Raloxifene          | DB00481 | -0.1278104657  | -0.1700041351  | -0.0726603481  | -7.05       | 1                |
| Phenolphthalein     | DB04824 | -0.1299268982  | -0.09894230167 | -0.03725859228 | -6.99       | 46               |

| Drug name        | Drug ID | DS1 PC         | DS2 PC         | DS3 PC         | Autodock LE | Autodock cluster |
|------------------|---------|----------------|----------------|----------------|-------------|------------------|
| Carprofen        | DB00821 | -0.07383721985 | -0.08740776905 | -0.06570999705 | -6.97       | 106              |
| Cocarboxylase    | DB01987 | NA             | NA             | NA             | -6.88       | 8                |
| Lasofloxifene    | DB06202 | NA             | NA             | NA             | -6.84       | 9                |
| Hexachlorophene  | DB00756 | -0.1205069314  | -0.02762659079 | -0.021927507   | -6.83       | 69               |
| Benazepril       | DB00542 | NA             | NA             | NA             | -6.8        | 7                |
| Etoricoxib       | DB01628 | -0.04561993738 | -0.09469646296 | -0.02849270576 | -6.8        | 25               |
| Indomethacin     | DB00328 | -0.06872835755 | -0.1234924169  | -0.05359016853 | -6.73       | 19               |
| Homosalate       | DB11064 | NA             | NA             | NA             | -6.68       | 8                |
| Mitotane         | DB00648 | -0.07788038982 | -0.1279216274  | -0.0534352127  | -6.64       | 37               |
| Proguanil        | DB01131 | -0.05906985523 | -0.0986410706  | -0.06488844299 | -6.64       | 41               |
| Imatinib         | DB00619 | -0.1275296881  | -0.1406454315  | -0.05471119522 | -6.61       | 10               |
| Valdecoxib       | DB00580 | -0.1174180274  | -0.139154822   | -0.05737104159 | -6.57       | 131              |
| Baricitinib      | DB11817 | -0.02509236501 | -0.03395915629 | -0.02316989406 | -6.57       | 21               |
| Benzylpenicillin | DB01053 | -0.05151804782 | -0.1205224642  | -0.04497655044 | -6.54       | 46               |
| Ruxolitinib      | DB08877 | -0.103105195   | -0.1131754173  | -0.08494928103 | -6.49       | 38               |
| Rofecoxib        | DB00533 | -0.06532970378 | -0.1390964269  | -0.06670270062 | -6.48       | 63               |
| Netarsudil       | DB13931 | NA             | NA             | NA             | -6.46       | 12               |
| Zonisamide       | DB00909 | NA             | NA             | NA             | -6.45       | 16               |
| Pomalidomide     | DB08910 | -0.01624233519 | -0.02789451725 | -0.02620193498 | -6.45       | 54               |
| Arzoxifene       | DB06249 | NA             | NA             | NA             | -6.41       | 2                |
| Lenalidomide     | DB00480 | -0.06385406488 | -0.1404006454  | -0.08674137477 | -6.4        | 25               |
| Vandetanib       | DB05294 | -0.02622700096 | -0.0392738498  | -0.02858052382 | -6.39       | 64               |
| Camphor          | DB01744 | NA             | NA             | NA             | -6.35       | 73               |
| Donepezil        | DB00843 | -0.07815528694 | -0.08555866665 | -0.04839647863 | -6.33       | 42               |
| Lenvatinib       | DB09078 | -0.02085713306 | -0.03670757124 | -0.03819902793 | -6.33       | 32               |
| Galantamine      | DB00674 | -0.04982630031 | -0.1281839865  | -0.06054166546 | -6.32       | 56               |
| Thalidomide      | DB01041 | -0.08657364237 | -0.1593972746  | -0.08730739799 | -6.27       | 15               |

| Drug name                 | Drug ID | DS1 PC         | DS2 PC         | DS3 PC         | Autodock LE | Autodock cluster |
|---------------------------|---------|----------------|----------------|----------------|-------------|------------------|
| <b>Oxaprozin</b>          | DB00991 | -0.0783222472  | -0.1521492916  | -0.09516869794 | -6.24       | 70               |
| <b>Desipramine</b>        | DB01151 | -0.0626465238  | -0.1244359823  | -0.06518023426 | -6.2        | 49               |
| <b>Pioglitazone</b>       | DB01132 | -0.08437085738 | -0.1610229985  | -0.08492279365 | -6.19       | 16               |
| <b>Permethrin</b>         | DB04930 | NA             | NA             | NA             | -6.19       | 12               |
| <b>Meclofenamic acid</b>  | DB00939 | -0.0711683043  | -0.1137762251  | -0.07724600644 | -6.03       | 23               |
| <b>Dasatinib</b>          | DB01254 | -0.03959075682 | -0.1464677954  | -0.09185735897 | -6.03       | 18               |
| <b>Chlorpromazine</b>     | DB00477 | -0.09631391962 | -0.1572395409  | -0.06452754988 | -6.02       | 84               |
| <b>Etodolac</b>           | DB00749 | -0.03718207416 | -0.1263476927  | -0.08220971901 | -6.01       | 23               |
| <b>Bendazac</b>           | DB13501 | NA             | NA             | NA             | -5.88       | 27               |
| <b>Nomifensine</b>        | DB04821 | -0.03876006779 | -0.1043832671  | -0.08165269248 | -5.87       | 130              |
| <b>Cefprozil</b>          | DB01150 | NA             | NA             | NA             | -5.83       | 31               |
| <b>Enzacamene</b>         | DB11219 | NA             | NA             | NA             | -5.82       | 118              |
| <b>Dobutamine</b>         | DB00841 | -0.08435685642 | -0.1260907777  | -0.06239967631 | -5.81       | 16               |
| <b>Isocarboxazid</b>      | DB01247 | -0.04975326092 | -0.1163862569  | -0.06504677419 | -5.81       | 9                |
| <b>Diclofenac</b>         | DB00586 | -0.06267402209 | -0.1425241791  | -0.08212780643 | -5.8        | 67               |
| <b>Celecoxib</b>          | DB00482 | -0.09092385036 | -0.1448463125  | -0.07540573835 | -5.78       | 12               |
| <b>Phenylbutazone</b>     | DB00812 | -0.03669629969 | -0.2123980944  | -0.09277102578 | -5.78       | 25               |
| <b>Ketamine</b>           | DB01221 | NA             | NA             | NA             | -5.75       | 86               |
| <b>Spirapril</b>          | DB01348 | NA             | NA             | NA             | -5.69       | 2                |
| <b>Ketorolac</b>          | DB00465 | -0.06601382618 | -0.1489144421  | -0.07699282352 | -5.68       | 92               |
| <b>Minaprine</b>          | DB00805 | -0.02485426552 | -0.1302259838  | -0.07751564536 | -5.68       | 27               |
| <b>Zimelidine</b>         | DB04832 | NA             | NA             | NA             | -5.67       | 24               |
| <b>Bromfenac</b>          | DB00963 | -0.03038903046 | -0.07734959514 | -0.06200072483 | -5.66       | 7                |
| <b>Physostigmine</b>      | DB00981 | -0.05175476108 | -0.1478856324  | -0.07026511377 | -5.66       | 19               |
| <b>Ramipril</b>           | DB00178 | -0.07548091718 | -0.1278868792  | -0.07810335242 | -5.64       | 6                |
| <b>Sulfasalazine</b>      | DB00795 | NA             | NA             | NA             | -5.64       | 25               |
| <b>Tiaprofenic acid</b>   | DB01600 | -0.04855219047 | -0.05210586323 | -0.07681435882 | -5.64       | 34               |
| <b>Menthyl salicylate</b> | DB11201 | NA             | NA             | NA             | -5.61       | 30               |
| <b>Nimesulide</b>         | DB04743 | -0.05493930538 | -0.1138073474  | -0.06126457811 | -5.59       | 6                |
| <b>Metyrapone</b>         | DB01011 | -0.03354450516 | -0.1500441948  | -0.08878627781 | -5.58       | 10               |
| <b>Afatinib</b>           | DB08916 | -0.05469023142 | -0.1569087453  | -0.0476744751  | -5.58       | 5                |
| <b>Tofacitinib</b>        | DB08895 | -0.03848190173 | -0.09969335877 | -0.08081765762 | -5.54       | 30               |

| Drug name          | Drug ID | DS1 PC         | DS2 PC         | DS3 PC         | Autodock LE | Autodock cluster |
|--------------------|---------|----------------|----------------|----------------|-------------|------------------|
| Tolmetin           | DB00500 | -0.0828485655  | -0.1572255765  | -0.07010605108 | -5.53       | 11               |
| Loxoprofen         | DB09212 | -0.05426943458 | -0.1141684645  | -0.05005096196 | -5.46       | 102              |
| Menadione          | DB00170 | -0.1453822115  | -0.1355622276  | -0.07575705865 | -5.45       | 28               |
| Lumiracoxib        | DB01283 | NA             | NA             | NA             | -5.45       | 35               |
| Dexketoprofen      | DB09214 | NA             | NA             | NA             | -5.45       | 2                |
| Ketoprofen         | DB01009 | -0.06965267839 | -0.1522945923  | -0.0876240037  | -5.44       | 13               |
| Enalapril          | DB00584 | NA             | NA             | NA             | -5.43       | 3                |
| Naproxen           | DB00788 | -0.02031065294 | -0.05251558703 | -0.06314355619 | -5.43       | 21               |
| Gemcitabine        | DB00441 | -0.1197856961  | -0.144233304   | -0.05538734049 | -5.41       | 5                |
| Flurbiprofen       | DB00712 | -0.04757602254 | -0.04423595102 | -0.06243437665 | -5.39       | 144              |
| Rasagiline         | DB01367 | -0.01971289372 | -0.03802722786 | -0.01953619295 | -5.36       | 1                |
| Enalaprilat        | DB09477 | -0.06440736764 | -0.0891707389  | -0.07534522909 | -5.36       | 1                |
| Nepafenac          | DB06802 | -0.01789915777 | -0.03172058721 | -0.02354260654 | -5.32       | 15               |
| Suprofen           | DB00870 | -0.01875661461 | -0.03681705366 | -0.01692008136 | -5.31       | 44               |
| Cilazapril         | DB01340 | NA             | NA             | NA             | -5.31       | 2                |
| Dipyrrithione      | DB11327 | NA             | NA             | NA             | -5.24       | 19               |
| Tacrine            | DB00382 | -0.09287031672 | -0.08302414823 | -0.06630365667 | -5.21       | 1                |
| Ranitidine         | DB00863 | -0.06662630567 | -0.1474593113  | -0.05935072968 | -5.21       | 11               |
| Aceclofenac        | DB06736 | -0.03724291835 | -0.04663686721 | 0.003666648941 | -5.2        | 1                |
| Tolfenamic acid    | DB09216 | -0.03298036562 | -0.03208419733 | -0.02504916606 | -5.19       | 79               |
| Cefdinir           | DB00535 | -0.0258255418  | -0.02941001403 | -0.02565040918 | -5.17       | 11               |
| Erlotinib          | DB00530 | -0.09381046692 | -0.1442473956  | -0.07040092013 | -5.16       | 8                |
| Cladribine         | DB00242 | -0.1176725341  | -0.1384668748  | -0.0553976742  | -5.15       | 9                |
| Lindane            | DB00431 | NA             | NA             | NA             | -5.13       | 117              |
| Melatonin          | DB01065 | -0.05332669635 | -0.1452299399  | -0.08659236386 | -5.13       | 33               |
| Proflavine         | DB01123 | NA             | NA             | NA             | -5.13       | 53               |
| Mefenamic acid     | DB00784 | -0.08053264085 | -0.1610880628  | -0.09040675467 | -5.11       | 78               |
| Nialamide          | DB04820 | -0.04823406067 | -0.1353793456  | -0.06789379013 | -5.08       | 23               |
| Diflunisal         | DB00861 | -0.05325602118 | -0.1474645017  | -0.04859592628 | -5.06       | 149              |
| Balsalazide        | DB01014 | NA             | NA             | NA             | -5.06       | 2                |
| Diethylstilbestrol | DB00255 | NA             | NA             | NA             | -5.05       | 3                |
| Raltitrexed        | DB00293 | -0.08206102395 | -0.1586436186  | -0.08207151651 | -5.05       | 3                |
| Capecitabine       | DB01101 | -0.04501451453 | -0.1586436186  | -0.06742698378 | -5.05       | 48               |

| Drug name         | Drug ID | DS1 PC          | DS2 PC         | DS3 PC         | Autodock LE | Autodock cluster |
|-------------------|---------|-----------------|----------------|----------------|-------------|------------------|
| Nabumetone        | DB00461 | -0.03081962528  | -0.1586436186  | -0.07669459855 | -5.03       | 64               |
| Fenoprofen        | DB00573 | NA              | NA             | NA             | -5.02       | 4                |
| Dienestrol        | DB00890 | -0.0602286817   | -0.1899624664  | -0.07632484338 | -5.02       | 5                |
| Moclobemide       | DB01171 | -0.08176735304  | -0.1085182704  | -0.04853535362 | -5.02       | 3                |
| Trifluridine      | DB00432 | -0.05545399283  | -0.1136605124  | -0.0562147341  | -4.99       | 9                |
| Floxuridine       | DB00322 | -0.09416751706  | -0.08941499712 | -0.03464425628 | -4.98       | 11               |
| Fluorouracil      | DB00544 | -0.07334066692  | -0.1090989338  | -0.07021383781 | -4.98       | 102              |
| Salsalate         | DB01399 | -0.02229614783  | -0.03075313934 | -0.02406440909 | -4.98       | 64               |
| Chloramphenicol   | DB00446 | -0.004486549446 | -0.08476272265 | -0.03044854044 | -4.9        | 12               |
| Dacomitinib       | DB11963 | -0.03310816615  | -0.03038494182 | -0.02443712107 | -4.89       | 12               |
| Tegafur           | DB09256 | NA              | NA             | NA             | -4.83       | 85               |
| Pyrimethamine     | DB00205 | -0.07835576333  | -0.1466342633  | -0.07482209246 | -4.81       | 27               |
| Isoprenaline      | DB01064 | NA              | NA             | NA             | -4.81       | 1                |
| Oxybenzone        | DB01428 | -0.05085103307  | -0.1425623805  | -0.08471895184 | -4.79       | 5                |
| Vorinostat        | DB02546 | -0.1589620803   | -0.1799903936  | -0.09706307605 | -4.79       | 44               |
| Trandolapril      | DB00519 | NA              | NA             | NA             | -4.77       | 2                |
| Osimertinib       | DB09330 | -0.02506710417  | -0.04465094636 | -0.03109529258 | -4.76       | 3                |
| Flufenamic acid   | DB02266 | -0.03794344247  | -0.1482318394  | -0.0330936669  | -4.68       | 45               |
| Neostigmine       | DB01400 | -0.05841227851  | -0.1346627898  | -0.05182911851 | -4.67       | 46               |
| Phenyl salicylate | DB11071 | NA              | NA             | NA             | -4.65       | 11               |
| Mesalazine        | DB00244 | NA              | NA             | NA             | -4.64       | 5                |
| Tegafur-uracil    | DB09327 | NA              | NA             | NA             | -4.64       | 94               |
| Calcium Phosphate | DB11348 | NA              | NA             | NA             | -4.63       | 16               |
| Phenol            | DB03255 | NA              | NA             | NA             | -4.61       | 149              |
| Acetaminophen     | DB00316 | -0.0407834655   | -0.1210933814  | -0.04252458414 | -4.58       | 6                |
| Ibuprofen         | DB01050 | -0.06653703289  | -0.1530301568  | -0.06000440304 | -4.57       | 14               |
| Antipyrine        | DB01435 | -0.06423609069  | -0.163852781   | -0.09369368933 | -4.57       | 2                |
| Resveratrol       | DB02709 | -0.07453453575  | -0.1569588619  | -0.08585819831 | -4.54       | 5                |
| Dexibuprofen      | DB09213 | -0.04237383773  | -0.1315091813  | -0.05557828985 | -4.54       | 13               |

| Drug name            | Drug ID | DS1 PC         | DS2 PC         | DS3 PC         | Autodock LE | Autodock cluster |
|----------------------|---------|----------------|----------------|----------------|-------------|------------------|
| Aminosalicylic acid  | DB00233 | -0.02288280655 | -0.1064705647  | -0.04682085856 | -4.5        | 19               |
| Alclofenac           | DB13167 | NA             | NA             | NA             | -4.5        | 83               |
| Caffeine             | DB00201 | -0.07396416979 | -0.1449457802  | -0.08165567669 | -4.49       | 147              |
| Lidocaine            | DB00281 | -0.0528568396  | -0.12199959    | -0.07073725187 | -4.49       | 25               |
| Quinapril            | DB00881 | NA             | NA             | NA             | -4.49       | 1                |
| Salicylic acid       | DB00936 | NA             | NA             | NA             | -4.49       | 43               |
| Timolol              | DB00373 | -0.06960236247 | -0.1682405832  | -0.08729867794 | -4.47       | 1                |
| Safinamide           | DB06654 | -0.02830858562 | -0.03012863409 | -0.02532369029 | -4.46       | 20               |
| Gefitinib            | DB00317 | -0.07722806756 | -0.1528584167  | -0.08818786305 | -4.42       | 5                |
| Amlodipine           | DB00381 | -0.09589179185 | -0.1279609055  | -0.05497065618 | -4.4        | 4                |
| Sulfadoxine          | DB01299 | -0.0164610665  | -0.07173518613 | -0.07017371301 | -4.4        | 7                |
| Tranlycypromine      | DB00752 | NA             | NA             | NA             | -4.38       | 141              |
| Captopril            | DB01197 | -0.07362021    | -0.1151497512  | -0.07366461938 | -4.37       | 37               |
| Edrophonium          | DB01010 | -0.05870860654 | -0.07766297865 | -0.04997515091 | -4.3        | 4                |
| Metamfetamine        | DB01577 | NA             | NA             | NA             | -4.29       | 3                |
| Acetohydroxamic acid | DB00551 | NA             | NA             | NA             | -4.24       | 50               |
| Erdafitinib          | DB12147 | NA             | NA             | NA             | -4.23       | 3                |
| Pralidoxime          | DB00733 | NA             | NA             | NA             | -4.21       | 11               |
| Selegiline           | DB01037 | NA             | NA             | NA             | -4.19       | 1                |
| Pidolic acid         | DB03088 | NA             | NA             | NA             | -4.17       | 109              |
| Phentermine          | DB00191 | -0.05959242774 | -0.1754224209  | -0.0609105017  | -4.11       | 2                |
| Eugenol              | DB09086 | -0.06666871845 | -0.09662148661 | -0.05256826742 | -4.09       | 33               |

| Drug name                   | Drug id | DS1 PC         | DS2 PC         | DS3 PC         | Autodock LE | Autodock cluster |
|-----------------------------|---------|----------------|----------------|----------------|-------------|------------------|
| Perindopril                 | DB00790 | -0.04672058301 | -0.1156423864  | -0.08355714744 | -3.94       | 3                |
| Amphetamine                 | DB00182 | NA             | NA             | NA             | -3.91       | 115              |
| Pyridostigmine              | DB00545 | -0.01605146411 | -0.1446496333  | -0.07263672947 | -3.91       | 23               |
| Ephedrine                   | DB01364 | NA             | NA             | NA             | -3.9        | 108              |
| Rivastigmine                | DB00989 | -0.04118877114 | -0.08288883411 | -0.01291249181 | -3.87       | 4                |
| Bufexamac                   | DB13346 | -0.03237086481 | -0.03754711732 | -0.02197067876 | -3.85       | 18               |
| Miglitol                    | DB00491 | -0.08052162269 | -0.167591787   | -0.06218658938 | -3.81       | 1                |
| Acetylsalicylic acid        | DB00945 | -0.03307493015 | -0.1012026588  | -0.07444387473 | -3.79       | 113              |
| Glycol salicylate           | DB11323 | NA             | NA             | NA             | -3.71       | 13               |
| Trimethoprim                | DB00440 | -0.02305001067 | -0.02936002336 | -0.05608023011 | -3.68       | 16               |
| Choline                     | DB00122 | NA             | NA             | NA             | -3.62       | 50               |
| Pargyline                   | DB01626 | -0.05079848604 | -0.09896463587 | -0.05224864791 | -3.5        | 17               |
| Carbamoylcholine            | DB00411 | NA             | NA             | NA             | -3.44       | 97               |
| Acetylcholine               | DB03128 | -0.04267333997 | -0.09419844744 | -0.07222182479 | -3.44       | 117              |
| Isoflurophate               | DB00677 | NA             | NA             | NA             | -3.41       | 4                |
| Phenelzine                  | DB00780 | -0.07217048468 | -0.08791322702 | -0.07068957721 | -3.4        | 105              |
| Guanidine                   | DB00536 | NA             | NA             | NA             | -3.35       | 92               |
| Aspartic acid               | DB00128 | NA             | NA             | NA             | -3.32       | 4                |
| Cysteine                    | DB00151 | NA             | NA             | NA             | -3.3        | 96               |
| Choline salicylate          | DB14006 | NA             | NA             | NA             | -3.3        | 58               |
| Glycerin                    | DB09462 | NA             | NA             | NA             | -3.24       | 5                |
| Asparagine                  | DB00174 | NA             | NA             | NA             | -3.2        | 4                |
| Levocarnitine               | DB00583 | NA             | NA             | NA             | -3.17       | 4                |
| Propanoic acid              | DB03766 | NA             | NA             | NA             | -3.17       | 150              |
| Citric acid                 | DB04272 | NA             | NA             | NA             | -3.07       | 59               |
| Echothiophate               | DB01057 | NA             | NA             | NA             | -2.95       | 18               |
| Glycine                     | DB00145 | NA             | NA             | NA             | -2.77       | 6                |
| Glutamic acid               | DB00142 | NA             | NA             | NA             | -2.75       | 11               |
| Calcium phosphate dihydrate | DB14481 | NA             | NA             | NA             | -2          | 150              |
| Trolamine salicylate        | DB11079 | NA             | NA             | NA             | -1.97       | 1                |
| Zinc acetate                | DB14487 | NA             | NA             | NA             | -1.07       | 150              |

Supplementary Table 4: Transcriptomic and molecular docking analyses results for drugs with the potential of targeting the SARS-CoV-2 RNA dependent RNA polymerase (6M71).



| PDB ID | Residue count | EC number | SCOPE fold                        | Classification                          | CATH description | Protein Family Annotation                               | Mean persistent similarity |
|--------|---------------|-----------|-----------------------------------|-----------------------------------------|------------------|---------------------------------------------------------|----------------------------|
| 1I8L   | 668           | NA        | Immunoglobulin-Like Beta-Sandwich | Immune System                           | Immunoglobulins  | Immunoglobulin V-Set Domain                             | 0.900                      |
| 1PYW   | 621           | NA        | Immunoglobulin-Like Beta-Sandwich | Immune System/Protein Binding/Toxin     | Immunoglobulins  | Immunoglobulin C1-Set Domain                            | 0.904                      |
| 4MVL   | 912           | NA        | NA                                | Protein Binding/Protein Fibril          | NA               | Lipocalin / Cytosolic Fatty-Acid Binding Protein Family | 0.911                      |
| 4QFD   | 694           | 1.4.3.3   | NA                                | Oxidoreductase/Oxidoreductase Inhibitor | NA               | Fad Dependent Oxidoreductase                            | 0.904                      |
| 4S0T   | 870           | NA        | NA                                | Transcription                           | NA               | Ligand-Binding Domain Of Nuclear Hormone Receptor       | 0.909                      |
| 5CS6   | 704           | 2.7.11.1  | NA                                | Transferase                             | NA               | Protein Kinase Domain                                   | 0.902                      |
| 5KPN   | 704           | 2.4.2.30  | NA                                | Transferase/Transferase Inhibitor       | NA               | Poly(Adp-Ribose) Polymerase Catalytic Domain            | 0.900                      |
| 5KPP   | 700           | 2.4.2.30  | NA                                | Transferase/Transferase Inhibitor       | NA               | Poly(Adp-Ribose) Polymerase Catalytic Domain            | 0.901                      |
| 5KPQ   | 700           | 2.4.2.30  | NA                                | Transferase/Transferase Inhibitor       | NA               | Poly(Adp-Ribose) Polymerase Catalytic Domain            | 0.902                      |
| 5OTP   | 704           | 2.7.11.1  | NA                                | Transferase                             | NA               | Protein Kinase Domain                                   | 0.901                      |
| 5WS0   | 704           | 2.4.2.30  | NA                                | Transferase/Transferase Inhibitor       | NA               | Poly(Adp-Ribose) Polymerase Catalytic Domain            | 0.901                      |
| 5WTC   | 704           | 2.4.2.30  | NA                                | Transferase/Transferase Inhibitor       | NA               | Poly(Adp-Ribose) Polymerase Catalytic Domain            | 0.908                      |
| 6BC1   | 666           | NA        | NA                                | Signaling Protein                       | NA               | Ras Family                                              | 0.903                      |

Supplementary Table 5: Proteins targeted by Drugbank FDA-approved medications showing average persistent similarity measures higher than 0.9 with 6W01.

| Drug name           | Drug id | PC set 1(GSE150316) | PC set 2 (CRA002390) | PC set 3 (GSE147507) | Autodock LE (kcal/mol) | Autodock cluster |
|---------------------|---------|---------------------|----------------------|----------------------|------------------------|------------------|
| Estradiol benzoate  | DB13953 | NA                  | NA                   | NA                   | -11.56                 | 2                |
| Clotrimazole        | DB00257 | -0.09247459429      | -0.09417997645       | -0.04845518428       | -11.47                 | 12               |
| Dexamethasone       | DB01234 | -0.07176892746      | -0.1529509474        | -0.07847304485       | -11.42                 | 11               |
| Phenolphthalein     | DB04824 | -0.1299268982       | -0.09894230167       | -0.03725859228       | -11.15                 | 25               |
| Spironolactone      | DB00421 | -0.1200039446       | -0.1046496564        | -0.08907503297       | -10.99                 | 2                |
| Prasterone          | DB01708 | NA                  | NA                   | NA                   | -10.98                 | 40               |
| Pregnenolone        | DB02789 | -0.0611673301       | -0.09701467974       | -0.05776315121       | -10.77                 | 44               |
| Estradiol acetate   | DB13952 | NA                  | NA                   | NA                   | -10.61                 | 23               |
| Mifepristone        | DB00834 | -0.1336064601       | -0.1414272927        | -0.06288002847       | -10.04                 | 25               |
| Niraparib           | DB11793 | NA                  | NA                   | NA                   | -9.85                  | 36               |
| Carbamazepine       | DB00564 | -0.08046486733      | -0.1427960558        | -0.07447221905       | -9.66                  | 32               |
| Rucaparib           | DB12332 | -0.06746929306      | -0.1769352724        | -0.08890911592       | -9.53                  | 28               |
| Sulfinpyrazone      | DB01138 | -0.08049934697      | -0.1008229621        | -0.07343952772       | -9.5                   | 2                |
| Olaparib            | DB09074 | NA                  | NA                   | NA                   | -9.48                  | 1                |
| Rilpivirine         | DB08864 | -0.01779495312      | -0.03036612398       | -0.03165871921       | -9.31                  | 1                |
| Methylphenobarbital | DB00849 | NA                  | NA                   | NA                   | -9.28                  | 74               |
| Phenobarbital       | DB01174 | NA                  | NA                   | NA                   | -9.19                  | 112              |
| Triclosan           | DB08604 | -0.1338300494       | -0.0825734045        | -0.03948117551       | -9.13                  | 26               |
| Flutemetamol (18F)  | DB09151 | NA                  | NA                   | NA                   | -8.91                  | 129              |
| Clonazepam          | DB01068 | -0.01622828602      | -0.03401228995       | -0.0298152316        | -8.64                  | 6                |
| Phenytoin           | DB00252 | -0.03024144853      | -0.1181536543        | -0.08137144335       | -8.59                  | 18               |
| Erlotinib           | DB00530 | -0.09381046692      | -0.1442473956        | -0.07040092013       | -8.5                   | 1                |

| Drug name          | Drug id | PC set 1 (GSE150316) | PC set 2 (CRA002390) | PC set 3 (GSE147507) | Autodock LE (kcal/mol) | Autodock cluster |
|--------------------|---------|----------------------|----------------------|----------------------|------------------------|------------------|
| Mephentyoin        | DB00532 | -0.04907013636       | -0.07908497205       | -0.1006311735        | -8.36                  | 58               |
| Miconazole         | DB01110 | -0.1202302847        | -0.02711535835       | -0.02795302676       | -8.35                  | 4                |
| Permethrin         | DB04930 | NA                   | NA                   | NA                   | -8.26                  | 1                |
| Fenofibrate        | DB01039 | -0.06579908049       | -0.1497709694        | -0.06584586954       | -8.21                  | 16               |
| Pentobarbital      | DB00312 | -0.0488779023        | -0.04255962821       | -0.03422718896       | -8.08                  | 32               |
| Warfarin           | DB00682 | -0.05985786376       | -0.1881027925        | -0.07311862078       | -8.05                  | 1                |
| Lindane            | DB00431 | NA                   | NA                   | NA                   | -8                     | 19               |
| Resveratrol        | DB02709 | -0.07453453575       | -0.1569588619        | -0.08585819831       | -7.99                  | 9                |
| Econazole          | DB01127 | -0.04461210256       | -0.1396819043        | -0.06847544611       | -7.93                  | 6                |
| Ethotoin           | DB00754 | -0.02095545218       | -0.02810516847       | -0.05989308745       | -7.4                   | 42               |
| Talazoparib        | DB11760 | NA                   | NA                   | NA                   | -7.39                  | 22               |
| Bezafibrate        | DB01393 | -0.05022272695       | -0.1735191963        | -0.07664844941       | -7.23                  | 1                |
| Fenofibric acid    | DB13873 | NA                   | NA                   | NA                   | -7.17                  | 2                |
| Ifosfamide         | DB01181 | -0.04544867364       | -0.1517373733        | -0.06720973109       | -6.91                  | 2                |
| Theophylline       | DB00277 | -0.0674258857        | -0.1042658312        | -0.05348957409       | -6.72                  | 55               |
| Cyclophosphamide   | DB00531 | -0.04964264496       | -0.148458618         | -0.06910821362       | -6.34                  | 27               |
| Flutamide          | DB00499 | -0.06257285784       | -0.1291467547        | -0.08429414812       | -5.9                   | 15               |
| Nicotinamide       | DB02701 | -0.06537166631       | -0.1381641029        | -0.04894040471       | -5.76                  | 73               |
| Azathioprine       | DB00993 | -0.07268609978       | -0.1879651099        | -0.07933128967       | -5.31                  | 1                |
| Diethylstilbestrol | DB00255 | NA                   | NA                   | NA                   | -5                     | 8                |
| Dimercaprol        | DB06782 | NA                   | NA                   | NA                   | -4.05                  | 42               |
| Benzoic acid       | DB03793 | NA                   | NA                   | NA                   | -3.68                  | 137              |
| Nifedipine         | DB01115 | -0.06997637254       | -0.1589009534        | -0.07188197956       | -2.59                  | 12               |
| Aluminum acetate   | DB14518 | NA                   | NA                   | NA                   | -1.21                  | 86               |
| Zinc acetate       | DB14487 | NA                   | NA                   | NA                   | -1.01                  | 150              |

Supplementary Table 6: Transcriptomic and molecular docking analyses results for drugs with the potential of targeting the SARS-CoV-2 NSP15 Endoribonuclease (6W01).

| 3CL protease   |               |                                                                                    |          |                  |              |                      |                |                 |  |
|----------------|---------------|------------------------------------------------------------------------------------|----------|------------------|--------------|----------------------|----------------|-----------------|--|
| Candidate drug | ID            | Description                                                                        | Set size | Enrichment score | NES          | p-value              | p-adjust       | q-values        |  |
| Cholic acid    | R-HSA-168274  | Export of Viral Ribonucleoproteins from Nucleus                                    | 31       | 0.5504421479     | 2.164129742  | 4.44345700955343e-05 | 0.002159494061 | 0.00178604772   |  |
| Cholic acid    | R-HSA-168325  | Viral Messenger RNA Synthesis                                                      | 42       | 0.5068214292     | 2.156207981  | 4.97784857384638e-05 | 0.002159494061 | 0.00178604772   |  |
| Cholic acid    | R-HSA-192823  | Viral mRNA Translation                                                             | 85       | 0.47674678       | 2.356347972  | 7.38443361394181e-05 | 0.002159494061 | 0.00178604772   |  |
| Cholic acid    | R-HSA-168273  | Influenza Viral RNA Transcription and Replication                                  | 130      | 0.4924408244     | 2.618170517  | 0.0001063942973      | 0.002411836331 | 0.002019563883  |  |
| Cholic acid    | R-HSA-9662851 | Anti-inflammatory response favouring Leishmania parasite infection                 | 140      | -0.3902072615    | -1.65818373  | 0.0003200354501      | 0.00520987942  | 0.004308922829  |  |
| Cholic acid    | R-HSA-9660821 | ADORA2B mediated anti-inflammatory cytokines production                            | 108      | -0.4124621455    | -1.697201332 | 0.0003684692011      | 0.005862010017 | 0.004848278961  |  |
| Cholic acid    | R-HSA-1169410 | Antiviral mechanism by IFN-stimulated genes                                        | 77       | 0.3605928817     | 1.750131725  | 0.0007519824993      | 0.01052775499  | 0.008707165782  |  |
| Cholic acid    | R-HSA-1169408 | ISG15 antiviral mechanism                                                          | 69       | 0.3689047506     | 1.751465308  | 0.0008275510854      | 0.01135854431  | 0.009394284767  |  |
| Rutin          | R-HSA-168274  | Export of Viral Ribonucleoproteins from Nucleus                                    | 31       | 0.5569809409     | 2.514532143  | 7.24375226367258e-05 | 0.001857379768 | 0.001207995112  |  |
| Rutin          | R-HSA-168325  | Viral Messenger RNA Synthesis                                                      | 42       | 0.6257977832     | 3.063251562  | 8.99280575539568e-05 | 0.001857379768 | 0.001207995112  |  |
| Rutin          | R-HSA-5676590 | NIK ->noncanonical NF-kB signaling                                                 | 56       | 0.5028596279     | 2.646049886  | 0.0001159554731      | 0.001857379768 | 0.001207995112  |  |
| Rutin          | R-HSA-5607761 | Dectin-1 mediated noncanonical NF-kB signaling                                     | 57       | 0.5115624867     | 2.705496875  | 0.0001178550383      | 0.001857379768 | 0.001207995112  |  |
| Rutin          | R-HSA-1169091 | Activation of NF-kappaB in B cells                                                 | 64       | 0.4616018681     | 2.496165981  | 0.000133351135       | 0.001857379768 | 0.001207995112  |  |
| Rutin          | R-HSA-1169408 | ISG15 antiviral mechanism                                                          | 69       | 0.4239371602     | 2.331862094  | 0.000148855404       | 0.001857379768 | 0.001207995112  |  |
| Rutin          | R-HSA-2871837 | FCERI mediated NF-kB activation                                                    | 75       | 0.3861340167     | 2.15575237   | 0.0001607458608      | 0.001857379768 | 0.001207995112  |  |
| Rutin          | R-HSA-1169410 | Antiviral mechanism by IFN-stimulated genes                                        | 77       | 0.3997968025     | 2.246800743  | 0.0001639613051      | 0.001857379768 | 0.001207995112  |  |
| Rutin          | R-HSA-9662851 | Anti-inflammatory response favouring Leishmania parasite infection                 | 140      | -0.3800257431    | -1.641123355 | 0.0002054348943      | 0.00202541445  | 0.001317280827  |  |
| Rutin          | R-HSA-9020702 | Interleukin-1 signaling                                                            | 94       | 0.3362458296     | 1.964845044  | 0.0002143622722      | 0.002055528638 | 0.00133686637   |  |
| Rutin          | R-HSA-3238698 | WNT ligand biogenesis and trafficking                                              | 19       | -0.6461670939    | -1.989186587 | 0.000228443293       | 0.00212326946  | 0.001380310382  |  |
| Rutin          | R-HSA-9660821 | ADORA2B mediated anti-inflammatory cytokines production                            | 108      | -0.4002326642    | -1.683341581 | 0.000336555758       | 0.002799602456 | 0.001820794079  |  |
| Rutin          | R-HSA-168273  | Influenza Viral RNA Transcription and Replication                                  | 130      | 0.3406951661     | 2.111772556  | 0.0003617945007      | 0.00291415321  | 0.001895295133  |  |
| Rutin          | R-HSA-5668541 | TNFR2 non-canonical NF-kB pathway                                                  | 93       | 0.3187363572     | 1.857850168  | 0.0004231013328      | 0.003254625637 | 0.002116730207  |  |
| Rutin          | R-HSA-8950505 | Gene and protein expression by JAK-STAT signaling after Interleukin-12 stimulation | 35       | 0.4205242683     | 1.969330941  | 0.001322957198       | 0.00755975542  | 0.004916683036  |  |
| Rutin          | R-HSA-9679506 | SARS-CoV Infections                                                                | 131      | 0.2656706236     | 1.646723675  | 0.0014803849         | 0.008175514895 | 0.005317158184  |  |
| Rutin          | R-HSA-446652  | Interleukin-1 family signaling                                                     | 126      | 0.2530289061     | 1.561771852  | 0.001715265866       | 0.009096106866 | 0.005915889052  |  |
| Rutin          | R-HSA-9020591 | Interleukin-12 signaling                                                           | 44       | 0.3510323101     | 1.737816087  | 0.004107542942       | 0.01885429547  | 0.01226238014   |  |
| Rutin          | R-HSA-447115  | Interleukin-12 family signaling                                                    | 52       | 0.3043832231     | 1.570910759  | 0.009667608082       | 0.03812577835  | 0.02479608893   |  |
| Rutin          | R-HSA-9679191 | Potential therapeutics for SARS                                                    | 74       | 0.2713255038     | 1.512977379  | 0.009813232035       | 0.0384799498   | 0.02502643351   |  |
| Rutin          | R-HSA-209560  | NF-kB is activated and signals survival                                            | 13       | 0.5236055278     | 1.800037483  | 0.01221948613        | 0.04513794349  | 0.02935663242   |  |
| Sulindac       | R-HSA-5676590 | NIK ->noncanonical NF-kB signaling                                                 | 56       | 0.4996312573     | 2.170976078  | 4.02349722378692e-05 | 0.002711160687 | 0.002091466815  |  |
| Sulindac       | R-HSA-5607761 | Dectin-1 mediated noncanonical NF-kB signaling                                     | 57       | 0.5100412224     | 2.224029415  | 4.05153553196662e-05 | 0.002711160687 | 0.002091466815  |  |
| Sulindac       | R-HSA-9660821 | ADORA2B mediated anti-inflammatory cytokines production                            | 108      | -0.4372180691    | -1.871071118 | 9.9644128113879e-05  | 0.003278197179 | 0.002528894967  |  |
| Sulindac       | R-HSA-1169410 | Antiviral mechanism by IFN-stimulated genes                                        | 77       | 0.3908637601     | 1.811891075  | 0.000532622317       | 0.00957137339  | 0.0073836309    |  |
| Sulindac       | R-HSA-1169091 | Activation of NF-kappaB in B cells                                                 | 64       | 0.4058740207     | 1.812595358  | 0.001050552591       | 0.01598666986  | 0.01233257389   |  |
| Sulindac       | R-HSA-9662851 | Anti-inflammatory response favouring Leishmania parasite infection                 | 140      | -0.3640246568    | -1.614235234 | 0.00132845772        | 0.01872105132  | 0.01444195388   |  |
| Sulindac       | R-HSA-5668541 | TNFR2 non-canonical NF-kB pathway                                                  | 93       | 0.3412820726     | 1.643943657  | 0.00270426335        | 0.02981477849  | 0.02299997198   |  |
| Sulindac       | R-HSA-1169408 | ISG15 antiviral mechanism                                                          | 69       | 0.3760216788     | 1.706866142  | 0.002785276599       | 0.03022780806  | 0.02331859479   |  |
| Sulindac       | R-HSA-2871837 | FCERI mediated NF-kB activation                                                    | 75       | 0.3629367679     | 1.673597969  | 0.003009249015       | 0.0316192247   | 0.02439197334   |  |
| Sulindac       | R-HSA-9020702 | Interleukin-1 signaling                                                            | 94       | 0.3322636217     | 1.604201166  | 0.003850908054       | 0.0366753148   | 0.0282923857    |  |
| Sulfafurazole  | R-HSA-9660821 | ADORA2B mediated anti-inflammatory cytokines production                            | 108      | -0.4306193538    | -1.825004033 | 3.73055448474825e-05 | 0.001029873693 | 0.0006883892582 |  |
| Sulfafurazole  | R-HSA-9662851 | Anti-inflammatory response favouring Leishmania parasite infection                 | 140      | -0.4197075671    | -1.836736506 | 4.83512232859491e-05 | 0.001029873693 | 0.0006883892582 |  |
| Sulfafurazole  | R-HSA-168325  | Viral Messenger RNA Synthesis                                                      | 42       | 0.5102774546     | 2.278239823  | 5.47705115565779e-05 | 0.001029873693 | 0.0006883892582 |  |
| Sulfafurazole  | R-HSA-9678108 | SARS-CoV-1 Infection                                                               | 42       | 0.5180480874     | 2.312933429  | 5.47705115565779e-05 | 0.001029873693 | 0.0006883892582 |  |
| Sulfafurazole  | R-HSA-5676590 | NIK ->noncanonical NF-kB signaling                                                 | 56       | 0.4500133485     | 2.149550825  | 6.33673404727204e-05 | 0.001029873693 | 0.0006883892582 |  |
| Sulfafurazole  | R-HSA-5607761 | Dectin-1 mediated noncanonical NF-kB signaling                                     | 57       | 0.4717460974     | 2.262212277  | 6.42425799820121e-05 | 0.001029873693 | 0.0006883892582 |  |
| Sulfafurazole  | R-HSA-9694516 | SARS-CoV-2 Infection                                                               | 59       | 0.4534124748     | 2.19100229   | 6.5772165219679e-05  | 0.001029873693 | 0.0006883892582 |  |
| Sulfafurazole  | R-HSA-1169091 | Activation of NF-kappaB in B cells                                                 | 64       | 0.4113534726     | 2.023081707  | 6.97009827838573e-05 | 0.001029873693 | 0.0006883892582 |  |
| Sulfafurazole  | R-HSA-192823  | Viral mRNA Translation                                                             | 85       | 0.8647064394     | 4.497675929  | 8.48608282416836e-05 | 0.001031271086 | 0.0006893233047 |  |
| Sulfafurazole  | R-HSA-168273  | Influenza Viral RNA Transcription and Replication                                  | 130      | 0.7708064983     | 4.331049731  | 0.0001253604112      | 0.001262622846 | 0.0008439636921 |  |
| Sulfafurazole  | R-HSA-209560  | NF-kB is activated and signals survival                                            | 13       | 0.7380042107     | 2.346446175  | 0.0001856045139      | 0.001596757214 | 0.001067306138  |  |
| Sulfafurazole  | R-HSA-193639  | p75NTR signals via NF-kB                                                           | 16       | 0.6439705868     | 2.19322002   | 0.0001962092375      | 0.001654776702 | 0.001106087585  |  |
| Sulfafurazole  | R-HSA-2871837 | FCERI mediated NF-kB activation                                                    | 75       | 0.3562834389     | 1.809860239  | 0.0003883495146      | 0.002861522739 | 0.001912702041  |  |
| Sulfafurazole  | R-HSA-9679506 | SARS-CoV Infections                                                                | 131      | 0.2892214101     | 1.626126132  | 0.000508001016       | 0.003610159505 | 0.002413106616  |  |
| Sulfafurazole  | R-HSA-1169408 | ISG15 antiviral mechanism                                                          | 69       | 0.3388176757     | 1.693232294  | 0.001620745543       | 0.009299359673 | 0.006215887781  |  |
| Sulfafurazole  | R-HSA-8950505 | Gene and protein expression by JAK-STAT signaling after Interleukin-12 stimulation | 35       | 0.4355614264     | 1.85504697   | 0.001970692269       | 0.01112487571  | 0.00743610133   |  |
| Sulfafurazole  | R-HSA-1169410 | Antiviral mechanism by IFN-stimulated genes                                        | 77       | 0.3114963289     | 1.592532992  | 0.002505359811       | 0.01350744883  | 0.009028663166  |  |
| Sulfafurazole  | R-HSA-9020702 | Interleukin-1 signaling                                                            | 94       | 0.2902885679     | 1.537551592  | 0.003333642004       | 0.01660889255  | 0.01110173344   |  |
| Sulfafurazole  | R-HSA-168274  | Export of Viral Ribonucleoproteins from Nucleus                                    | 31       | 0.4310027981     | 1.779404701  | 0.004099546638       | 0.01985039548  | 0.01327443803   |  |
| Sulfafurazole  | R-HSA-68884   | Mitotic Telophase/Cytokinesis                                                      | 13       | 0.5923137743     | 1.883230976  | 0.006162069862       | 0.02810064432  | 0.01878306226   |  |
| Sulfafurazole  | R-HSA-447115  | Interleukin-12 family signaling                                                    | 52       | 0.3366313237     | 1.581831635  | 0.009280953488       | 0.03836187281  | 0.02564188341   |  |
| Dasatinib      | R-HSA-9660821 | ADORA2B mediated anti-inflammatory cytokines production                            | 108      | -0.4590362984    | -1.867333177 | 2.51863792061253e-05 | 0.005876821815 | 0.00543495513   |  |
| Dasatinib      | R-HSA-9662851 | Anti-inflammatory response favouring Leishmania parasite infection                 | 140      | -0.3852605708    | -1.616602947 | 0.0008056247254      | 0.04699477565  | 0.04346133387   |  |

Supplementary Table 7: GSEA results for top drugs targeting the 3CL protease (6M2Q)

| RNA-dependent RNA polymerase (NSP12) |               |                                                                                    |          |                    |                   |                       |                      |                      |
|--------------------------------------|---------------|------------------------------------------------------------------------------------|----------|--------------------|-------------------|-----------------------|----------------------|----------------------|
| Candidate drug                       | ID            | Description                                                                        | Set size | Enrichment score   | NES               | p-value               | p-adjust             | q-values             |
| Vemurafenib                          | R-HSA-1169410 | Antiviral mechanism by IFN-stimulated genes                                        | 77       | 0.406581833606254  | 1.94257871020949  | 7.17591762046572e-05  | 0.00522916830078176  | 0.00460705883347085  |
| Vemurafenib                          | R-HSA-1169408 | ISG15 antiviral mechanism                                                          | 69       | 0.40901832833856   | 1.90960217162075  | 0.00017012014793985   | 0.00850600523969923  | 0.00749551739919361  |
| Vemurafenib                          | R-HSA-168273  | Influenza Viral RNA Transcription and Replication                                  | 130      | 0.308179865093806  | 1.61361511760422  | 0.000810988890589437  | 0.0252307657650047   | 0.0222334266741244   |
| Sorafenib                            | R-HSA-9660821 | ADORA2B mediated anti-inflammatory cytokines production                            | 108      | -0.453523422493337 | -1.94021236408423 | 8.72120910843079e-06  | 0.000678831323992614 | 0.000539492262752025 |
| Sorafenib                            | R-HSA-192823  | Viral mRNA Translation                                                             | 85       | 0.629603412689939  | 2.95410295613698  | 2.57506308904568e-05  | 0.00074937574324246  | 0.00059556511734707  |
| Sorafenib                            | R-HSA-168273  | Influenza Viral RNA Transcription and Replication                                  | 130      | 0.543925333373416  | 2.74880523032984  | 3.03573054855651e-05  | 0.000758932637139128 | 0.00060315172741057  |
| Sorafenib                            | R-HSA-9662851 | Anti-inflammatory response favouring Leishmania parasite infection                 | 140      | -0.390591425899787 | -1.73464079134822 | 0.00013543830452522   | 0.00223069132510036  | 0.00177281257942186  |
| Levonorgestrel                       | R-HSA-9660821 | ADORA2B mediated anti-inflammatory cytokines production                            | 108      | -0.453087343563133 | -1.81709723888399 | 2.16993482962395e-05  | 0.00099503362047153  | 0.000712234406517962 |
| Levonorgestrel                       | R-HSA-5676590 | NIK ->noncanonical NF-kB signaling                                                 | 56       | 0.569886693839874  | 2.64911999403131  | 4.64921660700172e-05  | 0.00099503362047153  | 0.000712234406517962 |
| Levonorgestrel                       | R-HSA-5607761 | Dectin-1 mediated noncanonical NF-kB signaling                                     | 57       | 0.577349130224171  | 2.6933633064629   | 4.71120324130783e-05  | 0.00099503362047153  | 0.000712234406517962 |
| Levonorgestrel                       | R-HSA-1169091 | Activation of NF-kappaB in B cells                                                 | 64       | 0.494622347300901  | 2.36383615761675  | 5.11665984445354e-05  | 0.00099503362047153  | 0.000712234406517962 |
| Levonorgestrel                       | R-HSA-1169408 | ISG15 antiviral mechanism                                                          | 69       | 0.428852654813679  | 2.08203863728266  | 5.42474850824238e-05  | 0.00099503362047153  | 0.000712234406517962 |
| Levonorgestrel                       | R-HSA-2871837 | FCER1 mediated NF-kB activation                                                    | 75       | 0.433326167735557  | 2.1416776581742   | 5.86303839962477e-05  | 0.00099503362047153  | 0.000712234406517962 |
| Levonorgestrel                       | R-HSA-192823  | Viral mRNA Translation                                                             | 85       | 0.655605018572043  | 3.14185267520204  | 6.57548658600739e-05  | 0.00099503362047153  | 0.000712234406517962 |
| Levonorgestrel                       | R-HSA-5668541 | TNFR2 non-canonical NF-kB pathway                                                  | 93       | 0.386441281935432  | 1.98764878523195  | 7.1694866647548e-05   | 0.00099503362047153  | 0.000712234406517962 |
| Levonorgestrel                       | R-HSA-9020702 | Interleukin-1 signaling                                                            | 94       | 0.367207724197035  | 1.89240574447968  | 7.24952878062926e-05  | 0.00099503362047153  | 0.000712234406517962 |
| Levonorgestrel                       | R-HSA-168273  | Influenza Viral RNA Transcription and Replication                                  | 130      | 0.602685980889197  | 3.28182083703367  | 0.00010684902233146   | 0.00115068177895403  | 0.000823645904935517 |
| Levonorgestrel                       | R-HSA-1169410 | Antiviral mechanism by IFN-stimulated genes                                        | 77       | 0.392188744918012  | 1.94631068899511  | 0.000120307880540433  | 0.00122051582485947  | 0.000873632379899408 |
| Levonorgestrel                       | R-HSA-168325  | Viral Messenger RNA Synthesis                                                      | 42       | 0.460052395619905  | 2.0022540544456   | 0.000272458352794644  | 0.00235457835748458  | 0.00168538240325212  |
| Levonorgestrel                       | R-HSA-9662851 | Anti-inflammatory response favouring Leishmania parasite infection                 | 140      | -0.392665725203299 | -1.62074231763402 | 0.00038851411012609   | 0.00322766145388363  | 0.00231032609330618  |
| Levonorgestrel                       | R-HSA-3858494 | Beta-catenin independent WNT signaling                                             | 132      | 0.290978062858633  | 1.58775986774646  | 0.00087594437753027   | 0.00662876826240453  | 0.00474480254572114  |
| Levonorgestrel                       | R-HSA-5099000 | WNT5A-dependent internalization of FZD4                                            | 14       | 0.643351140854843  | 2.06864366184519  | 0.00198166955660144   | 0.0127263182534037   | 0.00910936464454161  |
| Levonorgestrel                       | R-HSA-446652  | Interleukin-1 family signaling                                                     | 126      | 0.278859803225048  | 1.50950052185997  | 0.00279127468210483   | 0.016699933995499    | 0.0119536369651993   |
| Levonorgestrel                       | R-HSA-9679506 | SARS-CoV Infections                                                                | 131      | 0.259226404719143  | 1.41329932175509  | 0.00800432666306111   | 0.0378583017847485   | 0.027085739090831    |
| Levonorgestrel                       | R-HSA-5140745 | WNT5A-dependent internalization of FZD2, FZD6 and ROR2                             | 12       | 0.609947800813526  | 1.86839878244653  | 0.00907018821815448   | 0.0419084604139151   | 0.0299976348225918   |
| Rakocifene                           | R-HSA-168274  | Export of Viral Ribonucleoproteins from Nucleus                                    | 31       | 0.605171403210317  | 2.49461268431468  | 3.30622231038815e-05  | 0.000698380107341023 | 0.000486765683838442 |
| Rakocifene                           | R-HSA-168325  | Viral Messenger RNA Synthesis                                                      | 42       | 0.602176676765964  | 2.68356349766003  | 3.88033060416748e-05  | 0.000698380107341023 | 0.000486765683838442 |
| Rakocifene                           | R-HSA-5676590 | NIK ->noncanonical NF-kB signaling                                                 | 56       | 0.606307873703184  | 2.88719165837004  | 4.69792351780513e-05  | 0.000698380107341023 | 0.000486765683838442 |
| Rakocifene                           | R-HSA-5607761 | Dectin-1 mediated noncanonical NF-kB signaling                                     | 57       | 0.603784485054598  | 2.88438114995461  | 4.762335831983998e-05 | 0.000698380107341023 | 0.000486765683838442 |
| Rakocifene                           | R-HSA-1169091 | Activation of NF-kappaB in B cells                                                 | 64       | 0.58986581818373   | 2.88643023502572  | 5.19966722129784e-05  | 0.000698380107341023 | 0.000486765683838442 |
| Rakocifene                           | R-HSA-2871837 | FCER1 mediated NF-kB activation                                                    | 75       | 0.549041872598982  | 2.77815047634368  | 5.92417061611374e-05  | 0.000698380107341023 | 0.000486765683838442 |
| Rakocifene                           | R-HSA-192823  | Viral mRNA Translation                                                             | 85       | 0.766484033530631  | 3.96950847020697  | 6.68851581833991e-05  | 0.000698380107341023 | 0.000486765683838442 |
| Rakocifene                           | R-HSA-5668541 | TNFR2 non-canonical NF-kB pathway                                                  | 93       | 0.391300936357624  | 2.06165657320156  | 7.27749072119933e-05  | 0.000698380107341023 | 0.000486765683838442 |
| Rakocifene                           | R-HSA-9020702 | Interleukin-1 signaling                                                            | 94       | 0.42015800127342   | 2.21704751137723  | 7.33299112708074e-05  | 0.000698380107341023 | 0.000486765683838442 |
| Rakocifene                           | R-HSA-9660821 | ADORA2B mediated anti-inflammatory cytokines production                            | 108      | -0.436976428791342 | -1.77770325909326 | 7.94631182772396e-05  | 0.000713130548641894 | 0.000497046630519576 |
| Rakocifene                           | R-HSA-168273  | Influenza Viral RNA Transcription and Replication                                  | 130      | 0.694969213984698  | 3.87184041152553  | 0.000109170305676856  | 0.00080441277867157  | 0.000560669658517703 |
| Rakocifene                           | R-HSA-1169408 | ISG15 antiviral mechanism                                                          | 69       | 0.414562046032442  | 2.06143901082339  | 0.000110920083088661  | 0.000812713627582107 | 0.00056645528779595  |
| Rakocifene                           | R-HSA-3858494 | Beta-catenin independent WNT signaling                                             | 132      | 0.367572106418147  | 2.05259728263026  | 0.000111457868925546  | 0.000812713627582107 | 0.00056645528779595  |
| Rakocifene                           | R-HSA-1169410 | Antiviral mechanism by IFN-stimulated genes                                        | 77       | 0.38107989677861   | 1.93746883861453  | 0.00018304996443346   | 0.00112010573798167  | 0.00078070327752567  |
| Rakocifene                           | R-HSA-446652  | Interleukin-1 family signaling                                                     | 126      | 0.304987424495168  | 1.69020073899593  | 0.00021177094287286   | 0.00127705183462179  | 0.000890065526837892 |
| Rakocifene                           | R-HSA-201681  | TCF dependent signaling in response to WNT                                         | 173      | 0.26881714593418   | 1.55663981191347  | 0.000518941350626362  | 0.00279429962875733  | 0.00194700583147222  |
| Rakocifene                           | R-HSA-9662851 | Anti-inflammatory response favouring Leishmania parasite infection                 | 140      | -0.385104328950152 | -1.61201104962118 | 0.000535803670255141  | 0.00286307304716488  | 0.0019955403870089   |
| Rakocifene                           | R-HSA-195721  | Signaling by WNT                                                                   | 255      | 0.227862984774869  | 1.38930277839498  | 0.00236220472440945   | 0.0104324498860818   | 0.00727133913175348  |
| Rakocifene                           | R-HSA-8950505 | Gene and protein expression by JAK-STAT signaling after Interleukin-12 stimulation | 35       | 0.406989802714876  | 1.73214027849819  | 0.00453443003269008   | 0.0184540757144364   | 0.0128623520205132   |
| Rakocifene                           | R-HSA-9020591 | Interleukin-12 signaling                                                           | 44       | 0.36292617362108   | 1.63571879013351  | 0.00644103056489038   | 0.0255451637134463   | 0.017804787039372    |
| Rakocifene                           | R-HSA-447115  | Interleukin-12 family signaling                                                    | 52       | 0.341316965276608  | 1.59974801443277  | 0.00700173928555501   | 0.0276904943496526   | 0.019300636250222    |
| Rakocifene                           | R-HSA-909733  | Interferon alpha/beta signaling                                                    | 69       | -0.396151219313152 | -1.51786623045219 | 0.0126542952618378    | 0.0458964076854222   | 0.0019894510709672   |

Supplementary Table 8: GSEA results for top drugs targeting the RNA-dependent RNA polymerase (NSP12)(6M71)

| Endoribonuclease (NSP15) |               |                                                                                    |          |                     |                   |                       |                      |                      |
|--------------------------|---------------|------------------------------------------------------------------------------------|----------|---------------------|-------------------|-----------------------|----------------------|----------------------|
| Candidate drug           | ID            | Description                                                                        | Set size | Enrichment score    | NES               | p-value               | p-adjust             | q-values             |
| Dexamethasone            | R-HSA-9660821 | ADORA2B mediated anti-inflammatory cytokines production                            | 108      | -0.471477511726897  | -1.87570091093215 | 1.13948426941966e-05  | 0.00142723885351942  | 0.000944338489546683 |
| Dexamethasone            | R-HSA-9662851 | Anti-inflammatory response favouring Leishmania parasite infection                 | 140      | -0.419911576651085  | -1.7075467323971  | 2.25418150669492e-05  | 0.00210390273958192  | 0.00139205594799406  |
| Dexamethasone            | R-HSA-168274  | Export of Viral Ribonucleoproteins from Nucleus                                    | 31       | 0.611649876017228   | 2.736900770473583 | 8.99361453368109e-05  | 0.0021467190466114   | 0.00142038553460003  |
| Dexamethasone            | R-HSA-168325  | Viral Messenger RNA Synthesis                                                      | 42       | 0.602186196773026   | 2.94025297194721  | 0.000115874855156431  | 0.0021467190466114   | 0.00142038553460003  |
| Dexamethasone            | R-HSA-5676590 | NIK ->noncanonical NF-kB signaling                                                 | 56       | 0.411270780003163   | 2.14635606918885  | 0.000160230732254446  | 0.0021467190466114   | 0.00142038553460003  |
| Dexamethasone            | R-HSA-5607761 | Dectin-1 mediated noncanonical NF-kB signaling                                     | 57       | 0.417782317608317   | 2.18791868132162  | 0.000163907556138338  | 0.0021467190466114   | 0.00142038553460003  |
| Dexamethasone            | R-HSA-192823  | Viral mRNA Translation                                                             | 85       | 0.502118369025727   | 2.8474762221436   | 0.000286994404591047  | 0.00255627511827975  | 0.00165630223389938  |
| Dexamethasone            | R-HSA-1169408 | ISG15 antiviral mechanism                                                          | 69       | 0.333776736342806   | 1.81832252157487  | 0.000413223140495868  | 0.00316890945113449  | 0.00209676174210402  |
| Dexamethasone            | R-HSA-2871837 | FCER1 mediated NF-kB activation                                                    | 75       | 0.330265587701427   | 1.82929876670774  | 0.000469263256687001  | 0.00335666580021482  | 0.00222091210841281  |
| Dexamethasone            | R-HSA-1169091 | Activation of NF-kappaB in B cells                                                 | 64       | 0.338206529337173   | 1.81546995103578  | 0.000564440263405456  | 0.00338600179013417  | 0.0025381064769757   |
| Dexamethasone            | R-HSA-168273  | Influenza Viral RNA Transcription and Replication                                  | 130      | 0.535653669485802   | 3.28006684949883  | 0.00066577896138482   | 0.00431523400897569  | 0.00285519243699143  |
| Dexamethasone            | R-HSA-909733  | Interferon alpha/beta signaling                                                    | 69       | -0.445011867083094  | -1.6813820109872  | 0.000927643784786642  | 0.005479757231519535 | 0.0036257007797888   |
| Dexamethasone            | R-HSA-1169410 | Antiviral mechanism by IFN-stimulated genes                                        | 77       | 0.285704187494755   | 1.59306267573016  | 0.00242365487154629   | 0.011989812085388    | 0.00793310874822666  |
| Dexamethasone            | R-HSA-4839735 | AXIN mutants destabilize the destruction complex, activating WNT signaling         | 13       | 0.566297733305241   | 1.9398739298277   | 0.00511576309601024   | 0.021653747184866    | 0.0143272913704377   |
| Dexamethasone            | R-HSA-1266695 | Interleukin-7 signaling                                                            | 23       | -0.529515770891534  | -1.64481373536237 | 0.008857066130321414  | 0.0346897369399436   | 0.022952697900113    |
| Dexamethasone            | R-HSA-8950505 | Gene and protein expression by JAK-STAT signaling after Interleukin-12 stimulation | 35       | 0.347109118720555   | 1.61792913011669  | 0.0109452736318408    | 0.0415019810923063   | 0.0274599574144583   |
| Dexamethasone            | R-HSA-5668541 | TNFR2 non-canonical NF-kB pathway                                                  | 93       | 0.242593602555991   | 1.40434249270299  | 0.011768661733937     | 0.0440538139814219   | 0.029148388138824    |
| Phenolphthalein          | R-HSA-168273  | Influenza Viral RNA Transcription and Replication                                  | 130      | -0.734808136077605  | -3.14957180402213 | 1.65005610190746e-05  | 0.000207862580266507 | 0.000134407382728719 |
| Phenolphthalein          | R-HSA-192823  | Viral mRNA Translation                                                             | 85       | -0.803869000521987  | -3.22507922269736 | 1.72562553925798e-05  | 0.000207862580266507 | 0.000134407382728719 |
| Phenolphthalein          | R-HSA-1169408 | ISG15 antiviral mechanism                                                          | 69       | -0.46603116955364   | -1.87816069268596 | 8.8008026320015e-05   | 0.000725353548916971 | 0.00046509891329771  |
| Phenolphthalein          | R-HSA-1169410 | Antiviral mechanism by IFN-stimulated genes                                        | 77       | -0.46729998470842   | -1.84159155653004 | 0.000139435081455014  | 0.01006512981396409  | 0.0006873053697832   |
| Phenolphthalein          | R-HSA-5676590 | NIK ->noncanonical NF-kB signaling                                                 | 56       | -0.507065603306953  | -1.88314619071709 | 0.000286902883373978  | 0.00197864057499295  | 0.00127942172518341  |
| Phenolphthalein          | R-HSA-449147  | Signaling by Interleukins                                                          | 409      | 0.268573809873669   | 1.43229999756256  | 0.000402860308188136  | 0.00267300678418668  | 0.00172841040180492  |
| Phenolphthalein          | R-HSA-168325  | Viral Messenger RNA Synthesis                                                      | 42       | -0.537305345776849  | -1.88341630019971 | 0.000495212941564873  | 0.00315135508268555  | 0.00203771832414254  |
| Phenolphthalein          | R-HSA-5607761 | Dectin-1 mediated noncanonical NF-kB signaling                                     | 57       | -0.49247317102619   | -1.83615309892325 | 0.0005572113063844242 | 0.00354406322735371  | 0.00229164990640917  |
| Phenolphthalein          | R-HSA-6785807 | Interleukin-4 and Interleukin-13 signaling                                         | 104      | 0.374559414869498   | 1.67244802551366  | 0.000937146550331233  | 0.005248026818549    | 0.00339345698252024  |
| Phenolphthalein          | R-HSA-168274  | Export of Viral Ribonucleoproteins from Nucleus                                    | 31       | -0.543112552905167  | -1.78078847785057 | 0.0027863487610332    | 0.0123837722715703   | 0.00800755199515078  |
| Phenolphthalein          | R-HSA-448424  | Interleukin-17 signaling                                                           | 65       | 0.3941251294936     | 1.61585792923176  | 0.00616102404593851   | 0.0255028725122923   | 0.011537346135708    |
| Phenolphthalein          | R-HSA-5668541 | TNFR2 non-canonical NF-kB pathway                                                  | 93       | -0.381513325406234  | -1.55270841737834 | 0.00065628582673123   | 0.0250505380575907   | 0.0161980922778406   |
| Phenolphthalein          | R-HSA-4791275 | Signaling by WNT in cancer                                                         | 31       | 0.474742317052852   | 1.65104462343028  | 0.012456538998549     | 0.0421235618308421   | 0.0227377918605445   |
| Spirolactone             | R-HSA-168325  | Viral Messenger RNA Synthesis                                                      | 42       | -0.60768603666276   | -2.46723663517616 | 4.13479429398387e-05  | 0.000573166787441097 | 0.000403802466039329 |
| Spirolactone             | R-HSA-5676590 | NIK ->noncanonical NF-kB signaling                                                 | 56       | -0.471164851310287  | -2.04221383918887 | 4.51834447858305e-05  | 0.000573166787441097 | 0.000403802466039329 |
| Spirolactone             | R-HSA-1169410 | Antiviral mechanism by IFN-stimulated genes                                        | 77       | -0.439993317070705  | -2.03263496921474 | 5.05178075271533e-05  | 0.000573166787441097 | 0.000403802466039329 |
| Spirolactone             | R-HSA-192823  | Viral mRNA Translation                                                             | 85       | -0.406893918605999  | -1.91840721723034 | 5.2534804307854e-05   | 0.000573166787441097 | 0.000403802466039329 |
| Spirolactone             | R-HSA-168273  | Influenza Viral RNA Transcription and Replication                                  | 130      | -0.487261048942222  | -2.47827948941961 | 6.50195056851755e-05  | 0.000619233389064338 | 0.000436256966431011 |
| Spirolactone             | R-HSA-5607761 | Dectin-1 mediated noncanonical NF-kB signaling                                     | 57       | -0.466260593834548  | -2.02791577478152 | 9.07935355002724e-05  | 0.000710117037432298 | 0.000500285401709822 |
| Spirolactone             | R-HSA-1169408 | ISG15 antiviral mechanism                                                          | 69       | -0.426235533276121  | -1.92525857314502 | 9.72478848585043e-05  | 0.00074806652757726  | 0.000527017166642997 |
| Spirolactone             | R-HSA-168274  | Export of Viral Ribonucleoproteins from Nucleus                                    | 31       | -0.568183028077224  | -2.13976468379911 | 0.000116004794864854  | 0.0006308272290127   | 0.000608051194838984 |
| Spirolactone             | R-HSA-913531  | Interferon Signaling                                                               | 182      | -0.308693966861092  | -1.65026397284668 | 0.000162866449511401  | 0.0011400651465798   | 0.000803188753643065 |
| Spirolactone             | R-HSA-1169091 | Activation of NF-kappaB in B cells                                                 | 64       | -0.375793573615333  | -1.67411189942594 | 0.00362762649580703   | 0.0183345743470391   | 0.0129169144084028   |
| Spirolactone             | R-HSA-9660821 | ADORA2B mediated anti-inflammatory cytokines production                            | 108      | 0.374013015756146   | 1.56841557232671  | 0.00372266170311773   | 0.0187472172099454   | 0.0132076259501871   |
| Spirolactone             | R-HSA-2871837 | FCER1 mediated NF-kB activation                                                    | 75       | -0.347361789593439  | -1.59839901888183 | 0.00483501146446017   | 0.023023864116477    | 0.0162205719376985   |
| Spirolactone             | R-HSA-909733  | Interferon alpha/beta signaling                                                    | 69       | -0.35101936654178   | -1.58551561186282 | 0.000202936886122727  | 0.0275853477311051   | 0.0194341885895079   |
| Spirolactone             | R-HSA-68884   | Mitotic Telophase/Cytokinesis                                                      | 13       | -0.611341403855248  | -1.80849902401457 | 0.00068998701341947   | 0.0406167120322972   | 0.0286149317099718   |
| Mifepristone             | R-HSA-1169408 | ISG15 antiviral mechanism                                                          | 69       | 0.358074615543641   | 1.77434154584096  | 0.000536078052964512  | 0.0296833211175888   | 0.01847750266824778  |
| Mifepristone             | R-HSA-1169410 | Antiviral mechanism by IFN-stimulated genes                                        | 77       | 0.327670020734597   | 1.66051471525399  | 0.00132402503610977   | 0.0378292867459935   | 0.033790370416722    |
| Carbamazepine            | R-HSA-9662851 | Anti-inflammatory response favouring Leishmania parasite infection                 | 140      | -0.4224555906963905 | -1.80348774668326 | 1.13247718058481e-05  | 0.00135624088775654  | 0.00106153892041696  |
| Carbamazepine            | R-HSA-9660821 | ADORA2B mediated anti-inflammatory cytokines production                            | 108      | -0.46934122580356   | -1.95508155679512 | 1.14714418455256e-05  | 0.00135624088775654  | 0.00106153892041696  |
| Carbamazepine            | R-HSA-168274  | Export of Viral Ribonucleoproteins from Nucleus                                    | 31       | 0.586167427094314   | 2.69302482424876  | 8.34167500834168e-05  | 0.00341997264021888  | 0.00267683572817132  |
| Carbamazepine            | R-HSA-168325  | Viral Messenger RNA Synthesis                                                      | 42       | 0.624453496035066   | 3.1159581830055   | 0.000103874519580347  | 0.00341997264021888  | 0.00267683572817132  |
| Carbamazepine            | R-HSA-1169408 | ISG15 antiviral mechanism                                                          | 69       | 0.46959361379513    | 2.63036504705283  | 0.000175654312313367  | 0.00352552479954873  | 0.00275945211754153  |
| Carbamazepine            | R-HSA-1169410 | Antiviral mechanism by IFN-stimulated genes                                        | 77       | 0.48962094845069    | 0.48962094845069  | 0.000204122990467442  | 0.00376016587703183  | 0.00294310727668431  |
| Carbamazepine            | R-HSA-192823  | Viral mRNA Translation                                                             | 85       | 0.569593747617224   | 3.32843929163762  | 0.000240442414041837  | 0.0039579552072555   | 0.00309791832387442  |
| Carbamazepine            | R-HSA-168273  | Influenza Viral RNA Transcription and Replication                                  | 130      | 0.56812009422238    | 3.58424407708979  | 0.000510204081632653  | 0.0062491198681173   | 0.0048558675057971   |
| Carbamazepine            | R-HSA-913531  | Interferon Signaling                                                               | 182      | 0.211050398272419   | 1.4100753845135   | 0.0058411214953271    | 0.0393152408339324   | 0.030772305043702    |

Supplementary Table 9: GSEA results for top drugs targeting the SP15 Endoribonuclease (6W01)

| Drug name       | Protein target     | Tested against SARS-CoV-2 / COVID patients | Suggested as candidate by Repurposing strategies | Used against other SARS/MERS | Already in Clinical Trials |
|-----------------|--------------------|--------------------------------------------|--------------------------------------------------|------------------------------|----------------------------|
| Cholic Acid     | 3CLP <sub>ro</sub> | Yes [1]                                    | Yes [2]                                          | No                           | No                         |
| Rutin           | 3CLP <sub>ro</sub> | No                                         | Yes [3, 4, 5, 6, 7, 8, 9, 10, 11]                | No                           | No                         |
| Indomethacin    | 3CLP <sub>ro</sub> | Yes [12]                                   | Yes [13, 14]                                     | Yes [15]                     | 2 clinical trials          |
| Sulindac        | 3CLP <sub>ro</sub> | No                                         | No                                               | No                           | No                         |
| Sulfisoxazole   | 3CLP <sub>ro</sub> | No                                         | No                                               | No                           | No                         |
| Dasatinib       | 3CLP <sub>ro</sub> | No                                         | Yes [16]                                         | No                           | No                         |
| Dexamethasone   | NSP15              | Yes [17, 18]                               | Yes [19]                                         | No                           | 40 clinical trials         |
| Phenolphthalein | NSP15              | No                                         | No                                               | No                           | No                         |
| Spirolactone    | NSP15              | Yes [20]                                   | Yes [21, 22, 23]                                 | No                           | 4 clinical trials          |
| Mifepristone    | NSP15              | Yes [24]                                   | No                                               | No                           | No                         |
| Carbamazepine   | NSP15              | No                                         | No                                               | No                           | No                         |
| Vemurafenib     | NSP12              | No                                         | Yes [25, 26]                                     | No                           | No                         |
| Sorafenib       | NSP12              | No                                         | Yes [27]                                         | No                           | No                         |
| Levonorgestrel  | NSP12              | No                                         | No                                               | No                           | No                         |
| Naloxone        | NSP12              | No                                         | No                                               | No                           | No                         |
| Raloxifene      | NSP12              | No                                         | No                                               | No                           | No                         |

Supplementary Table 10: Previous research analyzing the effects of our candidate drugs in SARS-CoV-2 infection.

## 2. References

- [1] S. Abdulrab, S. Al-Maweri, E. Halboub, Ursodeoxycholic acid as a candidate therapeutic to alleviate and/or prevent COVID-19-associated cytokine storm, *Med Hypotheses* 143 (2020) 109897.
- [2] A. Carino, F. Moraca, B. Fiorillo, S. Marchian?, V. Sepe, M. Biagioli, C. Finamore, S. Bozza, D. Francisci, E. Distrutti, B. Catalanotti, A. Zampella, S. Fiorucci, Hijacking SARS-CoV-2/ACE2 Receptor Interaction by Natural and Semi-synthetic Steroidal Agents Acting on Functional Pockets on the Receptor Binding Domain, *Front Chem* 8 (2020) 572885.
- [3] M. T. Rehman, M. F. AlAjmi, A. Hussain, Natural Compounds as Inhibitors of SARS-CoV-2 Main Protease (3CLpro): A Molecular Docking and Simulation Approach to Combat COVID-19, *Curr Pharm Des.*
- [4] M. Ye, G. Luo, D. Ye, M. She, N. Sun, Y. J. Lu, J. Zheng, Network pharmacology, molecular docking integrated surface plasmon resonance technology reveals the mechanism of Toujie Quwen Granules against coronavirus disease 2019 pneumonia, *Phytomedicine* (2020) 153401.
- [5] M. Bello, A. Mart?nez-Mu?oz, I. Balbuena-Rebolledo, Identification of saquinavir as a potent inhibitor of dimeric SARS-CoV2 main protease through MM/GBSA, *J Mol Model* 26 (12) (2020) 340.
- [6] T. Huynh, H. Wang, B. Luan, Structure-based lead optimization of herbal medicine rutin for inhibiting SARS-CoV-2's main protease, *Phys Chem Chem Phys* 22 (43) (2020) 25335–25343.
- [7] H. A. Hassan, U. R. Abdelmohsen, O. M. Aly, S. Y. Desoukey, K. M. Mohamed, M. S. Kamel, Potential of Ficus microcarpa metabolites against SARS-CoV-2 main protease supported by docking studies, *Nat Prod Res* (2020) 1–5.
- [8] F. M. A. da Silva, K. P. A. da Silva, L. P. M. de Oliveira, E. V. Costa, H. H. Koolen, M. L. B. Pinheiro, A. Q. L. de Souza, A. D. L. de Souza, Flavonoid glycosides and their putative human metabolites as potential inhibitors of the SARS-CoV-2 main protease (Mpro) and RNA-dependent RNA polymerase (RdRp), *Mem Inst Oswaldo Cruz* 115 (2020) e200207.
- [9] S. C, D. K. S, V. Ragunathan, P. Tiwari, S. A, B. D. P, Molecular docking, validation, dynamics simulations, and pharmacokinetic prediction of natural compounds against the SARS-CoV-2 main-protease, *J Biomol Struct Dyn* (2020) 1–27.
- [10] D. Bhowmik, R. Nandi, R. Jagadeesan, N. Kumar, A. Prakash, D. Kumar, Identification of potential inhibitors against SARS-CoV-2 by targeting proteins responsible for envelope formation and virion



- assembly using docking based virtual screening, and pharmacokinetics approaches, *Infect Genet Evol* 84 (2020) 104451.
- [11] P. Das, R. Majumder, M. Mandal, P. Basak, In-Silico approach for identification of effective and stable inhibitors for COVID-19 main protease (Mpro) from flavonoid based phytochemical constituents of *Calendula officinalis*, *J Biomol Struct Dyn* (2020) 1–16.
  - [12] R. Gomeni, T. Xu, X. Gao, F. Bressolle-Gomeni, Model based approach for estimating the dosage regimen of indomethacin a potential antiviral treatment of patients infected with SARS CoV-2, *J Pharmacokinet Pharmacodyn* 47 (3) (2020) 189–198.
  - [13] X. Zeng, X. Song, T. Ma, X. Pan, Y. Zhou, Y. Hou, Z. Zhang, K. Li, G. Karypis, F. Cheng, Repurpose Open Data to Discover Therapeutics for COVID-19 Using Deep Learning, *J Proteome Res* 19 (11) (2020) 4624–4636.
  - [14] M. A. Marinella, Indomethacin and resveratrol as potential treatment adjuncts for SARS-CoV-2/COVID-19, *Int J Clin Pract* 74 (9) (2020) e13535.
  - [15] C. Amici, A. Di Caro, A. Ciucci, L. Chiappa, C. Castilletti, V. Martella, N. Decaro, C. Buonavoglia, M. R. Capobianchi, M. G. Santoro, Indomethacin has a potent antiviral activity against SARS coronavirus, *Antivir Ther* 11 (8) (2006) 1021–1030.
  - [16] Z. Qiao, H. Zhang, H. F. Ji, Q. Chen, Computational View toward the Inhibition of SARS-CoV-2 Spike Glycoprotein and the 3CL Protease, *Computation (Basel)* 8 (2).
  - [17] R. Hajjo, D. A. Sabbah, S. K. Bardaweel, Chemocentric Informatics Analysis: Dexamethasone Versus Combination Therapy for COVID-19, *ACS Omega* 5 (46) (2020) 29765–29779.
  - [18] A. Alvarez, L. Cabia, C. Trigo, A. C. Bandr?s, M. Bestu?, Prescription profile in patients with SARS-CoV-2 infection hospitalised in Aragon, Spain, *Eur J Hosp Pharm*.
  - [19] I. Sarkar, A. Sen, In silico screening predicts common cold drug Dextromethorphan along with Prednisolone and Dexamethasone can be effective against novel Coronavirus disease (COVID-19), *J Biomol Struct Dyn* (2020) 1–5.
  - [20] V. Y. Mareev, Y. A. Orlova, E. P. Pavlikova, S. T. Matskeplishvili, Z. A. Akopyan, A. G. Plisyk, E. M. Seredenina, D. A. Asratyan, A. V. Potapenko, P. S. Malakhov, L. M. Samokhodskaya, E. A. Mershina, V. E. Sinitsyn, M. M. Bulanova, A. A. Fuks, Y. V. Mareev, Y. L. Begrambekova, A. A. Kamalov, [Combination therapy at an early stage of the novel coronavirus infection (COVID-19). Case series

- and design of the clinical trial "Bromhexine and Spironolactone for Coronavirus Infection requiring hospitalization (BISCUIT)", *Kardiologija* 60 (8) (2020) 4–15.
- [21] G. A. Pathak, F. R. Wendt, A. Goswami, F. De Angelis, R. Polimanti, ACE2 Netlas: In-silico functional characterization and drug-gene interactions of ACE2 gene network to understand its potential involvement in COVID-19 susceptibility, *medRxiv*.
  - [22] F. A. Cadegiani, Repurposing existing drugs for COVID-19: an endocrinology perspective, *BMC Endocrinol Disord* 20 (1) (2020) 149.
  - [23] F. A. Cadegiani, A. Goren, C. G. Wambier, Spironolactone may provide protection from SARS-CoV-2: Targeting androgens, angiotensin converting enzyme 2 (ACE2), and renin-angiotensin-aldosterone system (RAAS), *Med Hypotheses* 143 (2020) 110112.
  - [24] S. Matsuyama, M. Kawase, N. Nao, K. Shirato, M. Ujike, W. Kamitani, M. Shimojima, S. Fukushima, The inhaled steroid ciclesonide blocks SARS-CoV-2 RNA replication by targeting the viral replication-transcription complex in cultured cells, *J Virol*.
  - [25] A. Ianevski, R. Yao, S. Biza, E. Zusinaite, A. Mannik, G. Kivi, A. Planken, K. Kurg, E. M. Tombak, M. Ustav, N. Shtaida, E. Kuleskiy, E. Jo, J. Yang, H. Lysvand, K. L?seth, V. Oksenysh, P. A. Aas, T. Tenson, A. Vitkauskien?, M. P. Windisch, M. H. Fenstad, S. A. Nordb?, M. Ustav, M. Bj?r?s, D. E. Kainov, Identification and Tracking of Antiviral Drug Combinations, *Viruses* 12 (10).
  - [26] S. Sinha, K. Cheng, A. A. Sch?ffer, K. Aldape, E. Schiff, E. Rupp, In vitro and in vivo identification of clinically approved drugs that modify ACE2 expression, *Mol Syst Biol* 16 (7) (2020) e9628.
  - [27] Y. H. Taguchi, T. Turki, A new advanced in silico drug discovery method for novel coronavirus (SARS-CoV-2) with tensor decomposition-based unsupervised feature extraction, *PLoS One* 15 (9) (2020) e0238907.
